# Supplementary material for: Diversity in sea buckthorn (Hippophae rhamnoides L.) accessions with different origins based on morphological characteristics, oil traits, and microsatellite markers
Source: PubMed Central journal article supplement (PMC7069629; doi:10.1371/journal.pone.0230356), 2020-03-13

# PLOS ONE

## Diversity in sea buckthorn (*Hippophae rhamnoides* L.) varieties with different origins based on morphological characteristics, oil traits, and microsatellite markers

--Manuscript Draft--

|                                |                                                                                                                                                                                                                                                                                                                                                                                                                                                                                                                                                                                                                                                                                                                                                                                                                                                                                                                                                                                                                                                                                                                                                                                                                                                                                                                                                                                                                                                                                                                                                                                                                                                                                                                                                                                                                                                                                                                                                                                                                                                                                                                                                                                                                                                                                                          |
|--------------------------------|----------------------------------------------------------------------------------------------------------------------------------------------------------------------------------------------------------------------------------------------------------------------------------------------------------------------------------------------------------------------------------------------------------------------------------------------------------------------------------------------------------------------------------------------------------------------------------------------------------------------------------------------------------------------------------------------------------------------------------------------------------------------------------------------------------------------------------------------------------------------------------------------------------------------------------------------------------------------------------------------------------------------------------------------------------------------------------------------------------------------------------------------------------------------------------------------------------------------------------------------------------------------------------------------------------------------------------------------------------------------------------------------------------------------------------------------------------------------------------------------------------------------------------------------------------------------------------------------------------------------------------------------------------------------------------------------------------------------------------------------------------------------------------------------------------------------------------------------------------------------------------------------------------------------------------------------------------------------------------------------------------------------------------------------------------------------------------------------------------------------------------------------------------------------------------------------------------------------------------------------------------------------------------------------------------|
| <b>Manuscript Number:</b>      | PONE-D-19-17567                                                                                                                                                                                                                                                                                                                                                                                                                                                                                                                                                                                                                                                                                                                                                                                                                                                                                                                                                                                                                                                                                                                                                                                                                                                                                                                                                                                                                                                                                                                                                                                                                                                                                                                                                                                                                                                                                                                                                                                                                                                                                                                                                                                                                                                                                          |
| <b>Article Type:</b>           | Research Article                                                                                                                                                                                                                                                                                                                                                                                                                                                                                                                                                                                                                                                                                                                                                                                                                                                                                                                                                                                                                                                                                                                                                                                                                                                                                                                                                                                                                                                                                                                                                                                                                                                                                                                                                                                                                                                                                                                                                                                                                                                                                                                                                                                                                                                                                         |
| <b>Full Title:</b>             | Diversity in sea buckthorn ( <i>Hippophae rhamnoides</i> L.) varieties with different origins based on morphological characteristics, oil traits, and microsatellite markers                                                                                                                                                                                                                                                                                                                                                                                                                                                                                                                                                                                                                                                                                                                                                                                                                                                                                                                                                                                                                                                                                                                                                                                                                                                                                                                                                                                                                                                                                                                                                                                                                                                                                                                                                                                                                                                                                                                                                                                                                                                                                                                             |
| <b>Short Title:</b>            | Diversity in sea buckthorn varieties based on morphological characteristics, oil traits, and SSR markers                                                                                                                                                                                                                                                                                                                                                                                                                                                                                                                                                                                                                                                                                                                                                                                                                                                                                                                                                                                                                                                                                                                                                                                                                                                                                                                                                                                                                                                                                                                                                                                                                                                                                                                                                                                                                                                                                                                                                                                                                                                                                                                                                                                                 |
| <b>Corresponding Author:</b>   | Chengjiang Ruan<br>Dalian Medical University<br>Dalian, CHINA                                                                                                                                                                                                                                                                                                                                                                                                                                                                                                                                                                                                                                                                                                                                                                                                                                                                                                                                                                                                                                                                                                                                                                                                                                                                                                                                                                                                                                                                                                                                                                                                                                                                                                                                                                                                                                                                                                                                                                                                                                                                                                                                                                                                                                            |
| <b>Keywords:</b>               | diversity analysis; morphological characteristics; SSR markers; biochemical traits; fatty acid composition                                                                                                                                                                                                                                                                                                                                                                                                                                                                                                                                                                                                                                                                                                                                                                                                                                                                                                                                                                                                                                                                                                                                                                                                                                                                                                                                                                                                                                                                                                                                                                                                                                                                                                                                                                                                                                                                                                                                                                                                                                                                                                                                                                                               |
| <b>Abstract:</b>               | <p>Sea buckthorn (<i>Hippophae rhamnoides</i>) is an ecologically and economically important species. Here, we assessed the diversity of 78 varieties cultivated in northern China using 8 agronomic characteristics, oil traits (including oil content and fatty acid composition) in seeds and pulp/peel, and SSR markers at 20 loci. The 78 varieties included 52 from ssp. <i>mongolica</i>, 6 from ssp. <i>sinensis</i>, and 20 hybrids. To assess the phenotypic diversity of these varieties, 8 agronomic fruit traits were recorded and analyzed using principal component analysis (PCA). The first two PCs accounted for approximately 78% of the variation among varieties. The oil contents were higher in pulp/peel (3.46-38.56%) than in seeds (3.88-8.82%), especially in ssp. <i>mongolica</i> varieties. The polyunsaturated fatty acids (PUFA) ratio was slightly lower in seed oil of hybrids (76.06%) than in ssp. <i>mongolica</i> (77.66%) and higher than in ssp. <i>sinensis</i> (72.22%). The monounsaturated fatty acids (MUFA) ratio of pulp/peel oil of ssp. <i>sinensis</i> (57.00%) was highest, and that of ssp. <i>mongolica</i> (51.00%) was approximately equal to the ratio in the hybrids (51.20%). Using canonical correspondence analysis (CCA), we examined the correlation between agronomic traits and oil characteristics in pulp/peel and seeds, respectively. Oil traits in pulp/peel from different origins were correlated with morphological groupings (<math>r = 0.8725</math>, <math>p = 0.0000</math>). To assess the genotypic diversity, 20 SSR markers were used among the 78 varieties with 59 polymorphic amplified fragments obtained and an average PIC value of 0.2725. All varieties were classified into two groups based on the UPGMA method. The varieties of ssp. <i>sinensis</i> and ssp. <i>mongolica</i> were genetically distant. Seven hybrid varieties were close to ssp. <i>sinensis</i> varieties whereas the others were close to ssp. <i>mongolica</i> varieties. The 8 agronomic traits, oil characters in seed and pulp/peel oils, and 20 SSR markers successfully distinguished the 78 varieties. These results will be valuable for cultivar identification and genetic diversity analysis in cultivated sea buckthorn.</p> |
| <b>Order of Authors:</b>       | <p>He Li</p> <p>Chengjiang Ruan</p> <p>Jian Ding</p> <p>Jingbin Li</p> <p>Li Wang</p> <p>Xingjun Tian</p>                                                                                                                                                                                                                                                                                                                                                                                                                                                                                                                                                                                                                                                                                                                                                                                                                                                                                                                                                                                                                                                                                                                                                                                                                                                                                                                                                                                                                                                                                                                                                                                                                                                                                                                                                                                                                                                                                                                                                                                                                                                                                                                                                                                                |
| <b>Additional Information:</b> |                                                                                                                                                                                                                                                                                                                                                                                                                                                                                                                                                                                                                                                                                                                                                                                                                                                                                                                                                                                                                                                                                                                                                                                                                                                                                                                                                                                                                                                                                                                                                                                                                                                                                                                                                                                                                                                                                                                                                                                                                                                                                                                                                                                                                                                                                                          |
| <b>Question</b>                | <b>Response</b>                                                                                                                                                                                                                                                                                                                                                                                                                                                                                                                                                                                                                                                                                                                                                                                                                                                                                                                                                                                                                                                                                                                                                                                                                                                                                                                                                                                                                                                                                                                                                                                                                                                                                                                                                                                                                                                                                                                                                                                                                                                                                                                                                                                                                                                                                          |
| <b>Financial Disclosure</b>    | This research was financially supported by the Natural Science Foundation of China (NSFC)(Grant No. 31100489), which was received by He Li.                                                                                                                                                                                                                                                                                                                                                                                                                                                                                                                                                                                                                                                                                                                                                                                                                                                                                                                                                                                                                                                                                                                                                                                                                                                                                                                                                                                                                                                                                                                                                                                                                                                                                                                                                                                                                                                                                                                                                                                                                                                                                                                                                              |

Enter a financial disclosure statement that describes the sources of funding for the work included in this submission. Review the [submission guidelines](#) for detailed requirements. View published research articles from [PLOS ONE](#) for specific examples.

This statement is required for submission and **will appear in the published article** if the submission is accepted. Please make sure it is accurate.

#### Unfunded studies

Enter: *The author(s) received no specific funding for this work.*

#### Funded studies

Enter a statement with the following details:

- Initials of the authors who received each award
- Grant numbers awarded to each author
- The full name of each funder
- URL of each funder website
- Did the sponsors or funders play any role in the study design, data collection and analysis, decision to publish, or preparation of the manuscript?
- **NO** - Include this sentence at the end of your statement: *The funders had no role in study design, data collection and analysis, decision to publish, or preparation of the manuscript.*
- **YES** - Specify the role(s) played.

\* typeset

#### Competing Interests

Use the instructions below to enter a competing interest statement for this submission. On behalf of all authors, disclose any [competing interests](#) that could be perceived to bias this work—acknowledging all financial support and any other relevant financial or non-financial competing interests.

This statement **will appear in the published article** if the submission is accepted. Please make sure it is accurate. View published research articles from [PLOS ONE](#) for specific examples.

<https://isisn.nsf.gov.cn/egrantweb/>

The authors have declared that no competing interests exist.

**NO authors have competing interests**

Enter: *The authors have declared that no competing interests exist.*

**Authors with competing interests**

Enter competing interest details beginning with this statement:

*I have read the journal's policy and the authors of this manuscript have the following competing interests: [insert competing interests here]*

\* typeset

**Ethics Statement**

Enter an ethics statement for this submission. This statement is required if the study involved:

- Human participants
- Human specimens or tissue
- Vertebrate animals or cephalopods
- Vertebrate embryos or tissues
- Field research

Write "N/A" if the submission does not require an ethics statement.

General guidance is provided below. Consult the [submission guidelines](#) for detailed instructions. **Make sure that all information entered here is included in the Methods section of the manuscript.**

N/A

**Format for specific study types**

**Human Subject Research (involving human participants and/or tissue)**

- Give the name of the institutional review board or ethics committee that approved the study
- Include the approval number and/or a statement indicating approval of this research
- Indicate the form of consent obtained (written/oral) or the reason that consent was not obtained (e.g. the data were analyzed anonymously)

**Animal Research (involving vertebrate animals, embryos or tissues)**

- Provide the name of the Institutional Animal Care and Use Committee (IACUC) or other relevant ethics board that reviewed the study protocol, and indicate whether they approved this research or granted a formal waiver of ethical approval
- Include an approval number if one was obtained
- If the study involved *non-human primates*, add *additional details* about animal welfare and steps taken to ameliorate suffering
- If anesthesia, euthanasia, or any kind of animal sacrifice is part of the study, include briefly which substances and/or methods were applied

**Field Research**

Include the following details if this study involves the collection of plant, animal, or other materials from a natural setting:

- Field permit number
- Name of the institution or relevant body that granted permission

**Data Availability**

Authors are required to make all data underlying the findings described fully available, without restriction, and from the time of publication. PLOS allows rare exceptions to address legal and ethical concerns. See the [PLOS Data Policy](#) and [FAQ](#) for detailed information.

Yes - all data are fully available without restriction

A Data Availability Statement describing where the data can be found is required at submission. Your answers to this question constitute the Data Availability Statement and **will be published in the article**, if accepted.

**Important:** Stating 'data available on request from the author' is not sufficient. If your data are only available upon request, select 'No' for the first question and explain your exceptional situation in the text box.

Do the authors confirm that all data underlying the findings described in their manuscript are fully available without restriction?

**Describe where the data may be found in full sentences. If you are copying our sample text, replace any instances of XXX with the appropriate details.**

- If the data are **held or will be held in a public repository**, include URLs, accession numbers or DOIs. If this information will only be available after acceptance, indicate this by ticking the box below. For example: *All XXX files are available from the XXX database (accession number(s) XXX, XXX).*
- If the data are all contained **within the manuscript and/or Supporting Information files**, enter the following: *All relevant data are within the manuscript and its Supporting Information files.*
- If neither of these applies but you are able to provide **details of access elsewhere**, with or without limitations, please do so. For example:

*Data cannot be shared publicly because of [XXX]. Data are available from the XXX Institutional Data Access / Ethics Committee (contact via XXX) for researchers who meet the criteria for access to confidential data.*

*The data underlying the results presented in the study are available from (include the name of the third party*

All relevant data are within the manuscript and its Supporting Information files.

*and contact information or URL).*

- This text is appropriate if the data are owned by a third party and authors do not have permission to share the data.

\* typeset

Additional data availability information:

1 Diversity in sea buckthorn (*Hippophae rhamnoides*  
2 L.) varieties with different origins based on  
3 morphological characteristics, oil traits, and  
4 microsatellite markers

5

6

7 He Li<sup>1,2</sup>, Chengjiang Ruan<sup>2\*</sup>, Jian Ding<sup>2</sup>, Jingbin Li<sup>2</sup>, Li Wang<sup>2</sup>, Xingjun Tian<sup>1,3\*</sup>

8 <sup>1</sup> School of Life Science, Nanjing University, Nanjing, P.R. China

9 <sup>2</sup> Key Laboratory of Biotechnology and Bioresources Utilization, Dalian Minzu  
10 University, Dalian, P.R. China

11 <sup>3</sup> Co-Innovation Center for Sustainable Forestry in Southern China, Nanjing Forestry  
12 University, Nanjing, P.R. China

13

14

15 \* Corresponding authors

16 E-mail: ruan@dlnu.edu.cn (CR); tianxj@nju.edu.cn (XT)

17

18

19

20

21

22

## 23 **Abstract**

24 Sea buckthorn (*Hippophae rhamnoides*) is an ecologically and economically important  
25 species. Here, we assessed the diversity of 78 varieties cultivated in northern China  
26 using 8 agronomic characteristics, oil traits (including oil content and fatty acid  
27 composition) in seeds and pulp/peel, and SSR markers at 20 loci. The 78 varieties  
28 included 52 from ssp. *mongolica*, 6 from ssp. *sinensis*, and 20 hybrids. To assess the  
29 phenotypic diversity of these varieties, 8 agronomic fruit traits were recorded and  
30 analyzed using principal component analysis (PCA). The first two PCs accounted for  
31 approximately 78% of the variation among varieties. The oil contents were higher in  
32 pulp/peel (3.46-38.56%) than in seeds (3.88-8.82%), especially in ssp. *mongolica*  
33 varieties. The polyunsaturated fatty acids (PUFA) ratio was slightly lower in seed oil of  
34 hybrids (76.06%) than in ssp. *mongolica* (77.66%) and higher than in ssp. *sinensis*  
35 (72.22%). The monounsaturated fatty acids (MUFA) ratio of pulp/peel oil of ssp.  
36 *sinensis* (57.00%) was highest, and that of ssp. *mongolica* (51.00%) was approximately  
37 equal to the ratio in the hybrids (51.20%). Using canonical correspondence analysis  
38 (CCA), we examined the correlation between agronomic traits and oil characteristics in  
39 pulp/peel and seeds, respectively. Oil traits in pulp/peel from different origins were  
40 correlated with morphological groupings ( $r = 0.8725$ ,  $p = 0.0000$ ). To assess the  
41 genotypic diversity, 20 SSR markers were used among the 78 varieties with 59  
42 polymorphic amplified fragments obtained and an average PIC value of 0.2725. All  
43 varieties were classified into two groups based on the UPGMA method. The varieties  
44 of ssp. *sinensis* and ssp. *mongolica* were genetically distant. Seven hybrid varieties were



45 close to ssp. *sinensis* varieties whereas the others were close to ssp. *mongolica* varieties.  
46 The 8 agronomic traits, oil characters in seed and pulp/peel oils, and 20 SSR markers  
47 successfully distinguished the 78 varieties. These results will be valuable for cultivar  
48 identification and genetic diversity analysis in cultivated sea buckthorn.

49

## 50 **Introduction**

51 Sea buckthorn (*Hippophae rhamnoides* L.) is a winter hardy shrub that is naturally  
52 distributed throughout Asia and Europe. It is an economically valuable species, divided  
53 into eight subspecies. Of them, the ssp. *sinensis* and *mongolica* mainly distributed in  
54 Asia where they are abundant and commercially cultivated [1–2]. The fruits of sea  
55 buckthorn are rich in a variety of phytochemicals with physiological properties, such  
56 as lipids, carotenoids, ascorbic acid, tocopherols, and flavonoids [3–7]. The main  
57 applications for the fruits include food, cosmetics, and pharmaceutical products [8–10].  
58 One of the most requested products for therapeutic practices is sea buckthorn oil, which  
59 is extracted from both seeds and pulp. The applications of sea buckthorn oils include  
60 healing of the skin, mucosa, and immune systems, especially in cancer and  
61 cardiovascular disease therapy [11–13].

62 Two important parameters in analyzing sea buckthorn oil quality are oil content and  
63 fatty acid composition (referred to here as ‘oil traits’ for simplicity). Sea buckthorn seed  
64 and pulp/peel oils are considered the most valuable products of the berries with a unique  
65 fatty acid (FA) composition [14]. The seed oil contains omega-3 ( $\alpha$ -linolenic acid) and  
66 omega-6 (linoleic acid) FAs, and the pulp/peel oil is characterized by a high

67 concentration of FAs from the omega-7 group (e.g., palmitoleic acid). The seed oil is  
68 rich in unsaturated fatty acids (commonly 30-40% linoleic acid and 20-35% linolenic  
69 acid) [14]. The soft parts (pulp and peel) of the berries have a FA composition that  
70 differs from the seeds that is characterized by a high level of palmitoleic acid (16–54%),  
71 which is very uncommon in plants. The oil traits of sea buckthorn berries varies greatly  
72 according to their origin, based on the climatic and geological conditions of the growing  
73 areas [15].

74 Sea buckthorn is resistant to cold, drought, salt and alkali. The vigorous vegetative  
75 reproduction and the strong, complex root system with nitrogen-fixing nodules make it  
76 an optimal pioneer plant for soil and water conservation. For these reasons, sea  
77 buckthorn was cultivated widely in arid and semiarid areas of China [16]. Due to small  
78 berries and thorns of native cultivars (ssp. *sinensis*), which have little economic value,  
79 the breeding of sea buckthorn has undergone different stages of development in China,  
80 such as introduction, domestication, seedling selection and artificial hybridization for  
81 elite varieties. The cultivars of ssp. *mongolica* (introduced from Russia and Mongolia),  
82 ssp. *sinensis* (China origin) and hybrids (ssp. *mongolica* × ssp. *sinensis*) are abundant  
83 in northern China [17]. However, as a perennial woody plant, traditional cross breeding  
84 that takes a long time and has low efficiency cannot meet the needs of modern  
85 production in sea buckthorn. It is essential for economic production to utilize MAB  
86 (molecular marker-assisted breeding) in sea buckthorn, especially to breed those  
87 varieties associated with desirable oil traits. An essential step in this process is the  
88 genetic analysis of sea buckthorn germplasm. At present, molecular markers are mainly

89 used for the analysis of genetic diversity, the taxonomic and geographic origin of  
90 cultivars, sex determination and population genetic structure in sea buckthorn [17–19].  
91 SSR (simple sequence repeat, microsatellite) markers, with 1- to 6-bp DNA regions  
92 repeated in tandem, have been used in these analysis for their advantages of  
93 codominance, random distribution throughout the genome, easy detection, and high  
94 polymorphism and reproducibility [20]. Currently, an increasing number of  
95 microsatellite markers are being developed in sea buckthorn using high-throughput  
96 sequencing techniques for transcriptome datasets (RNA-Seq), which have become  
97 valuable resources for SSR discovery [17, 21].

98 The aim of this study is to report the phenotypic characteristics and oil traits in  
99 pulp/peel and seeds, and genetic diversity of the 78 sea buckthorn varieties in northern  
100 China, providing the identification foundation for MAB in sea buckthorn.

101

## 102 **Materials and methods**

### 103 **Plant materials**

104 Berries and leaves of 78 sea buckthorn varieties were collected from the end of July to  
105 mid-September in 2015. Table 1 summarizes information on the plant materials. Three  
106 research institutes located in northern China, the Institute of Selection and Breeding of  
107 *Hippophae* (42°26'N, 121°28'E; 380 m) in Fuxin, the Research Institute of Berry  
108 (47°14'N, 127°06'E; 202 m) in Suiling and the Jiuchenggong Breeding Base of Sea  
109 Buckthorn (39°40'N, 110°09'E; 1400 m) in Dongsheng, provided 76 varieties (Fig 1).  
110 The other two elite varieties, Quysisike and Zhongguoshaji<sup>wild</sup>, were harvested from

111 cultivated fields in Qinghe (46°40'N, 90°22'E; 1218 m) and Datong (36°53'N, 101°35'E;  
 112 2800 m) (Fig 1).

113

114 **Fig 1. Five cultivated lands of the 78 sea buckthorn varieties used in this study.**

115

116 **Table 1. Sample  sea buckthorn grouped according to different genetic backgrounds.**

| No. | Accession name   | Abbrev. <sup>a</sup> | Origin  | ssp. <sup>b</sup> | No. | Accession name | Abbrev. <sup>a</sup> | Origin  | ssp. <sup>b</sup> |
|-----|------------------|----------------------|---------|-------------------|-----|----------------|----------------------|---------|-------------------|
| 1   | Zhuangyuanhuang  | ZYH                  | Fuxin   | M                 | 40  | E13-10         | E13-10               | Suiling | M                 |
| 2   | Wucifeng         | WCF                  | Fuxin   | M                 | 41  | E13-11         | E13-11               | Suiling | M                 |
| 3   | Liusha-1         | LS1                  | Fuxin   | M                 | 42  | E13-14         | E13-14               | Suiling | M                 |
| 4   | Siberia rumianes | SR                   | Fuxin   | M                 | 43  | HS-1           | HS1                  | Suiling | M                 |
| 5   | Fangxiang        | FX                   | Fuxin   | M                 | 44  | HS-4           | HS4                  | Suiling | M                 |
| 6   | Yalishanda-12    | YLSD12               | Fuxin   | M                 | 45  | HS-9           | HS9                  | Suiling | M                 |
| 7   | Jiuyuehuang      | JYH                  | Fuxin   | M                 | 46  | HS-10          | HS10                 | Suiling | M                 |
| 8   | Nanren           | NR                   | Fuxin   | M                 | 47  | HS-12          | HS12                 | Suiling | M                 |
| 9   | Botanical garden | BG                   | Fuxin   | M                 | 48  | HS-14          | HS14                 | Suiling | M                 |
| 10  | Zajiao-1         | ZJ1                  | Fuxin   | H                 | 49  | HS-18          | HS18                 | Suiling | M                 |
| 11  | Zajiao-2         | ZJ2                  | Fuxin   | H                 | 50  | HS-20          | HS20                 | Suiling | M                 |
| 12  | Zajiao-3         | ZJ3                  | Fuxin   | H                 | 51  | HS-22          | HS22                 | Suiling | M                 |
| 13  | MZ-14            | MZ14                 | Suiling | M                 | 52  | Xin'e-1        | XE1                  | Suiling | M                 |
| 14  | Shoudu           | SD                   | Suiling | M                 | 53  | Xin'e-2        | XE2                  | Suiling | M                 |
| 15  | Fenlan           | FL                   | Suiling | M                 | 54  | Xin'e-3        | XE3                  | Suiling | M                 |

|    |           |        |         |   |    |                 |         |           |   |
|----|-----------|--------|---------|---|----|-----------------|---------|-----------|---|
| 16 | Aertai    | AET    | Suiling | M | 55 | Zhongguoshaji   | ZGSJ    | Suiling   | S |
| 17 | Chengse   | CS     | Suiling | M | 56 | EZ-4            | EZ4     | Suiling   | H |
| 18 | Chuyi     | CY     | Suiling | M | 57 | Za-56           | Za56    | Suiling   | H |
| 19 | Hunjin    | HJ     | Suiling | M | 58 | Za1-2           | Za1-2   | Suiling   | H |
| 20 | Jinse     | JS     | Suiling | M | 59 | Za05-6          | Za05-6  | Suiling   | H |
| 21 | Juren     | JR     | Suiling | M | 60 | Za05-20         | Za05-20 | Suiling   | H |
| 22 | Xiangyang | XY     | Suiling | M | 61 | Za05-21         | Za05-21 | Suiling   | H |
| 23 | Yousheng  | YS     | Suiling | M | 62 | Za4             | Za4     | Suiling   | H |
| 24 | Katuni    | KTN    | Suiling | M | 63 | Za13-19         | Za13-19 | Suiling   | H |
| 25 | Wulangemu | WLGEM  | Suiling | M | 64 | Za13-25         | Za13-25 | Suiling   | H |
| 26 | TF1       | TF1    | Suiling | M | 65 | Juda            | JD      | Dongsheng | S |
| 27 | TF2-13    | TF2-13 | Suiling | M | 66 | Jianpingdahuang | JPDH    | Dongsheng | S |
| 28 | TF2-23    | TF2-23 | Suiling | M | 67 | Manhanci        | MHC     | Dongsheng | S |
| 29 | TF2-24    | TF2-24 | Suiling | M | 68 | Zhongxiongyou   | ZXY     | Dongsheng | S |
| 30 | TF2-36    | TF2-36 | Suiling | M | 69 | Liaofuza        | LFZ     | Dongsheng | H |
| 31 | Suiji-1   | SJ-1   | Suiling | M | 70 | Zacyou-1        | ZCY1    | Dongsheng | H |
| 32 | Suiji-3   | SJ-3   | Suiling | M | 71 | Zacyou-10       | ZCY10   | Dongsheng | H |
| 33 | Suiji-4   | SJ-4   | Suiling | M | 72 | Zacyou-12       | ZCY12   | Dongsheng | H |
| 34 | HD-3      | HD3    | Suiling | M | 73 | Xinzaci-26      | XZC26   | Dongsheng | H |
| 35 | E10-06    | E10-06 | Suiling | M | 74 | Shiciyou-2      | SCY2    | Dongsheng | H |
| 36 | E10-34    | E10-34 | Suiling | M | 75 | Shiciyou-5      | SCY5    | Dongsheng | H |
| 37 | E10-42    | E10-42 | Suiling | M | 76 | Shiciyou-30     | SCY30   | Dongsheng | H |

|    |        |        |         |   |    |                               |                      |        |   |
|----|--------|--------|---------|---|----|-------------------------------|----------------------|--------|---|
| 38 | E10-47 | E10-47 | Suiling | M | 77 | Zhongguoshaji <sup>wild</sup> | ZGSJ <sup>wild</sup> | Datong | S |
| 39 | E13-00 | E13-00 | Suiling | M | 78 | Qiuyisike                     | QYSK                 | Qinghe | M |

117

118 <sup>a</sup> Abbrev., abbreviation.

119 <sup>b</sup> ssp., subspecies; M, ssp. *mongolica*; S, ssp. *sinensis*; H, hybrid (ssp. *mongolica* × ssp. *sinensis*).

120

## 121 **Morphological characteristics of fruit**

122 Hundred berry weight (HBW) was the weight of 100 fresh berries after they were  
 123 picked from bushes. Hundred seed weight (HSW) was the weight of 100 seeds after air  
 124 drying at room temperature (25 °C) for 2 weeks [22]. There were **three replicates** for  
 125 each measurement. The transverse and longitudinal diameters of berries (BTD and BLD)  
 126 and the length, width and thickness of seeds (SL, SW and ST) were measured by  
 127 micrometer calipers with over 20 measurements for each, on average. The berry shape  
 128 indices (BSI) were estimated by the ratio of BLD to BTD.

129

## 130 **Oil extraction and FA analysis in seeds and pulp/peel**

131 The methods of lipid extraction, transesterification (methylation) and purification of  
 132 methyl esters of the lipid extracts were described by Yang and Kallio [15]. Briefly, the  
 133 seeds and pulp isolated from freeze-dried berries and lipids from the samples were  
 134 extracted with chloroform/methanol (2:1, v/v) with mechanical homogenization of the  
 135 tissues. The purified oils were filtered before the solvent was removed on a rotary  
 136 evaporator. The lipids were weighed, and the oil contents (percentages) in seeds and  
 137 pulp/peel were calculated. **Each sample was analyzed three times.** Lipids were stored

138 in chloroform at  $-20\text{ }^{\circ}\text{C}$  until analysis.

139 The oil (10 mg) was transesterified by sodium methoxide catalysis [15, 23]. It was  
140 dissolved in sodium-dried diethyl ether (1ml) and methyl acetate (20  $\mu\text{l}$ ). Then 1 M  
141 sodium methoxide in dry methanol (20  $\mu\text{l}$ ) was added, and the solution was agitated  
142 briefly and set still for 5 min at room temperature. The reaction is stopped by adding a  
143 saturated solution of oxalic acid in diethyl ether (30  $\mu\text{l}$ ) with brief agitation. The mixture  
144 is centrifuged at 1500 g for 2 min and the supernatant was dried in a gentle stream of  
145 nitrogen. Fresh hexane (1 ml) was added and the solution was filtered with microporous  
146 filtering films (0.22  $\mu\text{m}$ ) for analysis.

147 FAMES were analyzed with a gas chromatography-tandem mass spectrometry  
148 (GC/MS/MS) system (model AxION<sup>®</sup> iQT<sup>™</sup>, PekinElmer, Shelton, CT, USA).  
149 Chromatographic separation was achieved using a DB-23 capillary column (60 m  $\times$   
150 0.25 mm  $\times$  0.25 $\mu\text{m}$ ; Agilent Technologies, Santa Clara, CA, USA) with the following  
151 temperature program: initial temperature 50  $^{\circ}\text{C}$ , hold for 1 min, heated to 175  $^{\circ}\text{C}$  at  
152 25  $^{\circ}\text{C}/\text{min}$ , then heated to 215  $^{\circ}\text{C}$  at 3  $^{\circ}\text{C}/\text{min}$  and hold for 10 min, heated to 230  $^{\circ}\text{C}$  at  
153 3  $^{\circ}\text{C}/\text{min}$  and hold for 5 min. The inlet was operated in split mode (1:20) at a  
154 temperature of 250  $^{\circ}\text{C}$  with helium as the carrier gas at constant flow of 1.0 mL/min.  
155 The transfer line temperature was 215  $^{\circ}\text{C}$ , and the MS ion source was set to 230  $^{\circ}\text{C}$ .  
156 MS detection was carried out in electron impact (EI) ionization mode, scanning all  
157 masses from 45–400 amu. FAME components were identified based on mass spectral  
158 comparison with an external standard (Supelco 37 Component FAME Mix, Sigma-  
159 Aldrich, St. Louis, MO, USA) and previous studies [14–15]. The main fatty acid

160 composition was expressed as a weight percentage of the total fatty acids from three  
161 replicates.

162

### 163 **Statistical analysis**

164 The data analysis for morphological traits and oil characteristics were performed with  
165 SPSS<sup>®</sup> 24.0 (IBM<sup>®</sup>). The following parameters were evaluated: mean, minimum value,  
166 maximum value, standard deviation (SD) and coefficient of variation (CV%). One-way  
167 ANOVA was used in the comparison of all traits among subsp. of *sinensis*, subsp. of  
168 *mongolica* and hybrids. Pearson correlation coefficients were calculated to analyze the  
169 relationship between pairs of 8 agronomic traits. Principal component analysis (PCA)  
170 was used to determine relationships among the varieties. In addition, a canonical  
171 correspondence analysis (CCA) was applied to the data between morphological  
172 characteristics and oil traits in different tissues (seeds and pulp/peel).

173

### 174 **DNA extraction and SSR analysis**

175 Total genomic DNA was extracted from young leaves using the TaKaRa MiniBEST  
176 Plant Genomic DNA Extraction Kit (TaKaRa, Beijing, China) based on the  
177 manufacturer's protocol. Purity and quantity of extracted DNA were evaluated by gel  
178 electrophoresis and NanoDrop 2000 Spectrophotometer (Thermo Fisher Scientific,  
179 Waltham, MA, USA). Twenty polymorphic microsatellite loci (SSR) were evaluated,  
180 including previously published loci SB1-SB17 [17] and our newly developed loci  
181 SB18-SB20 using RNA-Seq (S2 Table). PCR amplification was performed in 20 µL



182 volumes containing 40 ng of DNA template, 1× PCR buffer, 1.5 mM MgCL<sub>2</sub>, 0.15 mM  
183 of each dNTP (Takara, Dalian, China), 1.5 U of Taq polymerase (Takara, Dalian, China)  
184 and 0.5 μM of each primer. The PCR conditions included an initial denaturation at 94 °C  
185 for 2 min, 35 cycles of 30 s at 94 °C for denaturation, 30 s at 54–60 °C for annealing  
186 and 45 s at 72 °C for extension, with a final extension 7 min at 72 °C using a C1000  
187 Touch™ Thermal Cycler (Bio-Rad, Berkeley, CA, USA). PCR products were  
188 electrophoresed on 8% nondenaturing polyacrylamide gels using a SE 600 Ruby  
189 Standard Dual Cooled Vertical Unit (GE Healthcare Life Sciences, Pittsburgh, PA, USA)  
190 and visualized by silver staining.

191 The microsatellites were scored as codominant markers for genetic diversity  
192 analysis. The number of alleles (Na), effective number of alleles (Ne), observed and  
193 expected heterozygosity (Ho and He), Shannon's information index (Is) and  
194 polymorphic information content (PIC) for each of the genic SSR markers were  
195 calculated using GenAlEx 6.5 [24–25] and PowerMarker version 3.25 [26] software  
196 packages. A genetic similarity matrix based on the proportion of shared alleles was  
197 generated, and a UPGMA tree was constructed using PowerMarker. The dendrogram  
198 was displayed using MEGA 6 software [27] to reveal genetic relationships between the  
199 78 sea buckthorn varieties.

200

## 201 **Results**

### 202 **Morphological characterization of berries and seeds**

203 Descriptive statistics analysis of 8 agronomic fruit traits for the 78 sea buckthorn

204 varieties from different origins is shown in [Table 2](#) and [Table 3](#). Minimum, maximum,  
205 mean, standard deviation (SD), and coefficient of variation (CV%) were recorded.  
206 Relatively high CV values were observed in HBW, BLD, and HSW (> 20%). The  
207 highest coefficient of variation was observed in HBW (39.12%), which varied from  
208 8.52 to 69.74 g. Analysis of variance (ANOVA,  $p < 0.05$ ) showed that HBW of ssp.  
209 *mongolica* berries was  $47.69 \pm 11.03$  g, which was much higher than ssp. *sinensis*  
210 berries ( $10.73 \pm 1.54$  g) and hybrids ( $31.44 \pm 13.84$  g). In hybrids, the HBW values  
211 were high in EZ4, Za56, Za1-2, Za05-6 and Za05-21(> 45 g), which were  
212 approximately the size of ssp. *mongolica* berries on average ([S1 Table](#)). BTD varied  
213 from 5.54 to 10.80 mm and BLD varied from 4.83 to 14.25 mm. In addition, BLD of  
214 berries from ssp. *mongolica* was higher than BTD, which was the opposite in berries of  
215 ssp. *sinensis*. According to BSI values, the berry shapes of the three groups were  
216 significantly different ( $p = 0.000$ ): oblong berries of ssp. *mongolica* ( $1.35 \pm 0.20$ ),  
217 oblate for those of ssp. *sinensis* ( $0.90 \pm 0.05$ ) and circular for those of hybrids ( $1.08 \pm$   
218  $0.11$ ). HSW varied from 0.61 to 2.19 g with an average of 1.45 g. Similar to HBW, there  
219 were significant differences for HSW among seeds from ssp. *mongolica*, ssp. *sinensis*,  
220 and hybrids ( $p = 0.000$ ). SL varied from 2.00 to 3.49 mm and SW varied from 2.98 to  
221 7.43 mm. ST varied from 1.54 to 2.73 mm with an average of 1.93 mm. Overall, the  
222 agronomic characters of seeds (HSW, SL, SW, and ST) showed relatively low  
223 coefficients of variation, ranging between 11.50–24.33%; however, the berries (HFW,  
224 FTD, FLD, and FSI) had high coefficients of variation.

225

226 **Table 2. Descriptive statistics for morphological traits of berries and seeds among the sea**  
 227 **buckthorn varieties studied.**

| Trait name                       | Abbrev. <sup>a</sup> | Min  | Max   | Mean  | SD    | CV(%) |
|----------------------------------|----------------------|------|-------|-------|-------|-------|
| Hundred berry weight (g)         | HBW                  | 8.52 | 69.74 | 40.68 | 15.92 | 39.12 |
| Berry transverse diameter (mm)   | BTD                  | 5.54 | 10.80 | 7.85  | 1.20  | 15.25 |
| Berry longitudinal diameter (mm) | BLD                  | 4.83 | 14.25 | 9.76  | 2.23  | 22.87 |
| Berry shape index                | BSI                  | 0.85 | 1.89  | 1.24  | 0.23  | 18.55 |
| Hundred seed weight (g)          | HSW                  | 0.61 | 2.19  | 1.45  | 0.35  | 24.33 |
| Seed length (mm)                 | SL                   | 2.98 | 7.43  | 5.38  | 1.03  | 19.06 |
| Seed width (mm)                  | SW                   | 2.00 | 3.49  | 2.65  | 0.30  | 11.37 |
| Seed thickness (mm)              | ST                   | 1.54 | 2.73  | 1.93  | 0.22  | 11.50 |

228 <sup>a</sup> Abbrev., Abbreviation

229

230 **Table 3. Fruit traits of sea buckthorn berries of different origins<sup>a</sup>.**

| Character | <i>ssp. mongolica</i> |       | <i>ssp. sinensis</i> |      | Hybrid |       |
|-----------|-----------------------|-------|----------------------|------|--------|-------|
|           | mean                  | SD    | mean                 | SD   | mean   | SD    |
| HBW (g)   | 47.69a                | 11.03 | 10.73c               | 1.54 | 31.44b | 13.84 |
| BTD (mm)  | 8.17a                 | 0.99  | 5.84b                | 0.23 | 7.61a  | 1.24  |

|          |        |      |       |      |       |      |
|----------|--------|------|-------|------|-------|------|
| BLD (mm) | 10.90a | 1.48 | 5.20c | 0.19 | 8.15b | 1.18 |
| BSI (%)  | 1.35   | 0.20 | 0.90  | 0.05 | 1.08  | 0.11 |
| HSW (g)  | 1.60a  | 0.28 | 0.79c | 0.23 | 1.28b | 0.25 |
| SL (mm)  | 5.91a  | 0.68 | 3.31c | 0.27 | 4.64b | 0.56 |
| SW (mm)  | 2.76a  | 0.27 | 2.18c | 0.18 | 2.52b | 0.22 |
| ST (mm)  | 1.98a  | 0.18 | 1.67b | 0.16 | 1.86a | 0.26 |

231 <sup>a</sup> Values with different lower case letters (a–c) are significantly different at  $p < 0.05$ .

232

233 PCA was performed using fruit characteristics (Fig 2). The first two principal  
234 components explained 78.11% of the total morphological variance. The first principle  
235 component (PC) accounted for 41.74% of the variance. It was associated with BTD,  
236 HBW, ST, HSW, and SW in descending order. Therefore, these traits were important  
237 attributes for the classification of sea buckthorn varieties. The second PC accounted for  
238 36.37%, which is correlated with BSI, SL, and BLD in descending order. The plot  
239 shows the distribution of 78 sea buckthorn varieties on PC1 and PC2 (Fig 2). The ssp.  
240 *mongolica* varieties with bigger berries tended to cluster together, mainly positive on  
241 PC2. Six varieties of ssp. *sinensis* with the smallest berries were negative on both PC1  
242 and PC2. The hybrids were largely distributed between the above two groups. Some  
243 hybrids (including ZCY1, ZCY10, ZCY12, XZC26, SCY2, and SCY5) were close to  
244 the varieties from ssp. *sinensis*.

245

246 Fig 2. Two-dimensional scatter plot for the first two principal components (PC1 and PC2) based  
 247 on the agronomic fruit characteristics of 78 sea buckthorn varieties. Numbers associated with  
 248 symbols are the variety codes as listed in Table 1. ▲ = *ssp. mongolica*; ● = *ssp. sinensis*; ◇ = hybrid.

249

## 250 Oil characterization in seeds and seedless parts

251 The oil characteristics of seeds and seedless parts (pulp and peel) among the 78 varieties  
 252 of different origins are summarized in Tables 4 and Table 5. One special feature of sea  
 253 buckthorn fruit was the high oil content in the pulp and peel (20.41%), in contrast to oil  
 254 in seeds (8.82%). A higher coefficient of variation was observed in pulp/peel oil content  
 255 (42.72%) and varied over a wide range, from 3.46 to 38.56%. The pulp/peel fraction of  
 256 berries of *ssp. mongolica* had the highest oil content (24.68%) based on dry weight. The  
 257 lowest pulp/peel oil content (7.10%) on average was found in the berries of *ssp. sinensis*.  
 258 In hybrids, the berries of ZJ2 contained 27.22% pulp/peel oil, which slightly exceeded  
 259 that of *ssp. mongolica* on average (S1 Table). Seed oil content varied from 3.88 to 12.75%  
 260 with an average of 8.82%. The seeds of *ssp. mongolica* had the highest oil contents with  
 261 an average of 9.46%, and those of the other two groups did not differ significantly.

262

263 Table 4. Oil characteristics of pulp/peel and seeds of 78 sea buckthorn varieties.

| Character   | Pulp/peel |       |       |      |       | Seed |       |      |      |       |
|-------------|-----------|-------|-------|------|-------|------|-------|------|------|-------|
|             | Min       | Max   | Mean  | SD   | CV(%) | Min  | Max   | Mean | SD   | CV(%) |
| oil content | 3.46      | 38.56 | 20.41 | 8.72 | 42.72 | 3.88 | 12.75 | 8.82 | 1.86 | 21.08 |

|        |       |       |       |      |        |                 |                 |                 |      |       |
|--------|-------|-------|-------|------|--------|-----------------|-----------------|-----------------|------|-------|
| 16:0   | 24.52 | 53.08 | 36.26 | 4.83 | 13.32  | 3.84            | 11.77           | 6.55            | 1.39 | 21.16 |
| 16:1n7 | 17.93 | 57.75 | 35.12 | 7.64 | 21.76  | tr <sup>a</sup> | tr <sup>a</sup> | tr <sup>a</sup> |      |       |
| 18:0   | 0.38  | 5.12  | 1.26  | 0.70 | 55.58  | 1.41            | 4.58            | 2.16            | 0.43 | 20.11 |
| 18:1n9 | 1.44  | 23.43 | 8.72  | 4.72 | 54.13  | 3.05            | 25.95           | 13.25           | 4.04 | 30.50 |
| 18:1n7 | 3.51  | 24.24 | 7.68  | 4.09 | 53.28  | 0.45            | 2.38            | 1.20            | 0.47 | 39.17 |
| 18:2n6 | 3.02  | 17.40 | 9.97  | 3.18 | 31.91  | 34.22           | 52.75           | 42.17           | 3.60 | 8.54  |
| 18:3n3 | 0.12  | 7.16  | 1.00  | 1.03 | 102.83 | 21.37           | 47.16           | 34.67           | 4.42 | 12.75 |

264 <sup>a</sup> tr, trace (< 0.5%).

265 **Table 5. Oil content and fatty acid composition in seeds and the soft parts of sea buckthorn berries of different origins<sup>a</sup>.**

| Character   | Pulp/peel oil         |      |                      |      |        |      | Seed oil              |      |                      |      |                 |      |
|-------------|-----------------------|------|----------------------|------|--------|------|-----------------------|------|----------------------|------|-----------------|------|
|             | <i>ssp. mongolica</i> |      | <i>ssp. sinensis</i> |      | Hybrid |      | <i>ssp. mongolica</i> |      | <i>ssp. sinensis</i> |      | Hybrid          |      |
|             | mean                  | SD   | mean                 | SD   | mean   | SD   | mean                  | SD   | mean                 | SD   | mean            | SD   |
| oil content | 24.68a                | 6.79 | 7.10c                | 3.28 | 13.34b | 4.85 | 9.46a                 | 1.56 | 6.70b                | 1.32 | 7.78b           | 1.84 |
| 16:0        | 37.68a                | 4.64 | 29.39b               | 3.71 | 34.62a | 3.14 | 6.52                  | 1.16 | 7.41                 | 1.55 | 6.38            | 1.82 |
| 16:1n7      | 37.43a                | 7.09 | 23.65b               | 4.16 | 32.55a | 5.84 | tr <sup>b</sup>       |      | tr <sup>b</sup>      |      | tr <sup>b</sup> |      |
| 18:0        | 1.08b                 | 0.69 | 1.73a                | 0.64 | 1.59ab | 0.57 | 2.13                  | 0.29 | 2.19                 | 0.44 | 2.23            | 0.69 |
| 18:1n9      | 7.56b                 | 3.97 | 16.67a               | 6.84 | 9.33b  | 3.40 | 12.62b                | 3.75 | 16.37a               | 3.77 | 13.96ab         | 4.46 |
| 18:1n7      | 6.01c                 | 1.79 | 16.68a               | 6.20 | 9.32b  | 3.63 | 1.07b                 | 0.37 | 1.80a                | 0.39 | 1.37b           | 0.55 |
| 18:2n6      | 9.55ab                | 2.76 | 8.34b                | 5.54 | 11.53a | 2.92 | 42.10                 | 3.08 | 40.44                | 4.06 | 42.87           | 4.62 |
| 18:3n3      | 0.69b                 | 0.41 | 3.54a                | 2.09 | 1.07b  | 0.64 | 35.56a                | 4.13 | 31.78b               | 2.91 | 33.20ab         | 4.89 |

|      |        |      |        |      |        |      |        |      |        |      |         |      |
|------|--------|------|--------|------|--------|------|--------|------|--------|------|---------|------|
| MUFA | 51.00b | 5.38 | 57.00a | 9.46 | 51.20b | 3.52 | 13.69b | 3.93 | 18.18a | 4.09 | 15.33ab | 4.90 |
| PUFA | 10.24  | 2.98 | 11.89  | 7.54 | 12.60  | 3.37 | 77.66a | 4.31 | 72.22b | 5.54 | 76.06ab | 6.23 |

266 <sup>a</sup> Values with different lowercase letters (a–c) are significantly different at  $p < 0.05$ .

267 <sup>b</sup> tr, trace (< 0.5%).

268

269

270

271

272

273

274

275

276



277 For sea buckthorn, the FA composition in seed oil differed significantly from that  
278 in pulp/peel oil. The proportions of linoleic (18:2n6),  $\alpha$ -linolenic (18:3n3), oleic  
279 (18:1n9), palmitic (16:0), stearic (18:0) and vaccenic (18:1n7) acids were found from  
280 high to low in seed oil of most varieties (Table 4). Linoleic acid varied from 34.22 to  
281 52.75% with an average of 42.17%. The proportion of  $\alpha$ -linolenic acid varied from  
282 21.37 to 47.16% with an average of 34.67%. High CV values were observed in oleic  
283 (30.50%) and vaccenic (39.17%) acids. Furthermore, the level of palmitoleic acid  
284 (16:1n7, < 0.5%) was extremely low in seed oil. The FA composition of sea buckthorn  
285 seeds were similar among berries of different origins. Small variations were found in  
286 the proportion of linoleic acid in seed oil (40.44 – 42.87%). Its proportion in hybrids  
287 were slightly higher than in ssp. *mongolica* (42.87% vs 42.10%), and had the highest  
288 value of the samples from three different origins.  $\alpha$ -Linolenic acid showed a little  
289 variation with a bigger proportion in ssp. *mongolica* than in ssp. *sinensis* (35.56% vs  
290 31.78%). A higher proportion of palmitic (7.41% vs 6.38%) and oleic (16.37% vs  
291 13.96%) acids and a lower proportion of stearic acid (2.19% vs 2.23%) were discovered  
292 between the varieties of ssp. *sinensis* and hybrids. The polyunsaturated fatty acids  
293 (PUFA) ratio in hybrids (76.06%) was slightly lower than it was in ssp. *mongolica*  
294 (77.66%) and higher than it was in ssp. *sinensis* (72.22%). Some hybrids (including  
295 ZJ1, Za1-2, Za13-25, Za05-6, LFZ, and ZCY12) contained a high proportion of PUFA  
296 (> 80%) in seed oil, which was more than the average level of ssp. *mongolica* varieties  
297 (S1 Table).

298 In pulp/peel oil, the **dominate** FAs were palmitoleic, palmitic, linoleic, oleic, and  
299 vaccenic acids (Table 4). **High deviations were identified** in the proportion of  
300 palmitoleic (17.93-57.75%), oleic (1.44-23.43%) and vaccenic (3.51-24.24%) acids.  
301 The special feature of pulp/peel oil is high proportions (> 35%) of palmitoleic and  
302 palmitic acids. Compared to *ssp. sinensis*, *ssp. mongolica* contained a higher proportion  
303 of palmitoleic and palmitic acids in the berry pulp/peel ( $p < 0.05$ ) (Table 5). In particular,  
304 the proportions of oleic and vaccenic acids were highest in *ssp. sinensis*, much higher  
305 than **the other two origins**. The relative levels of  $\alpha$ -linolenic and stearic acids in  
306 pulp/peel of *ssp. sinensis* were higher than *ssp. mongolica* ( $p < 0.05$ ) (Table 5). For  
307 hybrids, the proportions of most fatty acids were between *ssp. mongolica* and *ssp.*  
308 *sinensis* varieties, except for linoleic acid. Similar to the results in seed oils, the hybrids  
309 had the highest proportions of linoleic acid (11.53%) and PUFA (12.60%). The  
310 monounsaturated fatty acids (MUFA) ratio in pulp/peel oil of *ssp. sinensis* (57.00%)  
311 was highest and that of *ssp. mongolica* (51.00%) was almost equal to hybrids (51.20%).  
312 In hybrids, the pulp/peel oil of SCY2 contained 39.16% palmitoleic acid, and the  
313 content of MUFA was 60.77%, which was higher than it was in *ssp. sinensis* (S1 Table).

314

## 315 **Correlations among the agronomic traits and oil characters**

316 Canonical analyses allow direct comparisons of two data matrices. All sea buckthorn  
317 **varieties** were represented in a two-dimensional space using CCA between phenotypic  
318 traits and oil characteristics (Fig 3). For berries of different origins, phenotypic  
319 characters (BLD, HBW, BSI, and BTD) of berries and oil traits in pulp/peel showed

320 close correlation ( $r = 0.8725$ ,  $p = 0.0000$ ). Based on CCA, varieties of *ssp. mongolica*  
321 were clustered on the upper side (mainly positive on D1 and D2), those of *ssp. sinensis*  
322 on the other, and the hybrids in the middle in Fig 3A. The positioning of samples in the  
323 first dimension was mostly related to differences in their berry characteristics that were  
324 primarily provided by a marker of BLD. The second dimension indicated differences  
325 in oil contents and FA compositions of pulp/peel oil among sea buckthorn varieties.  
326 Differences between pulp/peel oil traits were primarily related to percentages of oil  
327 content, 16:0 and 16:1n7, which were highest in *ssp. mongolica*, followed by hybrids,  
328 and lowest in *ssp. sinensis*. For seeds of different origins, phenotypic characters (SL,  
329 SW, ST, and HSW) and seed oil traits were correlated ( $r = 0.7482$ ,  $p = 0.0000$ ). The  
330 positioning of samples was staggered (Fig 3B), which reflected that all seed samples  
331 from different origins had relatively little variation among phenotypic traits and oil  
332 characteristics. These results verified the previous analysis (Table 3 and Table 5).

333

334 **Fig 3. Canonical correspondence analysis of phenotypic traits (A. berry; B. seed) and oil**  
335 **characteristics (A. pulp/peel oil; B. seed oil) of sea buckthorn germplasms.** D1, Dimension 1; D2,  
336 Dimension 2. ▲ = *ssp. mongolica*; ● = *ssp. sinensis*; ◇ = hybrid.

337

### 338 **SSR diversity**

339 Twenty pairs of RNA-Seq SSR primers with good amplification and band stability were  
340 used in 78 varieties of sea buckthorn. All the primers amplified 59 bands, of which 51  
341 were polymorphic, accounting for 86.44%. The number of amplified bands per locus

342 ranged from 2 to 5, averaging 2.9500, and the number of effective alleles ( $N_e$ ) ranged  
343 from 1.0392 to 3.1049, averaging 1.6279 (Table 6). SB2, SB3, SB5, SB6, SB8, SB13  
344 and SB16 were informative SSR loci, each revealing more than four effective alleles  
345 distributed among all of the varieties. Compared with the observed allele number ( $N_a$ ),  
346 the number of effective alleles and their average values were lower, which was caused  
347 by the uneven distribution of gene frequencies in SSR loci. In genetic diversity analysis,  
348 observed heterozygosity ( $H_o$ ) ranged from 0.0385 to 0.7051, with an average of 0.2519;  
349 expected heterozygosity ( $H_e$ ) ranged from 0.0377 to 0.6779, with an average of 0.3140,  
350 and the Shannon index ( $I_s$ ) ranged from 0.0950 to 1.2152, with an average of 0.5449.  
351 The value of polymorphism information content (PIC), regarded as discriminating  
352 power, varied from 0.0370 to 0.6174, with an average of 0.2725. Loci SB06 (PIC =  
353 0.6174) and SB08 (PIC = 0.5820) showed higher effectiveness because of their high  
354 informativity, which could be used to construct the fingerprint map of sea buckthorn  
355 germplasm. The characteristics of these 20 loci in genetic diversity analysis of sea  
356 buckthorn germplasm are shown in Table 6.

357

358 **Table 6. Characterization of 20 polymorphic SSR markers in the 78 sea buckthorn varieties.**

| Loci code | $N_a$ | $N_e$  | $H_o$  | $H_e$  | PIC    | $I_s$  |
|-----------|-------|--------|--------|--------|--------|--------|
| SB1       | 3     | 1.2745 | 0.2436 | 0.2154 | 0.2025 | 0.3956 |
| SB2       | 4     | 1.1382 | 0.1282 | 0.1214 | 0.1166 | 0.2791 |
| SB3       | 4     | 2.2372 | 0.4615 | 0.5530 | 0.4627 | 0.9090 |

|      |   |        |        |        |        |        |
|------|---|--------|--------|--------|--------|--------|
| SB4  | 2 | 1.5006 | 0.2692 | 0.3336 | 0.2779 | 0.5160 |
| SB5  | 4 | 2.1129 | 0.3333 | 0.5267 | 0.4735 | 0.9288 |
| SB6  | 4 | 3.1049 | 0.7051 | 0.6779 | 0.6174 | 1.2152 |
| SB7  | 2 | 1.0799 | 0.0769 | 0.0740 | 0.0712 | 0.1630 |
| SB8  | 5 | 2.8490 | 0.3846 | 0.6490 | 0.5820 | 1.1890 |
| SB9  | 2 | 1.1509 | 0.1410 | 0.1311 | 0.1225 | 0.2550 |
| SB10 | 3 | 1.5350 | 0.2949 | 0.3485 | 0.3114 | 0.6253 |
| SB11 | 2 | 1.9287 | 0.1667 | 0.4815 | 0.3656 | 0.6745 |
| SB12 | 3 | 1.2430 | 0.2179 | 0.1955 | 0.1753 | 0.3687 |
| SB13 | 4 | 2.1644 | 0.4231 | 0.5380 | 0.4392 | 0.8687 |
| SB14 | 2 | 1.9987 | 0.3077 | 0.4997 | 0.3750 | 0.6928 |
| SB15 | 2 | 1.0662 | 0.0641 | 0.0620 | 0.0601 | 0.1418 |
| SB16 | 4 | 1.4567 | 0.1923 | 0.3135 | 0.2956 | 0.6427 |
| SB17 | 2 | 1.4175 | 0.3590 | 0.2945 | 0.2512 | 0.4706 |
| SB18 | 2 | 1.0392 | 0.0385 | 0.0377 | 0.0370 | 0.0950 |
| SB19 | 3 | 1.0804 | 0.0641 | 0.0744 | 0.0724 | 0.1804 |
| SB20 | 2 | 1.1803 | 0.1667 | 0.1528 | 0.1411 | 0.2868 |

359 Na, observed number of alleles; Ne, effective number of alleles; Ho, observed heterozygosity; He,

360 expected heterozygosity; PIC, polymorphism information content; Is, Shannon's information index.

361

## 362 **Genetic relationships among sea buckthorn germplasm**

363 The sea buckthorn germplasm in this study originated from *ssp. mongolica* (52  
364 varieties), *ssp. sinensis* (6 varieties) and hybrids (20 varieties). Using 20 polymorphic  
365 SSR markers, the UPGMA dendrogram based on the proportion of shared alleles was  
366 constructed to assess the genetic relationships between the 78 varieties (Fig 4). The  
367 results showed that all the varieties could be divided into two groups (I and II). The  
368 varieties of *ssp. sinensis* (JD, ZGSJ, MHC, ZGSJ<sup>wild</sup>, JPDH and ZXY) and 7 hybrids  
369 (ZCY1, ZCY10, ZCY12, SCY2, SCY5, SCY30, and XZC26) from Dongsheng were  
370 clustered into group I. Among them, 6 cultivars of *ssp. sinensis* had closer relationships  
371 than the hybrids, despite great geographic differences. The second group was divided  
372 into 3 subgroups, namely, IIIa, IIIb, and IIIc. The other 13 hybrids (ZJ1, ZJ2, ZJ3, Za13-  
373 19, Za13-25, Za05-6, Za05-20, Za05-21, Za1-2, Za4, EZ4, Za56, and LFZ) from Fuxin  
374 and Suiling were clustered into IIa. Subgroup IIb and IIc contained 52 varieties of *ssp.*  
375 *mongolica* (introduced from Russia and Mongolia) without exception. In subgroup IIb,  
376 QYSK, LS1, WCF, FX and MZ14 were closely associated, and HS-9, HS12, HS14,  
377 HS18, HS20, HS22, WLGM and KTN clustered together. In subgroup IIc, ZYH, SD,  
378 NR, FL, JYH, YLSD12, SJ3, XE2 and XE3 were closely related, and the other 30  
379 varieties from Suiling clustered together. Overall, the relationship between *ssp.*  
380 *mongolica* and *ssp. sinensis* was relatively distant, and that of hybrids was between the  
381 two. Some hybrids are close to *ssp. sinensis* and others to *ssp. mongolica*.

382

383 **Fig. 4. UPGMA dendrogram of sea buckthorn germplasm based on SSR data (sample**  
384 **abbreviations described in Table 1). ▲ = ssp. *mongolica*; ● = ssp. *sinensis*; ◇ = hybrid.**

385

## 386 Discussion

387 Morphological characteristics, biochemical traits, and microsatellite markers have been  
388 used for germplasm identification and genetic diversity analysis in many horticultural  
389 plants [28–29]. The diversity at morphological, biochemical, and molecular levels of  
390 78 sea buckthorn varieties, composed of 52 from ssp. *mongolica*, 6 from ssp. *sinensis*,  
391 and 20 hybrids, were investigated.

392 The morphological characterization of plant materials with desired traits is an  
393 essential step for the effective use of germplasm [30]. Here, 8 important agronomic  
394 traits were measured among 78 sea buckthorn varieties, and a considerable amount of  
395 variation in morphological traits was found. The berry sizes of berries from **three**  
396 **origins** were significantly different according to the HBW value ( $p = 0.000$ ). Compared  
397 to ssp. *sinensis* berries, ssp. *mongolica* berries were much bigger **on average**. Hybrids  
398 between ssp. *mongolica* and ssp. *sinensis* **were intermediate**. In PC analysis, we plotted  
399 2D plots with PC1 and PC2 scores of phenotypes (Fig 2). PC1 was mainly related with  
400 BTD and HBW, which explained the largest portion of the variance in varieties. The  
401 distribution of 78 varieties on PC1 and PC2 was consistent with their agronomic  
402 characters (Fig 2). These results estimating morphological traits are valuable tools for  
403 identifying variation among plant **germplasms** [28].

404 For biochemical traits, oil content and FA composition in seeds and seedless parts  
405 were selected for their important roles in human health. The oil of sea buckthorn seems  
406 to be a good source of unsaturated fatty acids. The seed oil is rich in PUFA, including  
407 linoleic and  $\alpha$ -linolenic acids. The proportion of PUFA did not differ significantly  
408 among berries from three origins, despite the differences in some morphological  
409 characteristics and in growth conditions. These results were consistent with the  
410 previous studies [14]. The results of the present study and previous investigations also  
411 suggested that the berries of ssp. *mongolica* were a good source of palmitic and  
412 palmitoleic acids in pulp/peel oil and those of ssp. *sinensis* were a good source of oleic  
413 acid, both in seeds and pulp/peel [31]. Although carefully selected for intersubspecies  
414 crosses, some hybrids displayed elite oil traits. For example, the proportion of MUFA  
415 in pulp/peel of SCY2 and of PUFA in seeds of 6 varieties (including ZJ1, Za1-2, Za13-  
416 25, Za05-6, LFZ, and ZCY12) exceeded the average level of varieties of ssp. *mongolica*,  
417 the subspecies of one of their parents. These results demonstrate the effectiveness of  
418 traditional cross breeding in the improvement of native varieties (ssp. *sinensis*), even  
419 though it is time-consuming and has low efficiency.

420 Previous studies found that berry size is a useful indicator of Vc, sugars and acids  
421 in **comparisons of populations** [22, 32]. The nutrients in the seedless fraction were more  
422 concentrated in the small berries of ssp. *sinensis* than in the large berries of ssp.  
423 *mongolica* [31]. In the present study, we analyzed the correlation between agronomic  
424 characteristics and oil traits at different levels (seed and pulp/peel) by CCA. The results  
425 showed phenotypic characteristics (BLD, HBW, BSI, and BTD) of berries and oil traits



426 in pulp/peel were positively correlated ( $r = 0.8725$ ,  $p = 0.0000$ ). BLD, as a promising  
427 marker, provided the primary difference in CCA. Our results illustrated that berry size  
428 had different correlations with various biochemical characteristics in sea buckthorn.

429 Variation of phenotypic traits among germplasms may be attributed to differences  
430 in genetic backgrounds, geographical location, climate, harvest period and berry  
431 maturity, while molecular markers are independent of environmental condition and  
432 growth stage [33]. Twenty polymorphic SSR markers were used to identify 78 sea  
433 buckthorn varieties of different origins. The selected 20 SSR markers detected 2–5  
434 alleles, and their PIC values ranged from 0.0370 to 0.6174 and had an average of 0.2725.  
435 The PIC mean value was significantly lower than that of RAPD, ISSR and SRAP  
436 markers previously reported [18–19, 34], suggesting that the **gene sequences** of these  
437 SSR markers were **conservative** in sea buckthorn germplasm.

438 Based on UPGMA, the 78 varieties were classified into two groups. There is a large  
439 genetic distance between varieties of *ssp. sinensis* and *ssp. mongolica*. Seven varieties  
440 (ZCY1, ZCY10, ZCY12, XZC26, SCY2, SCY5, and SCY30) of hybrids were closely  
441 related to *ssp. sinensis* varieties and clustered into one group. Coincidentally, these  
442 hybrids were also closely related to *ssp. sinensis* varieties on the PCA plot based on 8  
443 agronomic characters. This result illustrated that the diversity of morphological  
444 characters could reflect genetic diversity and be used as markers in agronomy. However,  
445 the other 13 hybrids were close related to *ssp. mongolica* varieties. The separation  
446 among hybrids may be because their parents belonged to subspecies *mongolica* and  
447 *sinensis*. Ruan et al. [18] assessed 14 Chinese, Russian and Mongolian sea buckthorn

448 varieties using RAPD markers and obtained similar results.

449 With the continuous development of high-throughput sequencing technology,  
450 transcriptome databases have become a powerful resource for SSR mining. More and  
451 more RNA-Seq SSRs have been developed and applied to the study of species genetic  
452 diversity and population genetic structure [35–36]. The SSRs obtained by  
453 transcriptomes are associated with many important quantitative traits [37].

454

## 455 **Conclusion**

456 In the present study, 8 phenotypic characteristics, oil traits in seeds and seedless parts,  
457 and 20 SSR markers successfully distinguished all 78 sea buckthorn varieties. In PC  
458 analysis, BTD and HBW in the first PC were the most important characteristics for  
459 distinguishing the varieties. The agronomic traits of berries were closely correlated with  
460 the oil content and FA composition in pulp/peel by CCA. This information will be  
461 valuable for cultivar identification and genotypic diversity analysis in *Hippophae*  
462 *ramnoides*.

463

## 464 **Supporting information**

465 **S1 Fig. 78 berry samples used in this study.** Numbers are the variety codes as listed  
466 in [Table 1](#).

467 (TIF)

468 **S2 Fig. Total ion flow chromatography of 37 FAMES Mix (A) and FAMES in**  
469 **pulp/peel oil in MHC (B).**

470 (TIF)

471 **S1 Table. The morphological characteristics and oil traits of pulp and seeds of 78**  
472 **sea buckthorn varieties studied.**

473 (XLSX)

474 **S2 Table. Primer sequences, annealing temperature, and estimated allelic size of**  
475 **20 SSR markers.**

476 **S3 Table. Allele combinations obtained at the 20 microsatellite loci in 78 sea**  
477 **buckthorn varieties.**

478 (TXT)

479

## 480 **Acknowledgements**

481 The authors are grateful to Hai Guo (Jiuchengong Breeding Base of Sea Buckthorn)  
482 and Jun Zhang (Institute of Selection and Breeding of *Hippophae*) for the collection of  
483 plant materials.

484

## 485 **References**

- 486 1. N, Swenson U, Nybom H. Phylogeny of *Hippophae* (Elaeagnaceae) inferred from parsimony  
487 analysis of chloroplast DNA and morphology. *Syst Bot.* 2002; 27:41–54.
- 488 2. Swenson U and Bartish IV. Taxonomic synopsis of *Hippophae* (Elaeagnaceae). *Nord J Bot.* 2002;  
489 22:369–374.
- 490 3. Kallio H, Lassila M, Järvenpää E, Haraldsson GG, Jonsdottir S, Yang BR. Inositols and  
491 methylinositols in sea buckthorn (*Hippophaë rhamnoides*) berries. *J Chromatogr B.* 2009;

- 492 877:1426–1432.
- 493 4. Chen C, Xu XM, Chen Y, Yu MY, Wen FY, Zhang H. Identification, quantification and antioxidant  
494 activity of acylated flavonol glycosides from sea buckthorn (*Hippophae rhamnoides* ssp. *sinensis*).  
495 Food Chem. 2013; 141, 1573–1579.
- 496 5. Pop MR, Weesepeol Y, Socaciu C, Pintea A, Vincken JP, Gruppen H. Carotenoid composition of  
497 berries and leaves from six Romanian sea buckthorn (*Hippophae rhamnoides* L.) varieties. Food  
498 Chem. 2014; 147:1–9.
- 499 6. Teleszko M, Wojdyło A, Rudzińska M, Oszmiański J, Golis T. Analysis of Lipophilic and  
500 Hydrophilic Bioactive Compounds Content in Sea Buckthorn (*Hippophaë rhamnoides* L.) Berries.  
501 J Agric Food Chem. 2015; 63:4120–4129.
- 502 7. Raffo A, Paoletti F, Antonelli M. Changes in sugar, organic acid, flavonol and carotenoid  
503 composition during ripening of berries of three seabuckthorn (*Hippophae rhamnoides* L.) cultivars.  
504 Eur Food Res Technol. 2004; 219:360–368.
- 505 8. Bal ML, Meda V, Naik NS, Satya S. Sea buckthorn: A potential source of valuable nutrients for  
506 nutraceuticals and cosmoceuticals. Food Res Int. 2011; 44:1718–1727.
- 507 9. Suryakumar G, Gupta A. Medicinal and therapeutic potential of Sea buckthorn (*Hippophae*  
508 *rhamnoides* L.). J Ethnopharmacol. 2011; 138:268–278.
- 509 10. Patel C A, Divakar K, Santani D, Solanki H K, Thakkar JH. Remedial prospective of *Hippophaë*  
510 *rhamnoides* Linn. (sea buckthorn). ISRN Pharmacol. 2012; 2012:1–6.
- 511 11. Suomela JP, Ahotupa M, Yang B, Vasankari T, Kallio H. Absorption of flavonols derived from sea  
512 buckthorn (*Hippophae rhamnoides* L.) and their effect on emerging risk factors for cardiovascular  
513 disease in humans. J Agric Food Chem. 2006; 54:7364–7369.

- 514 12. Grey C, Widén C, Adlercreutz P, Rumpunen K, Duan RD. Antiproliferative effects of sea buckthorn  
515 (*Hippophae rhamnoides* L.) extracts on human colon and liver cancer cell lines. Food Chem.2010;  
516 120: 1004–1010.
- 517 13. Xu YJ, Kaur M, Dhillon SR, Tappia SP, Dhalla SN. Health benefits of sea buckthorn for the  
518 prevention of cardiovascular diseases. J Func Foods. 2011; 3:2–12.
- 519 14. Yang B and Kallio H. Composition and Physiological Effects of Sea Buckthorn Lipids, Trends Food  
520 Sci Technol. 2002; 13:160–167.
- 521 15. Yang B and Kallio H. Fatty acid composition of lipids in sea buckthorn (*Hippophaë rhamnoides* L.)  
522 berries of different origins. J. Agric. Food Chem. 2001; 49:1939–1947.
- 523 16. Ruan CJ, Teixeira da Silva JA, Jin H, Li H, Li DQ. Research and biotechnology in sea buckthorn  
524 (*Hippophae* spp.). Medicinal and Aromatic Plant Science and Biotechnology. 2007; 1: 47–60.
- 525 17. Li H, Ruan CJ, Wang L, Ding J, Tian XJ. Development of RNA-Seq SSR markers and application  
526 to genetic relationship analysis among sea buckthorn germplasm. J Amer Soc Hort Sci. 2017;  
527 142(3):200-208.
- 528 18. Ruan CJ. Genetic relationships among some sea buckthorn cultivars from China, Russia and  
529 Mongolia using RAPD markers. Sci Hort. 2004; 101:417–426.
- 530 19. Li H, Ruan CJ, Teixeira da Silva J, Liu BQ. Associations of SRAP markers with dried-shrink disease  
531 resistance in a germplasm collection of sea buckthorn (*Hippophae* L.). Genome. 2010; 53:447–457.
- 532 20. Kalia RK, Rai MK, Kalia S, Singh R, Dhawan AK. Microsatellite markers: An overview of the  
533 recent progress in plants. Euphytica. 2011; 177:309–334.
- 534 21. Jain A, Chaudhary S, Sharma PC. Mining of microsatellites using next generation sequencing of  
535 seabuckthorn (*Hippophae rhamnoides* L.) transcriptome. Physiol. Mol. Biol. Plants. 2014; 20:115–

- 536 123.
- 537 22. Tang X and Tigerstedt PMA. Variation of physical and chemical characters within an elite sea  
538 buckthorn (*Hippophae rhamnoides* L.) breeding population. *Sci. Hort.* 2001; 88(3):203–214.
- 539 23. Christie WW. A simple procedure for rapid transmethylation of glycerolipids and cholesteryl esters.  
540 *J Lipid Res.* 1982; 23:1072-1075.
- 541 24. Peakall R and Smouse PE. GENALEX 6: Genetic analysis in Excel. Population genetic software  
542 for teaching and research. *Mol Ecol Notes.* 2006; 6:288–295.
- 543 25. Peakall R and Smouse PE. GenAlEx 6.5: Genetic analysis in Excel. Population genetic software for  
544 teaching and research – An update. *Bioinformatics.* 2012; 28:2537–2539.
- 545 26. Liu K and Muse SV. PowerMarker: An integrated analysis environment for genetic marker analysis.  
546 *Bioinformatics.* 2005; 21:2128–2129.
- 547 27. Tamura SK, Peterson GD, Filipiński A, Kumar S. MEGA6: Molecular evolutionary genetics analysis  
548 version 6.0. *Mol Biol Evol.* 2013; 30:2725–2729.
- 549 28. Lee ON and Park HY. Assessment of genetic diversity in cultivated radishes (*Raphanus sativus*) by  
550 agronomic traits and SSR markers. *Sci Hort.* 2017; 223:19-30.
- 551 29. Goodarzi S, Khadivi A, Abbasifar A, Akramian M. Phenotypic, pomological and chemical  
552 variations of the seedless barberry (*Berberis vulgaris* L. var. *asperma*). *Sci Hort.* 2018; 238:38–50.
- 553 30. Santos RC, Pires JL, Correa RX. Morphological characterization of leaf, flower, fruit and seed traits  
554 among Brazilian *Theobroma* L. species. *Genet. Resour. Crop Evol.* 2012; 59:327–345.
- 555 31. Kallio H, Yang B, Peippo P, Tahvonen R, Pan R. Triacylglycerols, glycerophospholipids,  
556 tocopherols and tocotrienols in sea buckthorn *Hippophae rhamnoides* L. ssp. *sinensis* and ssp.  
557 *mongolica* berries and seeds. *J. Agric. Food Chem.* 2002; 50:3004–3009.

- 558 32. Kallio H, Yang B, Peippo P. Effects of Different Origins and Harvesting Time on Vitamin C,  
559 Tocopherols, and Tocotrienols in Sea Buckthorn (*Hippophae rhamnoides*) Berries. *J. Agric. Food*  
560 *Chem.* 2002; 50:6136–6142.
- 561 33. Ali M, Rajewski J, Baenziger P, Gill K, Eskridge KM, Dweikat I. Assessment of genetic diversity  
562 and relationship among a collection of US sweet sorghum germplasm by SSR markers. *Mol. Breed.*  
563 2008; 21:497–509.
- 564 34. Li, H., C.J. Ruan, and J.A. Teixeira da Silva. 2009. Identification and genetic relationship based on  
565 ISSR analysis in a germplasm collection of sea buckthorn (*Hippophae* L.) from China and other  
566 countries. *Sci. Hort.* 123:263–271.
- 567 35. Liu YL, Zhang PF, Song ML, Hou JL, Qing M, Wang WQ, Liu CS. Transcriptome analysis and  
568 development of SSR molecular markers in *Glycyrrhiza uralensis* Fisch. *PLoS One.* 2015;  
569 10:e0143017. doi:10.1371/journal.pone.0143017
- 570 36. Zhang LW, Li YR, Tao AF, Fang PP, Qi JM. Development and characterization of 1,906 EST-SSR  
571 markers from unigenes in jute (*Corchorus* spp.), *PLoS One.* 2015; 10(10):e0140861.  
572 doi:10.1371/journal.pone.0140861
- 573 37. Ramchiary N, Nguyen VD, Li X, Hong CP, Dhandapani V, Choi SR, et al. Genic microsatellite  
574 markers in *Brassica rapa*: Development, characterization, mapping, and their utility in other  
575 cultivated and wild *Brassica* relatives. *DNA Res.* 2011; 18:305-320.

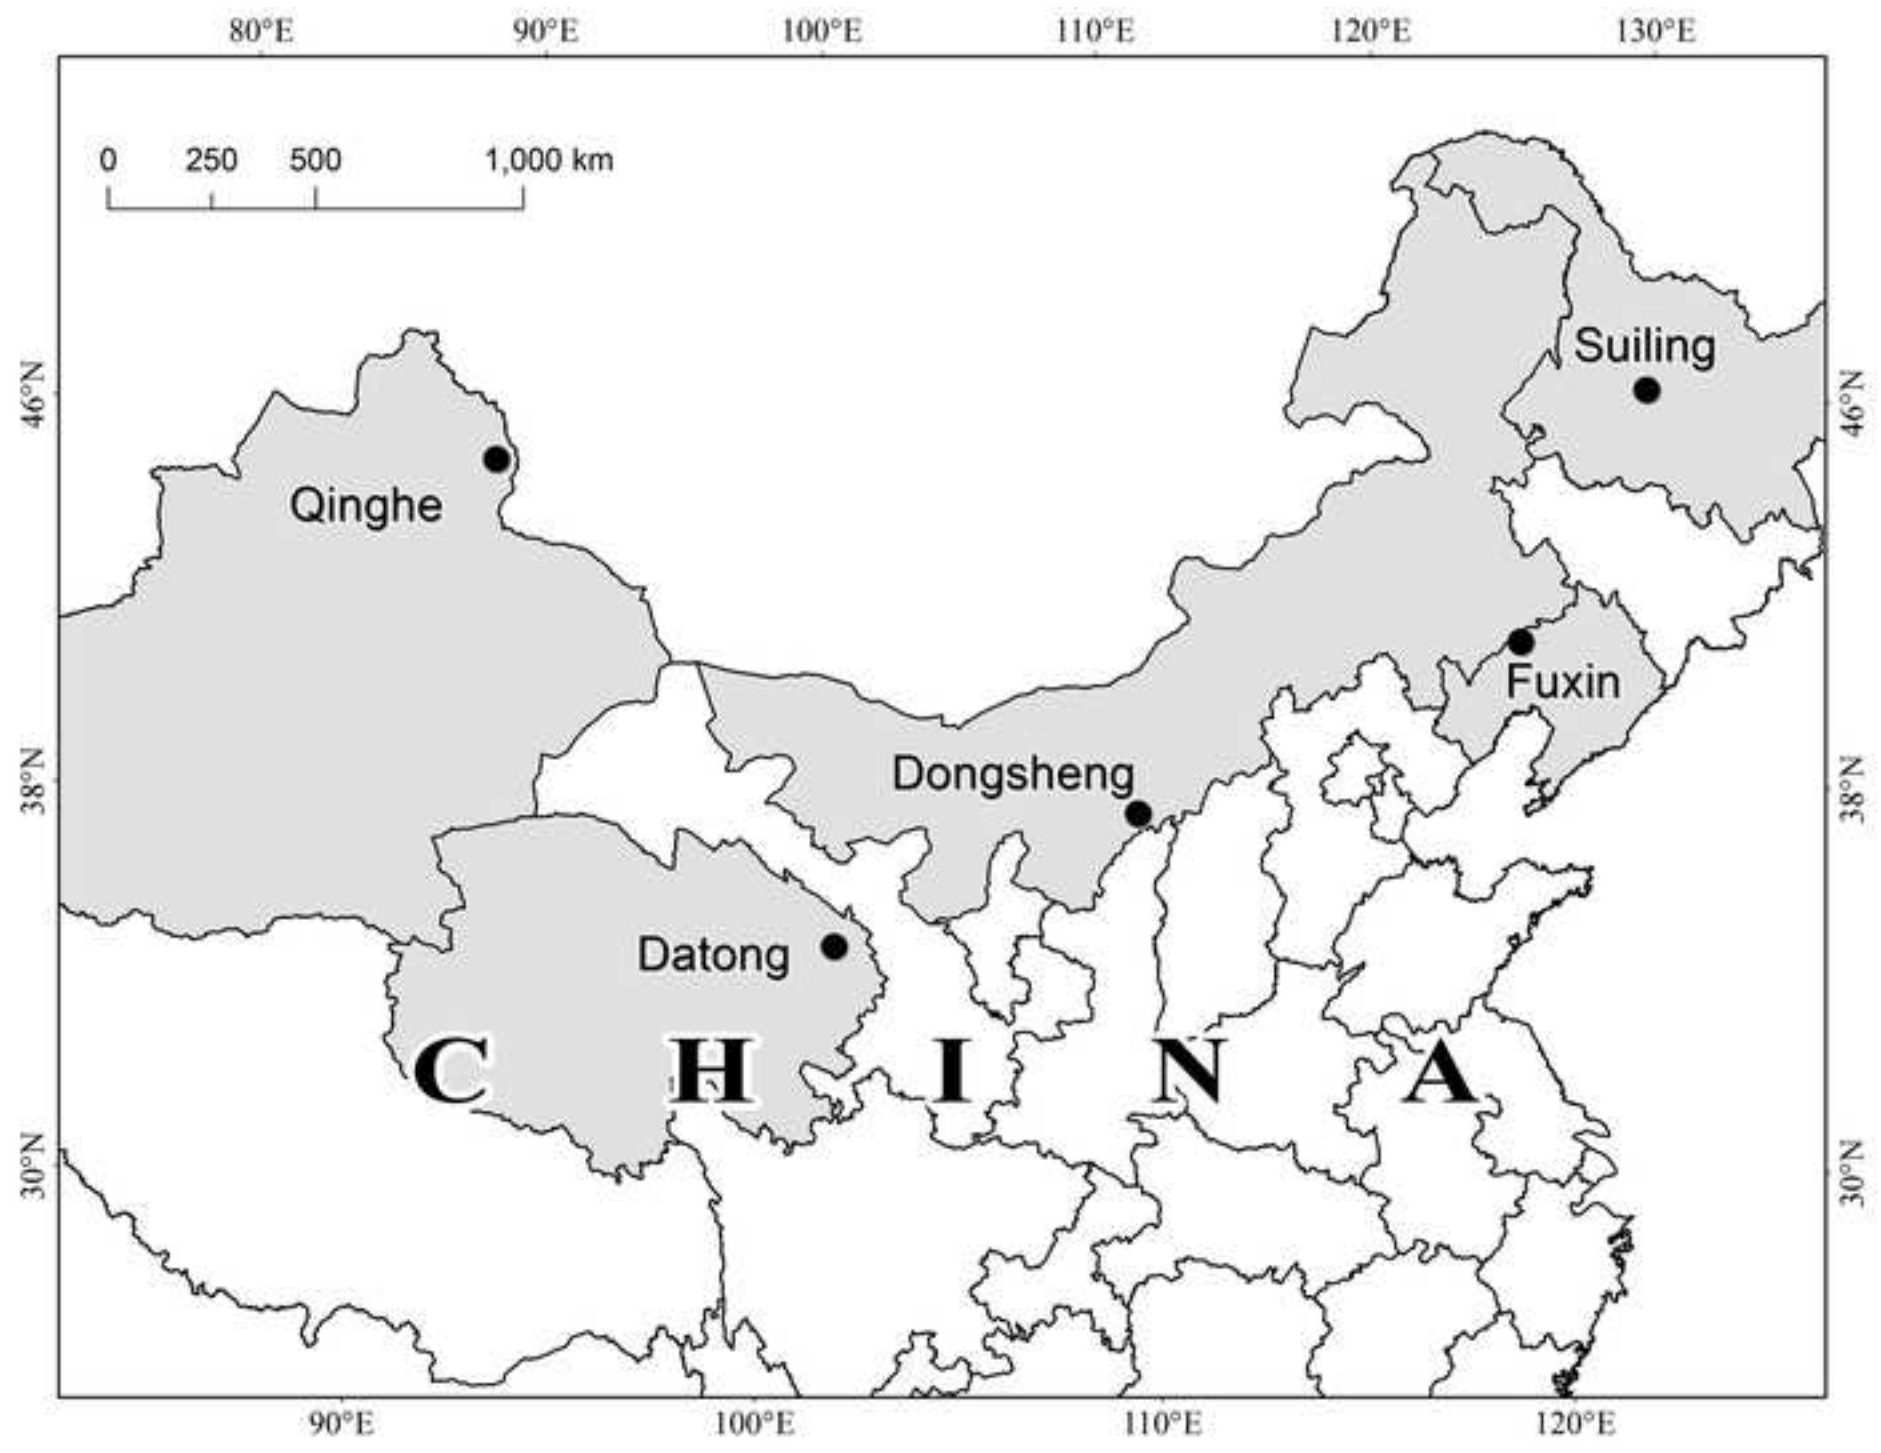



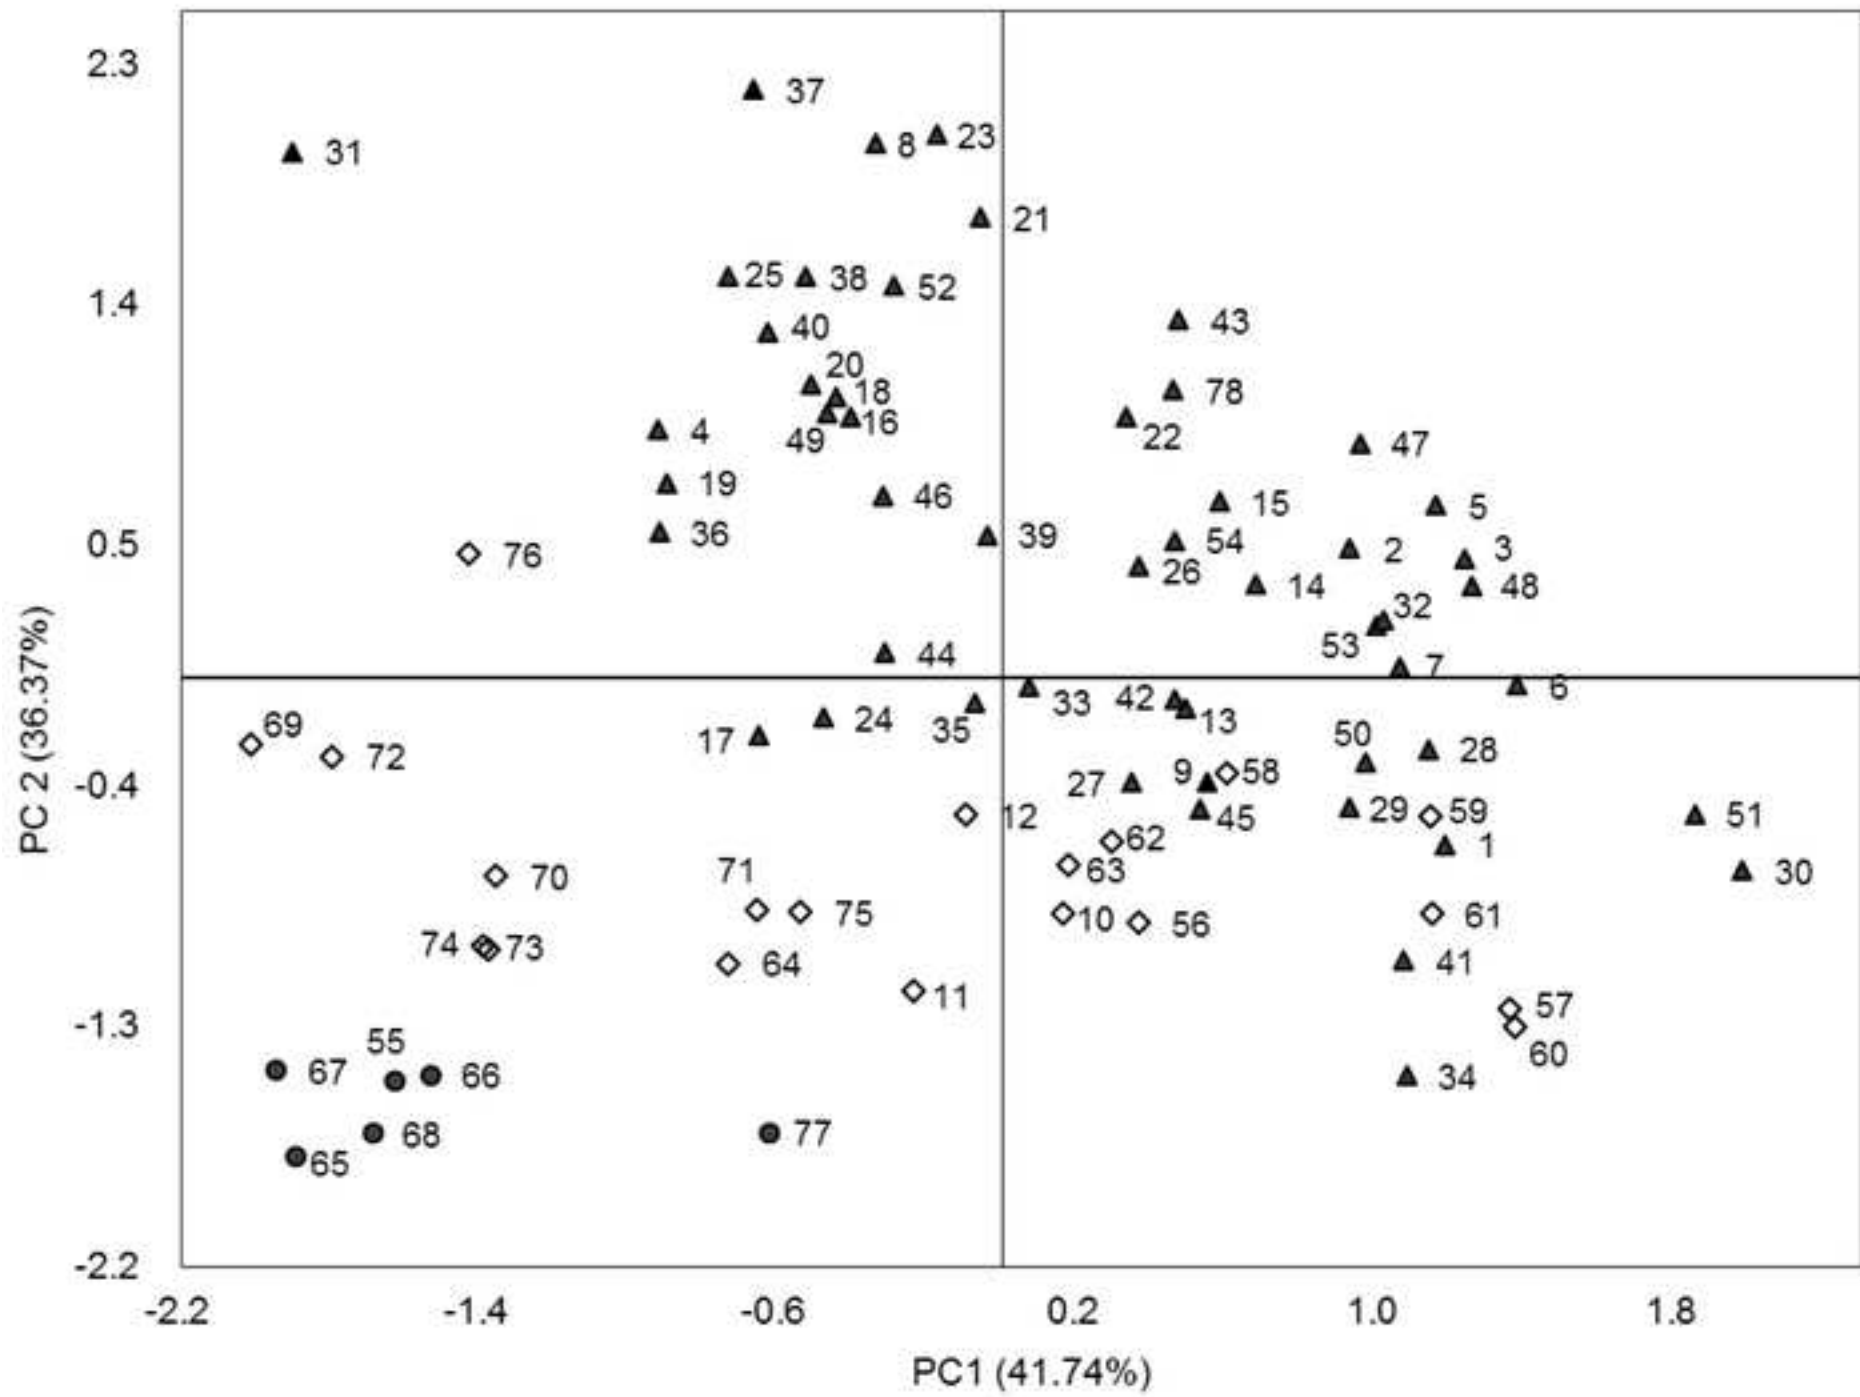

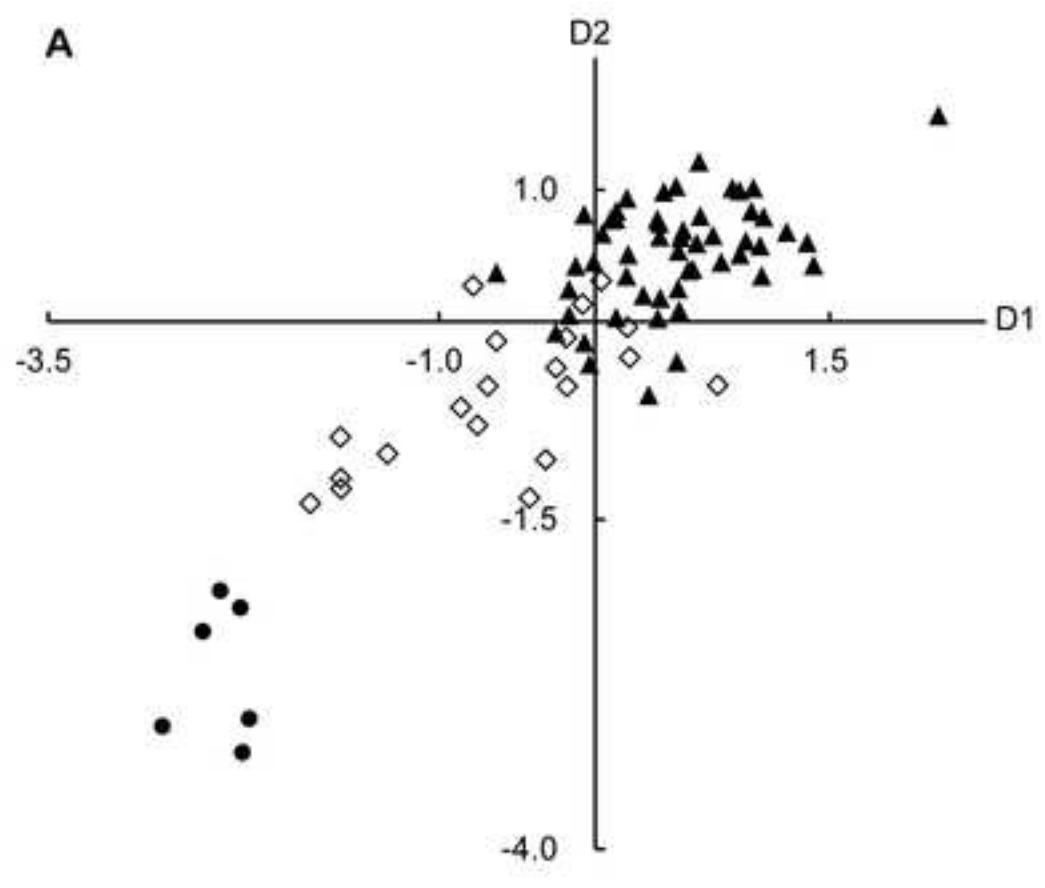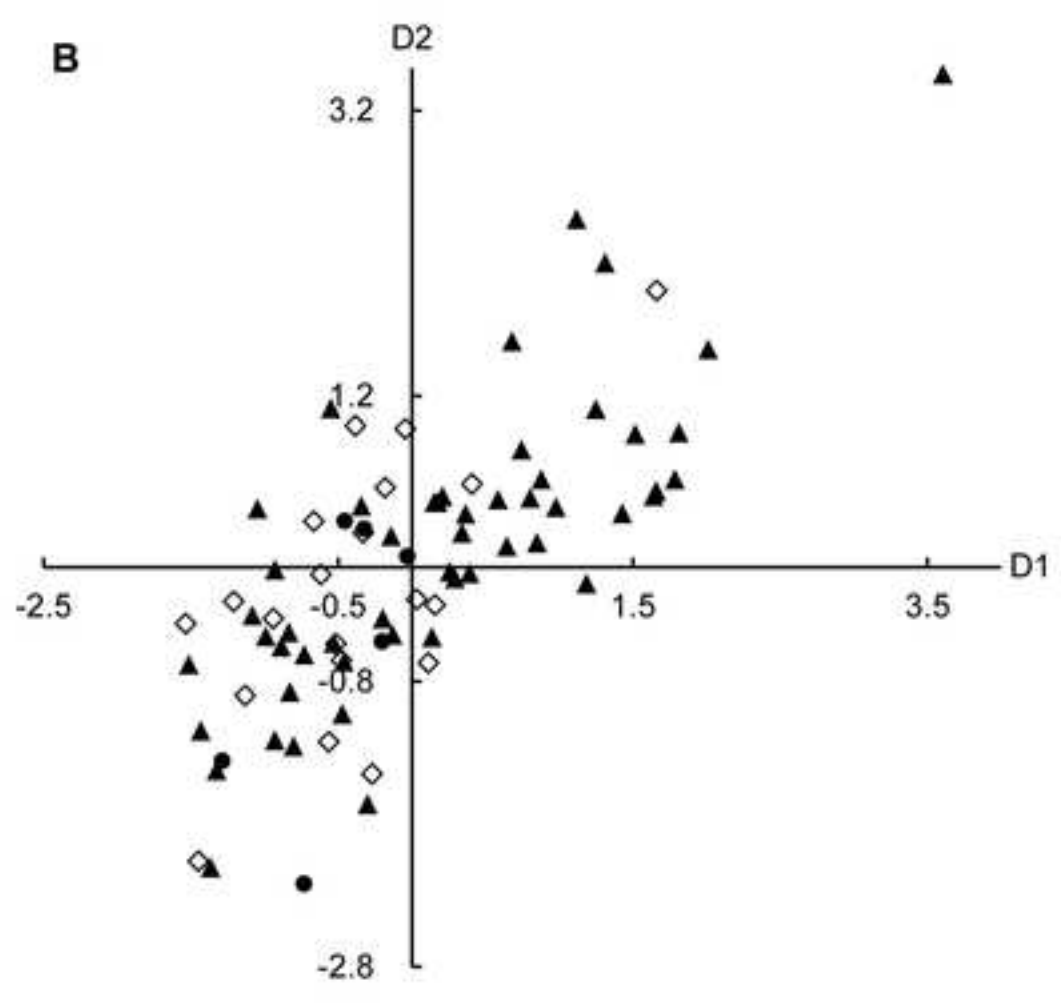

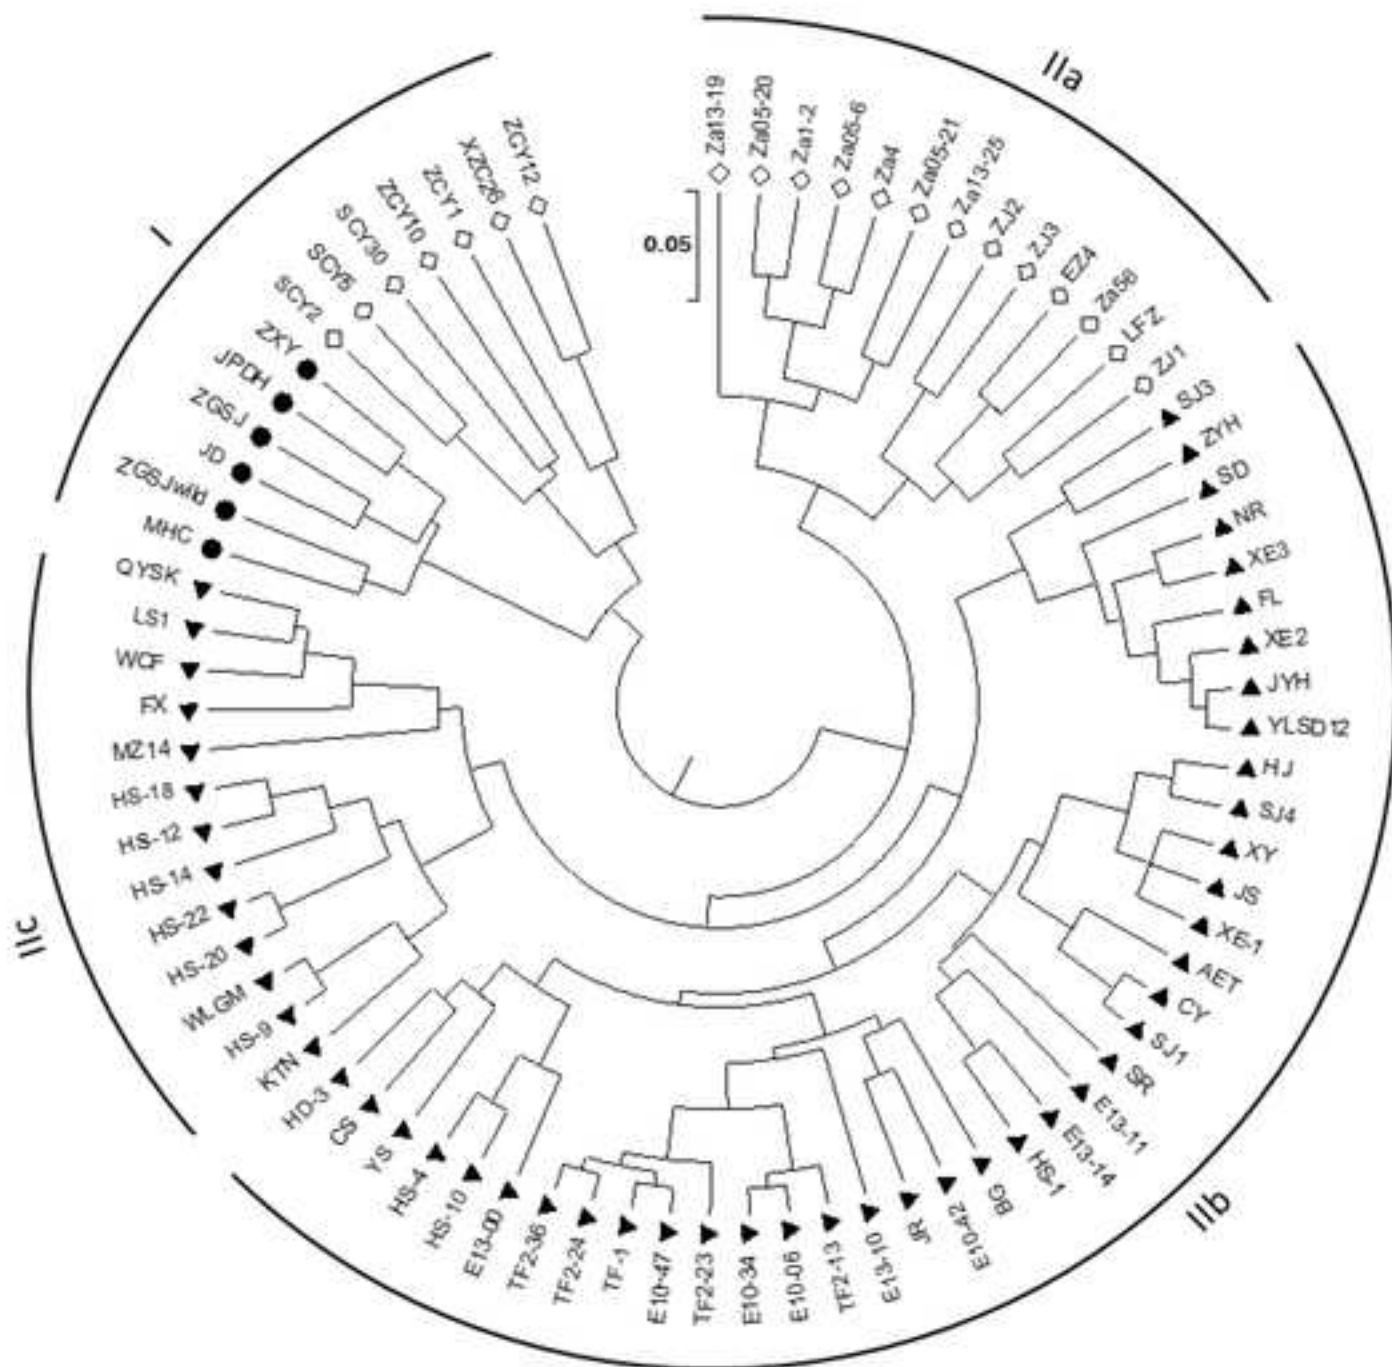

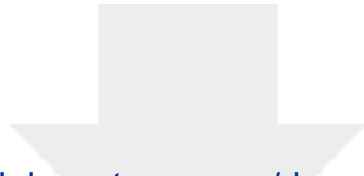

Click here to access/download  
**Supporting Information**  
S1\_Fig.tif.tif

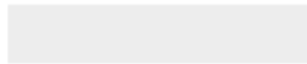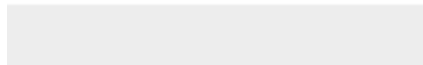



Click here to access/download  
**Supporting Information**  
S1\_Table.xlsx.xlsx

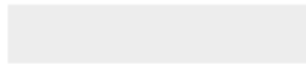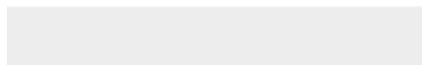



Click here to access/download  
**Supporting Information**  
S2\_Fig.tif.tif

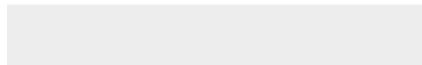

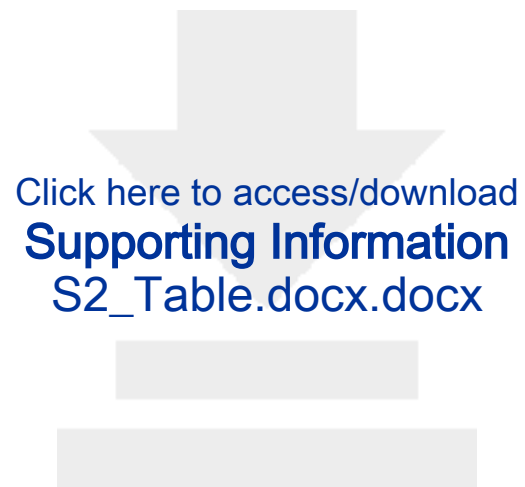

Click here to access/download  
**Supporting Information**  
S2\_Table.docx.docx



Click here to access/download  
**Supporting Information**  
S3\_Table.txt.txt



Supplement: pone.0230356.s011.pdf [file pone.0230356.s011.pdf]
