# Supplementary material for: Diversity in sea buckthorn (Hippophae rhamnoides L.) accessions with different origins based on morphological characteristics, oil traits, and microsatellite markers
Source: PubMed Central journal article supplement (PMC7069629; doi:10.1371/journal.pone.0230356), 2020-03-13

# PLOS ONE

## Diversity in sea buckthorn (*Hippophae rhamnoides* L.) accessions with different origins based on morphological characteristics, oil traits, and microsatellite markers

--Manuscript Draft--

|                               |                                                                                                                                                                                                                                                                                                                                                                                                                                                                                                                                                                                                                                                                                                                                                                                                                                                                                                                                                                                                                                                                                                                                                                                                                                                                                                                                                                                                                                                                                                                                                                                                                                                                                                                                                                                                                                                                                                                                                                                                                                                                                                                                                                                                                                                                                |
|-------------------------------|--------------------------------------------------------------------------------------------------------------------------------------------------------------------------------------------------------------------------------------------------------------------------------------------------------------------------------------------------------------------------------------------------------------------------------------------------------------------------------------------------------------------------------------------------------------------------------------------------------------------------------------------------------------------------------------------------------------------------------------------------------------------------------------------------------------------------------------------------------------------------------------------------------------------------------------------------------------------------------------------------------------------------------------------------------------------------------------------------------------------------------------------------------------------------------------------------------------------------------------------------------------------------------------------------------------------------------------------------------------------------------------------------------------------------------------------------------------------------------------------------------------------------------------------------------------------------------------------------------------------------------------------------------------------------------------------------------------------------------------------------------------------------------------------------------------------------------------------------------------------------------------------------------------------------------------------------------------------------------------------------------------------------------------------------------------------------------------------------------------------------------------------------------------------------------------------------------------------------------------------------------------------------------|
| <b>Manuscript Number:</b>     | PONE-D-19-17567R2                                                                                                                                                                                                                                                                                                                                                                                                                                                                                                                                                                                                                                                                                                                                                                                                                                                                                                                                                                                                                                                                                                                                                                                                                                                                                                                                                                                                                                                                                                                                                                                                                                                                                                                                                                                                                                                                                                                                                                                                                                                                                                                                                                                                                                                              |
| <b>Article Type:</b>          | Research Article                                                                                                                                                                                                                                                                                                                                                                                                                                                                                                                                                                                                                                                                                                                                                                                                                                                                                                                                                                                                                                                                                                                                                                                                                                                                                                                                                                                                                                                                                                                                                                                                                                                                                                                                                                                                                                                                                                                                                                                                                                                                                                                                                                                                                                                               |
| <b>Full Title:</b>            | Diversity in sea buckthorn ( <i>Hippophae rhamnoides</i> L.) accessions with different origins based on morphological characteristics, oil traits, and microsatellite markers                                                                                                                                                                                                                                                                                                                                                                                                                                                                                                                                                                                                                                                                                                                                                                                                                                                                                                                                                                                                                                                                                                                                                                                                                                                                                                                                                                                                                                                                                                                                                                                                                                                                                                                                                                                                                                                                                                                                                                                                                                                                                                  |
| <b>Short Title:</b>           | Diversity in sea buckthorn accessions based on morphological characteristics, oil traits, and SSR markers                                                                                                                                                                                                                                                                                                                                                                                                                                                                                                                                                                                                                                                                                                                                                                                                                                                                                                                                                                                                                                                                                                                                                                                                                                                                                                                                                                                                                                                                                                                                                                                                                                                                                                                                                                                                                                                                                                                                                                                                                                                                                                                                                                      |
| <b>Corresponding Author:</b>  | Chengjiang Ruan<br>Dalian Medical University<br>Dalian, CHINA                                                                                                                                                                                                                                                                                                                                                                                                                                                                                                                                                                                                                                                                                                                                                                                                                                                                                                                                                                                                                                                                                                                                                                                                                                                                                                                                                                                                                                                                                                                                                                                                                                                                                                                                                                                                                                                                                                                                                                                                                                                                                                                                                                                                                  |
| <b>Keywords:</b>              | diversity analysis; morphological characteristics; SSR markers; biochemical traits; fatty acid composition                                                                                                                                                                                                                                                                                                                                                                                                                                                                                                                                                                                                                                                                                                                                                                                                                                                                                                                                                                                                                                                                                                                                                                                                                                                                                                                                                                                                                                                                                                                                                                                                                                                                                                                                                                                                                                                                                                                                                                                                                                                                                                                                                                     |
| <b>Abstract:</b>              | <p>Sea buckthorn (<i>Hippophae rhamnoides</i>) is an ecologically and economically important species. Here, we assessed the diversity of 78 accessions cultivated in northern China using 8 agronomic characteristics, oil traits (including oil content and fatty acid composition) in seeds and fruit pulp, and SSR markers at 23 loci. The 78 accessions included 52 from <i>ssp. mongolica</i>, 6 from <i>ssp. sinensis</i>, and 20 hybrids. To assess the phenotypic diversity of these accessions, 8 agronomic fruit traits were recorded and analyzed using principal component analysis (PCA). The first two PCs accounted for approximately 78% of the variation among accessions. The oil contents were higher in pulp (3.46-38.56%) than in seeds (3.88-8.82%), especially in <i>ssp. mongolica</i> accessions. The polyunsaturated fatty acid (PUFA) ratio was slightly lower in the seed oil of hybrids (76.06%) than that of in <i>ssp. mongolica</i> (77.66%) and higher than that of in <i>ssp. sinensis</i> (72.22%). The monounsaturated fatty acid (MUFA) ratio in the pulp oil of <i>ssp. sinensis</i> (57.00%) was highest, and that in <i>ssp. mongolica</i> (51.00%) was approximately equal to the ratio in the hybrids (51.20%). Using canonical correspondence analysis (CCA), we examined the correlation between agronomic traits and oil characteristics in pulp and seeds. Oil traits in pulp from different origins were correlated with morphological groupings (<math>r = 0.8725</math>, <math>p = 0.0000</math>). To assess the genotypic diversity, 23 SSR markers (including 17 loci previously reported) were used among the 78 accessions with 59 polymorphic amplified fragments obtained and an average PIC value of 0.2845. All accessions were classified into two groups based on the UPGMA method. The accessions of <i>ssp. sinensis</i> and <i>ssp. mongolica</i> were genetically distant. The hybrid accessions were close to <i>ssp. mongolica</i> accessions. The 8 agronomic traits, oil characteristics in seed and pulp oils, and 23 SSR markers successfully distinguished the 78 accessions. These results will be valuable for cultivar identification and genetic diversity analysis in cultivated sea buckthorn.</p> |
| <b>Order of Authors:</b>      | <p>He Li</p> <p>Chengjiang Ruan</p> <p>Jian Ding</p> <p>Jingbin Li</p> <p>Li Wang</p> <p>Xingjun Tian</p>                                                                                                                                                                                                                                                                                                                                                                                                                                                                                                                                                                                                                                                                                                                                                                                                                                                                                                                                                                                                                                                                                                                                                                                                                                                                                                                                                                                                                                                                                                                                                                                                                                                                                                                                                                                                                                                                                                                                                                                                                                                                                                                                                                      |
| <b>Response to Reviewers:</b> | <p>General Comments:</p> <p>The manuscript has a lot of issues with the language. Many such sentences have been highlighted in the document attached. Some of these appear as two half statements fused. At other places, the sentences lack clarity. The authors need to re-frame all such statements.</p> <p>Response: Thank you for the valuable suggestion. The sentences mentioned above are all re-framed with clarity. And the revised manuscript was professionally edited by</p>                                                                                                                                                                                                                                                                                                                                                                                                                                                                                                                                                                                                                                                                                                                                                                                                                                                                                                                                                                                                                                                                                                                                                                                                                                                                                                                                                                                                                                                                                                                                                                                                                                                                                                                                                                                      |

American Journal Experts (AJE, ID: HS1GCXH7) for the improvement in English quality.

The Materials & Methods needs to be revised at places (please see suggestions). Most trait measures in various tables lack the unit of measurements. Please incorporate that.  
Response: Thank you for the valuable suggestion. The places mentioned above in the Materials & Methods have been revised according to the reviewers' suggestions. And the unit of measurements has been added in the tables of the revised manuscript.

Specific comments:

1. The text contradictorily mentions the deployment of 20 SSR primer pairs at certain places (line 357, 450, Header of Table 5) and at other places (Line 27, 41, 46, 197, 358, 373, 383, 451, 482) the use of 23 SSR primer pairs has been mentioned. The supplementary table (S4) gives sequence information for 23, while its header says 20 SSR primers. Table 5, gives information for 23 markers although the Header says 20. Please ensure that all these ambiguities are taken care of.

Response: Twenty-three SSR primer pairs were used in this study. The number '20' at certain places (line 357, 450, Headers of Table 5 and S4 Table) have been replaced by 23 in the revised manuscript.

2. Abstract says 69 polymorphic bands, while in results 59 polymorphic bands are mentioned. This ambiguity also needs to be addressed.

Response: The number of polymorphic bands is 59. It has been revised in the abstract of the revised manuscript.

Introduction:

1. Line 62: 'Two important parameters in.....oil quantity are oil content'. Oil content cannot be a parameter of oil quality. So, this statement needs modification.

Response: The authors agreed with this opinion. The oil content is a parameter of oil yield. The sentence has been revised as bellow.

'Two important parameters in analyzing oil yield and quality are oil content and fatty acid (FA) composition (referred to here as 'oil traits' for simplicity).'

2. Line 78: 'Due to small berries.....artificial hybridization for elite accessions.' The statement needs to be reframed.

Response: Thank you for the valuable suggestion. The statement is reframed as bellow.

'Due to the small berries and thorns of native cultivars (ssp. sinensis), which result in little economic value, the breeding of sea buckthorn has undergone different stages of development in China, such as introduction, domestication, seedling selection and artificial hybridization for elite accessions.'

3. Line 98: 'The diversity analysis.....germplasm'. The authors appear to have fused to incomplete sentences. This needs to be re-written.

All other such statements have been highlighted in the document attached.

Response: Thank you for the valuable suggestion. All such statements are re-written in the revised manuscript.

Materials & Methods

1. Line 139: 'There were three biological replicates.....measurement'.

Do the authors mean that 300 berries were taken for the analysis? 100 berries from 2-5 plants/ accession is a good enough number for the analysis.

Response: Yes. 300 berries were taken for the analysis. We collected more than 300 berries per accession and the analyses of other nutrients were performed in our research work, e.g. vitamin C, vitamin E and carotenoids.

2. Line 142: '...with over 20 measurements...for each'

This is not clear. Do the authors mean 20 berries per accession?? And how many plants did these berries belong to?

Response: The authors agreed with this view. It means averaged 20 determinations were done for each character. These berries were selected from the berry samples randomly collected from 2-5 ramet plants per accession. This sentence mentioned above has been re-framed for clarity in the revised manuscript as bellow.

'The transverse and longitudinal diameters of berries (BTD and BLD) and the length,

width and thickness of seeds (SL, SW and ST) were measured over 20 times each (on average) by micrometer calipers.'

3. For the oil extraction, were the seeds and fruit pulp weighed prior to oil extraction to maintain some uniformity. This has not been mentioned in the M&M.

The oil contents in both seeds and fruit pulp as mentioned in Line 153 is expressed as percentage. Percentage of what? Seed/pulp weight? The authors need to clearly mention that in the M&M.

In the results (Line 278), the authors mention '...highest oil content (24.68%) based on dry weight.' This means that the weight of the pulp/seed was considered. But, this has not been clearly mentioned either in the M&M or in the Table 3. The units for oil characteristic (min and max) have not been mentioned in the table.

Reponse: Thank you for the valuable suggestion. The method of lipid extraction was described by Yang and Kallio (2001). Samples (1 g) of seeds and fruit pulp were isolated from freeze-dried berries and lipids from the samples were extracted with chloroform/methanol (2:1, v/v) with mechanical homogenization of the tissues. The oil contents (percentages) in seeds and fruit pulp were calculated (oil % in seeds and lyophilized fruit pulp). The fatty acid composition was also expressed as a weight percentage of the total fatty acids. The units (weight percentages) for oil characteristics in Table 3 and Table 4 have been added in the revised manuscript.

4. Line 197: 'Twenty-three polymorphic microsatellite loci (SSR) developed using RNA-Seq was evaluated and loci SB1-SB17 were previously reported'.

Please mention here the names of the SSR markers (SB1-SB23). Nowhere in the text have they been mentioned except for tables. Then it can be mentioned that SB1-17 were previously deployed (Ref. 14).

The authors need to clearly mention in the introduction itself that in a previous study, RNA seq analysis was done to generate SSR markers and these were tested on 31 accessions. The 17 SSR markers developed in that study have been utilized in the present endeavor for genetic diversity assessment of larger set of accessions. This description in the 'introduction' will bring more clarity in the text. This previous study and its outcomes should be mentioned clearly in the 'Introduction' so that its extension in the present study can be deciphered.

Reponse: Thank you for the valuable suggestion. The sentences mentioned above have been re-framed for clarity in the revised manuscript as bellow.

'Twenty-three polymorphic microsatellite loci (SB1-SB23) developed using RNA-Seq were evaluated. Of these, 17 (SB1-SB17) had been deployed in a previous study by the group [14].'

And the authors added the statements of 17 RNA-Seq SSR markers developed in our previous study and mentioned these SSR markers have been utilized in the present endeavor for genetic diversity assessment of larger set of accessions in the revised manuscript.

'In our previous study, 17 RNA-Seq SSR markers (SB1-SB17) were developed and validated on 31 accessions, which were utilized in the present study for genetic diversity assessment of larger set of accessions [14].'

#### Results

1. Line 246: 'In previous multilocation trials in Suiling (47°14'N, 127°06'E; 202 m) and Dengkou (40°43'N, 106°30'E; 1053m, Inner Mongolia), the fruit characteristics of 11 large.....'.

How many berries per accession were taken for this analysis? The data should be represented as + SD in Table S7.

Reponse: 300 berries of each cultivar were randomly sampled and divided into 3 groups (100 berries were divided into 1 group) to determine the hundred berry weight (HBW). 20 berries of each cultivar were randomly sampled to determine the transverse, longitudinal diameters of berries and berry shape indices (BTD, BLD and BSI). The data has been represented as + SD in S7 Table in the revised manuscript.

2. Line 302: 'Small variations were found in the proportion of linoleic acid in seed oil (40.44 – 42.87%). Its proportion in hybrids were slightly higher than in ssp. mongolica (42.87% vs 42.10%.....'

Are these differences significant?

Reponse: These differences are significant despite small variations. The content of seed oil in hybrids is lower than that in ssp. mongolica. However, the proportion of linoleic acid (an important polyunsaturated fatty acid) in seed oil is higher in hybrids

|                                                                                                                                                                                                                                                                                                                                                                                                                                                                                |                                                                                                                                                                                                                                                                                                                                                                                                                                                                                                                                                                                                                                                                                                                                                                                                                                                                                                                                                                                                                                                                                                                                                                                                                                                                                                                                                                                                                                                                                                                                                                                                                                                                                                                                                                                                                                                                                                                                                                                                                                                                                                                                                                                                                                                                                                                                                                                                                                                                                                                                                                                                                                                          |
|--------------------------------------------------------------------------------------------------------------------------------------------------------------------------------------------------------------------------------------------------------------------------------------------------------------------------------------------------------------------------------------------------------------------------------------------------------------------------------|----------------------------------------------------------------------------------------------------------------------------------------------------------------------------------------------------------------------------------------------------------------------------------------------------------------------------------------------------------------------------------------------------------------------------------------------------------------------------------------------------------------------------------------------------------------------------------------------------------------------------------------------------------------------------------------------------------------------------------------------------------------------------------------------------------------------------------------------------------------------------------------------------------------------------------------------------------------------------------------------------------------------------------------------------------------------------------------------------------------------------------------------------------------------------------------------------------------------------------------------------------------------------------------------------------------------------------------------------------------------------------------------------------------------------------------------------------------------------------------------------------------------------------------------------------------------------------------------------------------------------------------------------------------------------------------------------------------------------------------------------------------------------------------------------------------------------------------------------------------------------------------------------------------------------------------------------------------------------------------------------------------------------------------------------------------------------------------------------------------------------------------------------------------------------------------------------------------------------------------------------------------------------------------------------------------------------------------------------------------------------------------------------------------------------------------------------------------------------------------------------------------------------------------------------------------------------------------------------------------------------------------------------------|
|                                                                                                                                                                                                                                                                                                                                                                                                                                                                                | <p>than that in ssp. mongolica, which showed high oil quality of seed oil in hybrids.</p> <p>3. Table 4: How is the oil content being measured? Total oil per gram weight of seeds and pulp or some other measure?<br/> Reponse: The method of lipid extraction was described by Yang and Kallio (2001). Samples (1 g) of seeds and fruit pulp were isolated from freeze-dried berries and lipids from the samples were extracted with chloroform/methanol (2:1, v/v) with mechanical homogenization of the tissues. The oil contents (percentages) in seeds and fruit pulp were calculated (oil % in seeds and lyophilized fruit pulp).</p> <p>Tables and Figures</p> <p>1. Table 1: Since the authors have already mentioned that 2-5 ramet plants were collected per accession. The columns indicating the number of plants taken per accession can be removed from the Table.<br/> Reponse: The columns indicating the number of plants taken per accession have been removed from Table 1 in the revised manuscript.</p> <p>2. Table 3: The units for the min. and max values of the oil characteristics have not been mentioned in the table. Similarly mention the units of measurement for each of the component in Table 4.<br/> Reponse: The units of the oil characteristics have been added in the headers of Table 3 and Table 4.</p> <p>3. Table 3 &amp; 4: The different fatty acid names should be included in the first column. Example: Oleic (18:1), Palmitic acid (16:0) etc.<br/> Reponse: Thank you for the valuable suggestion. The different fatty acid names are included in the first column of Table 3 and Table 4 according to the examples.</p> <p>4. Table S1: This table again classifies all the lines used as ‘cultivars’. Are these accessions or cultivars? Please check.<br/> Reponse: The ‘accession’ has replaced the ‘cultivar’ in S1 Table of revised manuscript.</p> <p>5. Table S3 carries a different header than the one that has been listed at the end of the manuscript. Please change that.<br/> Reponse: The header of S3 Table listed at the end of the manuscript has been changed in the revised manuscript.</p> <p>6. Table S7: The header for this table has been titled as Table S5. Please correct. Also it mentions ‘two experimental fields’ although it has data from three places. So, please correct.<br/> Reponse: The header for S7 Table has been corrected. The mutilocation trials were performed in two experimental fields (Suiling and Dengkou). Russia is the country of origin of those cultivars and the related data were provided by the units where they were introduced.</p> |
| <b>Additional Information:</b>                                                                                                                                                                                                                                                                                                                                                                                                                                                 |                                                                                                                                                                                                                                                                                                                                                                                                                                                                                                                                                                                                                                                                                                                                                                                                                                                                                                                                                                                                                                                                                                                                                                                                                                                                                                                                                                                                                                                                                                                                                                                                                                                                                                                                                                                                                                                                                                                                                                                                                                                                                                                                                                                                                                                                                                                                                                                                                                                                                                                                                                                                                                                          |
| <b>Question</b>                                                                                                                                                                                                                                                                                                                                                                                                                                                                | <b>Response</b>                                                                                                                                                                                                                                                                                                                                                                                                                                                                                                                                                                                                                                                                                                                                                                                                                                                                                                                                                                                                                                                                                                                                                                                                                                                                                                                                                                                                                                                                                                                                                                                                                                                                                                                                                                                                                                                                                                                                                                                                                                                                                                                                                                                                                                                                                                                                                                                                                                                                                                                                                                                                                                          |
| <p><b>Financial Disclosure</b></p> <p>Enter a financial disclosure statement that describes the sources of funding for the work included in this submission. Review the <a href="#">submission guidelines</a> for detailed requirements. View published research articles from <a href="#">PLOS ONE</a> for specific examples.</p> <p>This statement is required for submission and <b>will appear in the published article</b> if the submission is accepted. Please make</p> | <p>This research was financially supported by the Natural Science Foundation of China (NSFC)(Grant No. 31100489), which was received by He Li.<br/> <a href="https://isisn.nsf.gov.cn/egrantweb/">https://isisn.nsf.gov.cn/egrantweb/</a></p>                                                                                                                                                                                                                                                                                                                                                                                                                                                                                                                                                                                                                                                                                                                                                                                                                                                                                                                                                                                                                                                                                                                                                                                                                                                                                                                                                                                                                                                                                                                                                                                                                                                                                                                                                                                                                                                                                                                                                                                                                                                                                                                                                                                                                                                                                                                                                                                                            |

sure it is accurate.

#### Unfunded studies

Enter: *The author(s) received no specific funding for this work.*

#### Funded studies

Enter a statement with the following details:

- Initials of the authors who received each award
- Grant numbers awarded to each author
- The full name of each funder
- URL of each funder website
- Did the sponsors or funders play any role in the study design, data collection and analysis, decision to publish, or preparation of the manuscript?
- **NO** - Include this sentence at the end of your statement: *The funders had no role in study design, data collection and analysis, decision to publish, or preparation of the manuscript.*
- **YES** - Specify the role(s) played.

\* typeset

#### Competing Interests

Use the instructions below to enter a competing interest statement for this submission. On behalf of all authors, disclose any [competing interests](#) that could be perceived to bias this work—acknowledging all financial support and any other relevant financial or non-financial competing interests.

This statement **will appear in the published article** if the submission is accepted. Please make sure it is accurate. View published research articles from [PLOS ONE](#) for specific examples.

The authors have declared that no competing interests exist.

**NO authors have competing interests**

Enter: *The authors have declared that no competing interests exist.*

**Authors with competing interests**

Enter competing interest details beginning with this statement:

*I have read the journal's policy and the authors of this manuscript have the following competing interests: [insert competing interests here]*

\* typeset

**Ethics Statement**

N/A

Enter an ethics statement for this submission. This statement is required if the study involved:

- Human participants
- Human specimens or tissue
- Vertebrate animals or cephalopods
- Vertebrate embryos or tissues
- Field research

Write "N/A" if the submission does not require an ethics statement.

General guidance is provided below. Consult the [submission guidelines](#) for detailed instructions. **Make sure that all information entered here is included in the Methods section of the manuscript.**

**Format for specific study types**

**Human Subject Research (involving human participants and/or tissue)**

- Give the name of the institutional review board or ethics committee that approved the study
- Include the approval number and/or a statement indicating approval of this research
- Indicate the form of consent obtained (written/oral) or the reason that consent was not obtained (e.g. the data were analyzed anonymously)

**Animal Research (involving vertebrate animals, embryos or tissues)**

- Provide the name of the Institutional Animal Care and Use Committee (IACUC) or other relevant ethics board that reviewed the study protocol, and indicate whether they approved this research or granted a formal waiver of ethical approval
- Include an approval number if one was obtained
- If the study involved *non-human primates*, add *additional details* about animal welfare and steps taken to ameliorate suffering
- If anesthesia, euthanasia, or any kind of animal sacrifice is part of the study, include briefly which substances and/or methods were applied

**Field Research**

Include the following details if this study involves the collection of plant, animal, or other materials from a natural setting:

- Field permit number
- Name of the institution or relevant body that granted permission

**Data Availability**

Authors are required to make all data underlying the findings described fully available, without restriction, and from the time of publication. PLOS allows rare exceptions to address legal and ethical concerns. See the [PLOS Data Policy](#) and [FAQ](#) for detailed information.

Yes - all data are fully available without restriction

A Data Availability Statement describing where the data can be found is required at submission. Your answers to this question constitute the Data Availability Statement and **will be published in the article**, if accepted.

**Important:** Stating 'data available on request from the author' is not sufficient. If your data are only available upon request, select 'No' for the first question and explain your exceptional situation in the text box.

Do the authors confirm that all data underlying the findings described in their manuscript are fully available without restriction?

**Describe where the data may be found in full sentences. If you are copying our sample text, replace any instances of XXX with the appropriate details.**

- If the data are **held or will be held in a public repository**, include URLs, accession numbers or DOIs. If this information will only be available after acceptance, indicate this by ticking the box below. For example: *All XXX files are available from the XXX database (accession number(s) XXX, XXX).*
- If the data are all contained **within the manuscript and/or Supporting Information files**, enter the following:  
*All relevant data are within the manuscript and its Supporting Information files.*
- If neither of these applies but you are able to provide **details of access elsewhere**, with or without limitations, please do so. For example:

*Data cannot be shared publicly because of [XXX]. Data are available from the XXX Institutional Data Access / Ethics Committee (contact via XXX) for researchers who meet the criteria for access to confidential data.*

*The data underlying the results presented in the study are available from (include the name of the third party*

All relevant data are within the manuscript and its Supporting Information files.



|                                                                                                                                                                                                                                         |  |
|-----------------------------------------------------------------------------------------------------------------------------------------------------------------------------------------------------------------------------------------|--|
| <p><i>and contact information or URL).</i></p> <ul style="list-style-type: none"><li>• This text is appropriate if the data are owned by a third party and authors do not have permission to share the data.</li></ul> <p>* typeset</p> |  |
| Additional data availability information:                                                                                                                                                                                               |  |

1 Diversity in sea buckthorn (*Hippophae rhamnoides*  
2 L.) accessions with different origins based on  
3 morphological characteristics, oil traits, and  
4 microsatellite markers

5

6

7 He Li<sup>1,2</sup>, Chengjiang Ruan<sup>2\*</sup>, Jian Ding<sup>2</sup>, Jingbin Li<sup>2</sup>, Li Wang<sup>2</sup>, Xingjun Tian<sup>1,3\*</sup>

8 <sup>1</sup> School of Life Science, Nanjing University, Nanjing, P.R. China

9 <sup>2</sup> Key Laboratory of Biotechnology and Bioresources Utilization, Dalian Minzu  
10 University, Dalian, P.R. China

11 <sup>3</sup> Co-Innovation Center for Sustainable Forestry in Southern China, Nanjing Forestry  
12 University, Nanjing, P.R. China

13

14

15 \* Corresponding authors

16 E-mail: ruan@dlnu.edu.cn (CR); tianxj@nju.edu.cn (XT)

17

18

19

20

21

22

## 23 **Abstract**

24 Sea buckthorn (*Hippophae rhamnoides*) is an ecologically and economically important  
25 species. Here, we assessed the diversity of 78 accessions cultivated in northern China  
26 using 8 agronomic characteristics, oil traits (including oil content and fatty acid  
27 composition) in seeds and fruit pulp, and SSR markers at 23 loci. The 78 accessions  
28 included 52 from ssp. *mongolica*, 6 from ssp. *sinensis*, and 20 hybrids. To assess the  
29 phenotypic diversity of these accessions, 8 agronomic fruit traits were recorded and  
30 analyzed using principal component analysis (PCA). The first two PCs accounted for  
31 approximately 78% of the variation among accessions. The oil contents were higher in  
32 pulp (3.46-38.56%) than in seeds (3.88-8.82%), especially in ssp. *mongolica* accessions.  
33 The polyunsaturated fatty acid (PUFA) ratio was slightly lower in the seed oil of hybrids  
34 (76.06%) than that of in ssp. *mongolica* (77.66%) and higher than that of in ssp. *sinensis*  
35 (72.22%). The monounsaturated fatty acid (MUFA) ratio in the pulp oil of ssp. *sinensis*  
36 (57.00%) was highest, and that in ssp. *mongolica* (51.00%) was ~~approximately~~ equal to  
37 the ratio in the hybrids (51.20%). Using canonical correspondence analysis (CCA), we  
38 examined the correlation between agronomic traits and oil characteristics in pulp and  
39 seeds. Oil traits in pulp from different origins were correlated with morphological  
40 groupings ( $r = 0.8725$ ,  $p = 0.0000$ ). To assess the genotypic diversity, 23 SSR markers  
41 (including 17 loci previously reported) were used among the 78 accessions with 59  
42 polymorphic amplified fragments obtained and an average PIC value of 0.2845. All  
43 accessions were classified into two groups based on the UPGMA method. The  
44 accessions of ssp. *sinensis* and ssp. *mongolica* were genetically distant. The hybrid

45 accessions were close to *ssp. mongolica* accessions. The 8 agronomic traits, oil  
46 characteristics in seed and pulp oils, and 23 SSR markers successfully distinguished the  
47 78 accessions. These results will be valuable for cultivar identification and genetic  
48 diversity analysis in cultivated sea buckthorn.

49

## 50 **Introduction**

51 Sea buckthorn (*Hippophae rhamnoides* L.) is a hardy winter shrub that is naturally  
52 distributed throughout Asia and Europe. It is an economically valuable species, divided  
53 into eight subspecies. Of these subspecies, *ssp. sinensis* and *mongolica* are mainly  
54 distributed in Asia, where they are abundant and commercially cultivated [1–2]. The  
55 fruits of sea buckthorn are rich in a variety of phytochemicals with physiological  
56 properties, such as lipids, carotenoids, ascorbic acid, tocopherols, and flavonoids [3–5].  
57 The main applications for the fruits include food, cosmetics, and pharmaceutical  
58 products [6–7]. One of the most requested products for therapeutic practices is sea  
59 buckthorn oil, which is extracted from both seeds and fruit pulp. The applications of  
60 sea buckthorn oil include healing of the skin, mucosa, and immune systems, especially  
61 in cancer and cardiovascular disease therapy [8–9].

62 Two important parameters in analyzing oil yield and quality are oil content and fatty  
63 acid (FA) composition (referred to here as ‘oil traits’ for simplicity). Sea buckthorn seed  
64 and pulp oils are considered the most valuable products of the berries with a unique FA  
65 composition [10]. The seed oil contains omega-3 ( $\alpha$ -linolenic acid) and omega-6  
66 (linoleic acid) FAs, and the pulp oil is characterized by a high concentration of FAs

67 from the omega-7 group (e.g., palmitoleic acid). Seed oil is rich in unsaturated FAs  
68 (commonly 30-40% linoleic acid and 20-35% linolenic acid) [10]. The soft parts (pulp  
69 and peel) of the berries have an FA composition that differs from the seeds that is  
70 characterized by a high level of palmitoleic acid (16–54%), which is very uncommon  
71 in plants. The oil traits of sea buckthorn berries vary greatly according to their origin,  
72 based on the climatic and geological conditions of the growing areas [11].

73 Sea buckthorn adapts well to extreme conditions, including drought, salinity,  
74 alkalinity, and extreme temperatures [12]. Its vigorous vegetative reproduction and  
75 strong, complex root system with nitrogen-fixing nodules make it an optimal pioneer  
76 plant for soil and water conservation. For these reasons, sea buckthorn is cultivated  
77 widely in arid and semiarid areas of China [13]. ~~Due to the small berries and thorns of~~  
78 ~~native cultivars (ssp. *sinensis*), which result in little economic value,~~ the breeding of  
79 sea buckthorn has undergone different stages of development in China, such as  
80 introduction, domestication, seedling selection and artificial hybridization for elite  
81 accessions. The cultivars of ssp. *mongolica* (introduced from Russia and Mongolia),  
82 ssp. *sinensis* (China origin) and hybrids (ssp. *mongolica* × ssp. *sinensis*) are abundant  
83 in northern China [14]. However, as a perennial woody plant, traditional cross breeding  
84 that takes a long time and has low efficiency cannot meet the needs of modern  
85 production in sea buckthorn. It is essential for economic production to utilize molecular  
86 marker-assisted breeding (MAB) in sea buckthorn, especially to breed accessions  
87 associated with desirable oil traits. An essential step in this process is the genetic  
88 analysis of sea buckthorn germplasm. At present, molecular markers are mainly used

89 for the analysis of genetic diversity, the taxonomic and geographic origin of cultivars,  
90 sex determination and population genetic structure in sea buckthorn [14–16]. SSR  
91 (simple sequence repeat, microsatellite) markers, with 1- to 6-bp DNA regions repeated  
92 in tandem, have been used in these analyses for their advantages of codominance,  
93 random distribution throughout the genome, easy detection, and high polymorphism  
94 and reproducibility [17]. Currently, an increasing number of microsatellite markers are  
95 being developed in sea buckthorn using high-throughput sequencing techniques for  
96 transcriptome datasets (RNA-Seq), which have become valuable resources for SSR  
97 discovery [14, 18]. In our previous study, 17 RNA-Seq SSR markers (SB1-SB17) were  
98 developed and validated on 31 accessions, which were utilized in the present study for  
99 genetic diversity assessment of larger set of accessions [14].

100 Diversity analysis helps clarify the relationships between germplasm  
101 characteristics and genotype and will improve our understanding of sea buckthorn  
102 germplasm to achieve greater production with higher quality regarding the important  
103 traits correlated with germplasm [19].

104 In the present study, 78 accessions of sea buckthorn with variation in fruit traits  
105 were selected as materials. The aim of this study is to report the phenotypic  
106 characteristics and oil traits in fruit pulp and seeds and the genetic diversity of the 78  
107 sea buckthorn accessions in northern China, providing a foundation for MAB in sea  
108 buckthorn.

109

## 110 **Materials and methods**

111 **Plant materials**

112 Berries and leaves of 78 sea buckthorn accessions belonging to *ssp. mongolica* (52  
 113 accessions), *ssp. sinensis* (6 accessions) and hybrids (*ssp. mongolica* × *ssp. sinensis*, 20  
 114 accessions) were collected from the end of July to mid-September in 2015. [Table 1](#)  
 115 summarizes information on the plant materials. Three research institutes located in  
 116 northern China, the Institute of Selection and Breeding of *Hippophae* (42°26'N,  
 117 121°28'E; 380 m) in Fuxin, the Research Institute of Berry (47°14'N, 127°06'E; 202 m)  
 118 in Suiling and the Jiuchenggong Breeding Base of Sea Buckthorn (39°40'N, 110°09'E;  
 119 1400 m) in Dongsheng, provided 76 accessions of sea buckthorn samples ([Fig 1](#), [S1](#)  
 120 [Table](#)). The other two accessions, Quysisike and Zhongguoshaji<sup>wild</sup>, were harvested from  
 121 cultivated fields in Qinghe (46°40'N, 90°22'E; 1218 m) and Datong (36°53'N, 101°35'E;  
 122 2800 m) ([Fig 1](#), [S1 Table](#), [S2 Table](#)). These areas have various geographical and  
 123 climatic conditions ([S3 Table](#)).

124 The young leaves of each plant were kept at −80 °C for use. The berries of each  
 125 accession were pooled and frozen as quickly as possible at −20 °C. When all plant  
 126 materials were harvested, the berries were transferred to −50 °C for storage until  
 127 analysis.

128

129 **Fig 1. The 78 sea buckthorn accessions from five cultivated lands used in this study.**

130

131 **Table 1. Accessions of sea buckthorn used for the study.**

| No. | Accession name | Abbrev. <sup>a</sup> | Collection site | ssp. <sup>b</sup> | No. | Accession name | Abbrev. <sup>a</sup> | Collection site | ssp. <sup>b</sup> |
|-----|----------------|----------------------|-----------------|-------------------|-----|----------------|----------------------|-----------------|-------------------|
|-----|----------------|----------------------|-----------------|-------------------|-----|----------------|----------------------|-----------------|-------------------|

|    |                  |        |         |   |    |                 |         |           |   |
|----|------------------|--------|---------|---|----|-----------------|---------|-----------|---|
| 1  | Zhuangyuanhuang  | ZYH    | Fuxin   | M | 40 | E13-10          | E13-10  | Suiling   | M |
| 2  | Wucifeng         | WCF    | Fuxin   | M | 41 | E13-11          | E13-11  | Suiling   | M |
| 3  | Liusha-1         | LS1    | Fuxin   | M | 42 | E13-14          | E13-14  | Suiling   | M |
| 4  | Siberia rumianes | SR     | Fuxin   | M | 43 | HS-1            | HS1     | Suiling   | M |
| 5  | Fangxiang        | FX     | Fuxin   | M | 44 | HS-4            | HS4     | Suiling   | M |
| 6  | Yalishanda-12    | YLS12  | Fuxin   | M | 45 | HS-9            | HS9     | Suiling   | M |
| 7  | Jiuyuehuang      | JYH    | Fuxin   | M | 46 | HS-10           | HS10    | Suiling   | M |
| 8  | Nanren           | NR     | Fuxin   | M | 47 | HS-12           | HS12    | Suiling   | M |
| 9  | Botanical garden | BG     | Fuxin   | M | 48 | HS-14           | HS14    | Suiling   | M |
| 10 | Zajiao-1         | ZJ1    | Fuxin   | H | 49 | HS-18           | HS18    | Suiling   | M |
| 11 | Zajiao-2         | ZJ2    | Fuxin   | H | 50 | HS-20           | HS20    | Suiling   | M |
| 12 | Zajiao-3         | ZJ3    | Fuxin   | H | 51 | HS-22           | HS22    | Suiling   | M |
| 13 | MZ-14            | MZ14   | Suiling | M | 52 | Xin'e-1         | XE1     | Suiling   | M |
| 14 | Shoudu           | SD     | Suiling | M | 53 | Xin'e-2         | XE2     | Suiling   | M |
| 15 | Fenlan           | FL     | Suiling | M | 54 | Xin'e-3         | XE3     | Suiling   | M |
| 16 | Aertai           | AET    | Suiling | M | 55 | Zhongguoshaji   | ZGSJ    | Suiling   | S |
| 17 | Chengse          | CS     | Suiling | M | 56 | EZ-4            | EZ4     | Suiling   | H |
| 18 | Chuyi            | CY     | Suiling | M | 57 | Za-56           | Za56    | Suiling   | H |
| 19 | Hunjin           | HJ     | Suiling | M | 58 | Za1-2           | Za1-2   | Suiling   | H |
| 20 | Jinse            | JS     | Suiling | M | 59 | Za05-6          | Za05-6  | Suiling   | H |
| 21 | Juren            | JR     | Suiling | M | 60 | Za05-20         | Za05-20 | Suiling   | H |
| 22 | Xiangyang        | XY     | Suiling | M | 61 | Za05-21         | Za05-21 | Suiling   | H |
| 23 | Yousheng         | YS     | Suiling | M | 62 | Za4             | Za4     | Suiling   | H |
| 24 | Katuni           | KTN    | Suiling | M | 63 | Za13-19         | Za13-19 | Suiling   | H |
| 25 | Wulangemu        | WLGEM  | Suiling | M | 64 | Za13-25         | Za13-25 | Suiling   | H |
| 26 | TF1              | TF1    | Suiling | M | 65 | Juda            | JD      | Dongsheng | S |
| 27 | TF2-13           | TF2-13 | Suiling | M | 66 | Jianpingdahuang | JPDH    | Dongsheng | S |
| 28 | TF2-23           | TF2-23 | Suiling | M | 67 | Manhanci        | MHC     | Dongsheng | S |
| 29 | TF2-24           | TF2-24 | Suiling | M | 68 | Zhongxiongyou   | ZXY     | Dongsheng | S |
| 30 | TF2-36           | TF2-36 | Suiling | M | 69 | Liaofuza        | LFZ     | Dongsheng | H |



|    |         |        |         |   |    |                               |                      |           |   |
|----|---------|--------|---------|---|----|-------------------------------|----------------------|-----------|---|
| 31 | Suiji-1 | SJ1    | Suiling | M | 70 | Zaciyou-1                     | ZCY1                 | Dongsheng | H |
| 32 | Suiji-3 | SJ3    | Suiling | M | 71 | Zaciyou-10                    | ZCY10                | Dongsheng | H |
| 33 | Suiji-4 | SJ4    | Suiling | M | 72 | Zaciyou-12                    | ZCY12                | Dongsheng | H |
| 34 | HD-3    | HD3    | Suiling | M | 73 | Xinzaci-26                    | XZC26                | Dongsheng | H |
| 35 | E10-06  | E10-06 | Suiling | M | 74 | Shiciyou-2                    | SCY2                 | Dongsheng | H |
| 36 | E10-34  | E10-34 | Suiling | M | 75 | Shiciyou-5                    | SCY5                 | Dongsheng | H |
| 37 | E10-42  | E10-42 | Suiling | M | 76 | Shiciyou-30                   | SCY30                | Dongsheng | H |
| 38 | E10-47  | E10-47 | Suiling | M | 77 | Zhongguoshaji <sup>wild</sup> | ZGSJ <sup>wild</sup> | Datong    | S |
| 39 | E13-00  | E13-00 | Suiling | M | 78 | Qiuyisike                     | QYSK                 | Qinghe    | M |

132

133 <sup>a</sup> Abbrev., abbreviation.

134 <sup>b</sup> ssp., subspecies; M, ssp. *mongolica*; S, ssp. *sinensis*; H, hybrid (ssp. *mongolica* ♀ × ssp. *sinensis* ♂).

135

## 136 **Morphological characteristics of fruit**

137 Hundred berry weight (HBW) was the weight of 100 fresh berries after they were  
138 picked from bushes. Hundred seed weight (HSW) was the weight of 100 seeds after air  
139 drying at room temperature (25 °C) for 2 weeks [20]. There were three biological  
140 replicates for each measurement. The transverse and longitudinal diameters of berries  
141 (BTD and BLD) and the length, width and thickness of seeds (SL, SW and ST) were  
142 measured over 20 times each (on average) by micrometer calipers. The berry shape  
143 indices (BSIs) were estimated by the ratio of BLD to BTD. The minimum (Min),  
144 maximum (Max), mean ± standard deviation (SD), and coefficient of variation (CV%)  
145 were reported.

146

## 147 **Oil extraction and FA analysis in seeds and pulp**

148 The methods of lipid extraction, transesterification (methylation) and purification of  
149 methyl esters of the lipid extracts were described by Yang and Kallio [11]. Briefly,  
150 samples (1 g) of seeds and fruit pulp were isolated from freeze-dried berries and lipids  
151 from the samples were extracted with chloroform/methanol (2:1, v/v) with mechanical  
152 homogenization of the tissues. The purified oils were filtered before the solvent was  
153 removed on a rotary evaporator. The lipids were weighed, and the oil contents  
154 (percentages) in seeds and fruit pulp were calculated. Three biological replicates were  
155 taken for analysis. Lipids were stored in chloroform at  $-20\text{ }^{\circ}\text{C}$  until analysis.

156 The oil (10 mg) was transesterified by sodium methoxide catalysis [11, 21]. It was  
157 dissolved in sodium-dried diethyl ether (1 ml) and methyl acetate (20  $\mu\text{l}$ ). Then, 1 M  
158 sodium methoxide in dry methanol (20  $\mu\text{l}$ ) was added, and the solution was agitated  
159 briefly and incubated for 5 min at room temperature. The reaction was stopped by  
160 adding a saturated solution of oxalic acid in diethyl ether (30  $\mu\text{l}$ ) with brief agitation.  
161 The mixture was centrifuged at 1500 g for 2 min, and the supernatant was dried in a  
162 gentle stream of nitrogen. Fresh hexane (1 ml) was added and the solution was filtered  
163 with microporous filtering films (0.22  $\mu\text{m}$ ) for analysis.

164 Fatty acid methyl esters (FAMES) were analyzed with a gas chromatography-  
165 tandem mass spectrometry (GC/MS/MS) system (model AxION<sup>®</sup> iQT<sup>™</sup>, PerkinElmer,  
166 Shelton, CT, USA). Chromatographic separation was achieved using a DB-23 capillary  
167 column (60 m  $\times$  0.25 mm  $\times$  0.25  $\mu\text{m}$ ; Agilent Technologies, Santa Clara, CA, USA)  
168 with the following temperature program: initial temperature  $50\text{ }^{\circ}\text{C}$ , hold for 1 min, heat  
169 to  $175\text{ }^{\circ}\text{C}$  at  $25\text{ }^{\circ}\text{C}/\text{min}$ , then heat to  $215\text{ }^{\circ}\text{C}$  at  $3\text{ }^{\circ}\text{C}/\text{min}$  and hold for 10 min, heat to

170 230 °C at 3 °C/min and hold for 5 min. The inlet was operated in split mode (1:20) at a  
171 temperature of 250 °C with helium as the carrier gas at constant flow of 1.0 mL/min.  
172 The transfer line temperature was 215 °C, and the MS ion source was set to 230 °C.  
173 MS detection was carried out in electron impact (EI) ionization mode, scanning all  
174 masses from 45–400 amu. FAME components were identified based on mass spectral  
175 comparison with an external standard (Supelco 37 Component FAME Mix, Sigma-  
176 Aldrich, St. Louis, MO, USA) and previous studies [10–11]. The main FA composition  
177 was expressed as a weight percentage of the total FAs from three replicates. The  
178 minimum, maximum, mean  $\pm$  SD, and CV% were reported.

179

## 180 **Statistical analysis**

181 The data analysis for morphological traits and oil characteristics was performed with  
182 SPSS<sup>®</sup> 24.0 (IBM<sup>®</sup>). The following parameters were evaluated: mean, minimum value,  
183 maximum value, SD and CV%. One-way analysis of variance (ANOVA) was used in  
184 the comparison of all traits among subsp. of *sinensis*, subsp. of *mongolica* and hybrids.  
185 Pearson correlation coefficients were calculated to analyze the relationship between  
186 pairs of 8 agronomic traits. Principal component analysis (PCA) was used to determine  
187 relationships among the accessions. In addition, a canonical correspondence analysis  
188 (CCA) was applied to the data between morphological characteristics and oil traits in  
189 different tissues (seeds and pulp).

190

## 191 **DNA extraction and SSR analysis**

192 Total genomic DNA was extracted from young leaves using the TaKaRa MiniBEST  
193 Plant Genomic DNA Extraction Kit (TaKaRa, Beijing, China) based on the  
194 manufacturer's protocol. The purity and quantity of extracted DNA were evaluated by  
195 gel electrophoresis and a NanoDrop 2000 Spectrophotometer (Thermo Fisher Scientific,  
196 Waltham, MA, USA). Twenty-three polymorphic microsatellite loci (SB1-SB23)  
197 developed using RNA-Seq were evaluated. Of these, 17 (SB1-SB17) had been  
198 deployed in a previous study by the group [14] (S4 Table). PCR amplification was  
199 performed in 20 µl volumes containing 40 ng of DNA template, 1× PCR buffer, 1.5 mM  
200 MgCl<sub>2</sub>, 0.15 mM of each dNTP (Takara, Dalian, China), 1.5 U of Taq polymerase  
201 (Takara, Dalian, China) and 0.5 µM of each primer. The PCR conditions included an  
202 initial denaturation at 94 °C for 2 min and 35 cycles of 30 s at 94 °C for denaturation,  
203 30 s at 54–60 °C for annealing and 45 s at 72 °C for extension, with a final extension  
204 for 7 min at 72 °C using a C1000 Touch™ Thermal Cycler (Bio-Rad, Berkeley, CA,  
205 USA). PCR products were electrophoresed on 8% nondenaturing polyacrylamide gels  
206 using an SE 600 Ruby Standard Dual Cooled Vertical Unit (GE Healthcare Life  
207 Sciences, Pittsburgh, PA, USA) and visualized by silver staining.

208 The microsatellites were scored as codominant markers for genetic diversity  
209 analysis. The number of alleles (Na), effective number of alleles (Ne), observed and  
210 expected heterozygosity (Ho and He), Shannon's information index (Is) and  
211 polymorphic information content (PIC) for each of the genic SSR markers were  
212 calculated using GenAlEx 6.5 [22–23] and PowerMarker version 3.25 [24] software  
213 packages. A genetic similarity matrix based on the proportion of shared alleles was

214 generated, and a UPGMA tree was constructed using PowerMarker. The dendrogram  
215 was displayed using MEGA 6 software [25] to reveal genetic relationships between the  
216 78 sea buckthorn accessions.

217

## 218 **Results**

### 219 **Morphological characterization of berries and seeds**

220 Descriptive statistical analysis of 8 agronomic fruit traits for the 78 sea buckthorn  
221 accessions is shown in Tables 2, S5 and S6. Relatively high CV values were observed  
222 for the HBW, BLD, and HSW (> 20%). The highest CV% was observed for the HBW  
223 (39.12%), which varied from 8.52 to 69.74 g. ANOVA ( $p < 0.05$ ) showed that the HBW  
224 of *ssp. mongolica* berries was  $47.69 \pm 11.03$  g, which was much higher than those of  
225 *ssp. sinensis* berries ( $10.73 \pm 1.54$  g) and hybrids ( $31.44 \pm 13.84$  g). In hybrids, the  
226 HBW values were high in EZ4, Za56, Za1-2, Za05-6 and Za05-21(> 45 g), which were  
227 approximately the size of those in *ssp. mongolica* berries on average (S6 Table). The  
228 BTD varied from 5.54 to 10.80 mm, and the BLD varied from 4.83 to 14.25 mm. In  
229 addition, the BLD of berries from *ssp. mongolica* was higher than the BTD, and this  
230 relationship was the opposite in berries of *ssp. sinensis*. According to BSI values, the  
231 berry shapes of the three groups were significantly different ( $p = 0.000$ ): oblong berries  
232 for *ssp. mongolica* ( $1.35 \pm 0.20$ ), oblate berries for *ssp. sinensis* ( $0.90 \pm 0.05$ ) and  
233 circular berries for the hybrids ( $1.08 \pm 0.11$ ). The HSW varied from 0.61 to 2.19 g with  
234 an average of 1.45 g. Similar to the HBW, there were significant differences in the  
235 HSW among seeds from *ssp. mongolica*, *ssp. sinensis*, and hybrids ( $p = 0.000$ ). The SL

236 varied from 2.00 to 3.49 mm, and the SW varied from 2.98 to 7.43 mm. The ST varied  
 237 from 1.54 to 2.73 mm, with an average of 1.93 mm. Overall, the agronomic  
 238 characteristics of seeds (HSW, SL, SW, and ST) showed relatively low coefficients of  
 239 variation, ranging from 11.50–24.33%; however, the berries (HBW, BTD, BLD, and  
 240 BSI) had high CV%s.

241

242 **Table 2. Fruit traits of sea buckthorn berries of two different subspecies and hybrid accessions<sup>a</sup>.**

243

| Trait name                       | Abbrev. <sup>b</sup> | <i>ssp. mongolica</i> | <i>ssp. sinensis</i> | Hybrid         |
|----------------------------------|----------------------|-----------------------|----------------------|----------------|
| Hundred berry weight (g)         | HBW (g)              | 47.69 ± 11.03a        | 10.73 ± 1.54c        | 31.44 ± 13.84b |
| Berry transverse diameter (mm)   | BTD (mm)             | 8.17 ± 0.99a          | 5.84 ± 0.23b         | 7.61 ± 1.24a   |
| Berry longitudinal diameter (mm) | BLD (mm)             | 10.90 ± 1.48a         | 5.20 ± 0.19c         | 8.15 ± 1.18b   |
| Berry shape index                | BSI                  | 1.35 ± 0.20           | 0.90 ± 0.05          | 1.08 ± 0.11    |
| Hundred seed weight (g)          | HSW (g)              | 1.60 ± 0.28a          | 0.79 ± 0.23c         | 1.28 ± 0.25b   |
| Seed length (mm)                 | SL (mm)              | 5.91 ± 0.68a          | 3.31 ± 0.27c         | 4.64 ± 0.56b   |
| Seed width (mm)                  | SW (mm)              | 2.76 ± 0.27a          | 2.18 ± 0.18c         | 2.52 ± 0.22b   |
| Seed thickness (mm)              | ST (mm)              | 1.98 ± 0.18a          | 1.67 ± 0.16 b        | 1.86 ± 0.26a   |

244 <sup>a</sup> Values with different lowercase letters (a–c) are significantly different at  $p < 0.05$ .

245 <sup>b</sup> Abbrev., Abbreviation.

246

247 In previous multilocation trials in Suiling (47°14'N, 127°06'E; 202 m) and  
248 Dengkou (40°43'N, 106°30'E; 1053 m, Inner Mongolia), the fruit characteristics of  
249 11 large berry accessions (AET, CS, CY, HJ, JS, JR, XY, YS, KTN, WLGM and SJ1)  
250 were comparatively analyzed (S7 Table). The HBWs values in Suiling (38.33–67.59  
251 g) were higher than those in Dengkou (32.87–63.85 g). For all the introduced cultivars,  
252 the HBW values in the two experimental fields were lower than those in their country  
253 of origin, Russia. The phenotypic characteristics of sea buckthorn berries showed  
254 differences due to their origins, different parts of fruit analyzed, climatic and growing  
255 conditions. In this study, 78 accessions were selected for their good adaptabilities to  
256 growth sites.

257 PCA was performed using fruit characteristics (Fig 2). The first two PCs explained  
258 78.11% of the total morphological variance. The first PC accounted for 41.74% of the  
259 variance. It was associated with BTD, HBW, ST, HSW, and SW in descending order.  
260 Therefore, these traits were important attributes for the classification of sea buckthorn  
261 accessions. The second PC accounted for 36.37%, which were correlated with BSI, SL,  
262 and BLD in descending order. The plot shows the distribution of 78 sea buckthorn  
263 accessions on PC1 and PC2 (Fig 2). The ssp. *mongolica* accessions with larger berries  
264 tended to cluster together, mainly positive on PC2. Six accessions of ssp. *sinensis* with  
265 the smallest berries were negative on both PC1 and PC2. The hybrids were largely  
266 distributed between the above two groups. Some hybrids (including ZCY1, ZCY10,  
267 ZCY12, XZC26, SCY2, and SCY5) were close to the accessions from ssp. *sinensis*.

268

269 Fig 2. Two-dimensional scatter plot for the first two principal components (PC1 and PC2) based  
 270 on the agronomic fruit characteristics of 78 sea buckthorn accessions. Numbers associated with  
 271 symbols are the variety codes listed in Table 1. ▲ = *ssp. mongolica*; ● = *ssp. sinensis*; ◇ = hybrid.

272

## 273 Oil characterization in seeds and seedless parts

274 The oil characteristics of seeds and seedless parts (pulp and peel) among the 78  
 275 accessions are summarized in Tables 3 and Table 4. One special feature of sea  
 276 buckthorn fruit was the high oil content in the pulp and peel (20.41%), in contrast to  
 277 the oil content in the seeds (8.82%). A higher CV% was observed in pulp oil (42.72%)  
 278 and varied over a wide range, from 3.46 to 38.56%. The pulp fraction of berries of *ssp.*  
 279 *mongolica* had the highest oil content (24.68%) based on dry weight. The lowest pulp  
 280 oil content (7.10%) on average was found in the berries of *ssp. sinensis*. In hybrids, the  
 281 berries of ZJ2 contained 27.22% pulp oil, which slightly exceeded that of *ssp.*  
 282 *mongolica* on average (S6 Table). The seed oil content varied from 3.88 to 12.75% with  
 283 an average of 8.82%. The seeds of *ssp. mongolica* had the highest oil contents, with an  
 284 average of 9.46%, and those of the other two groups did not differ significantly.

285

286 Table 3. Oil characteristics of pulp and seeds of 78 sea buckthorn accessions (weight  
 287 percentages).

| Character   | Pulp             |                  |                        |                     | Seed             |                  |                        |                     |
|-------------|------------------|------------------|------------------------|---------------------|------------------|------------------|------------------------|---------------------|
|             | Min <sup>a</sup> | Max <sup>b</sup> | Mean ± SD <sup>c</sup> | CV <sup>d</sup> (%) | Min <sup>a</sup> | Max <sup>b</sup> | Mean ± SD <sup>c</sup> | CV <sup>d</sup> (%) |
| oil content | 3.46             | 38.56            | 20.41 ± 8.72           | 42.72               | 3.88             | 12.75            | 8.82 ± 1.86            | 21.08               |



|                                   |       |       |              |        |                 |                 |                 |       |
|-----------------------------------|-------|-------|--------------|--------|-----------------|-----------------|-----------------|-------|
| Palmitic acid (16:0)              | 24.52 | 53.08 | 36.26 ± 4.83 | 13.32  | 3.84            | 11.77           | 6.55 ± 1.39     | 21.16 |
| Palmitoleic acid (16:1n7)         | 17.93 | 57.75 | 35.12 ± 7.64 | 21.76  | tr <sup>e</sup> | tr <sup>e</sup> | tr <sup>e</sup> |       |
| Stearic acid (18:0)               | 0.38  | 5.12  | 1.26 ± 0.70  | 55.58  | 1.41            | 4.58            | 2.16 ± 0.43     | 20.11 |
| Oleic acid (18:1n9)               | 1.44  | 23.43 | 8.72 ± 4.72  | 54.13  | 3.05            | 25.95           | 13.25 ± 4.04    | 30.50 |
| Vaccenic acid (18:1n7)            | 3.51  | 24.24 | 7.68 ± 4.09  | 53.28  | 0.45            | 2.38            | 1.20 ± 0.47     | 39.17 |
| Linoleic acid (18:2n6)            | 3.02  | 17.40 | 9.97 ± 3.18  | 31.91  | 34.22           | 52.75           | 42.17 ± 3.60    | 8.54  |
| $\alpha$ -Linolenic acid (18:3n3) | 0.12  | 7.16  | 1.00 ± 1.03  | 102.83 | 21.37           | 47.16           | 34.67 ± 4.42    | 12.75 |

288 <sup>a</sup> Minimum value.

289 <sup>b</sup> Maximum value.

290 <sup>c</sup> Standard deviation.

291 <sup>d</sup> Coefficient of variation expressed as a percentage.

292 <sup>e</sup> tr, trace (< 0.5%).

293 **Table 4. Oil content and fatty acid composition in the seeds and fruit pulp of sea buckthorn berries of different origins<sup>a</sup> (weight percentages).**

| Character                         | Pulp oil              |                      |               | Seed oil              |                      |                 |
|-----------------------------------|-----------------------|----------------------|---------------|-----------------------|----------------------|-----------------|
|                                   | <i>ssp. mongolica</i> | <i>ssp. sinensis</i> | Hybrid        | <i>ssp. mongolica</i> | <i>ssp. sinensis</i> | Hybrid          |
| oil content                       | 24.68 ± 6.79 a        | 7.10 ± 3.28c         | 13.34 ± 4.85b | 9.46 ± 1.56a          | 6.70 ± 1.32b         | 7.78 ± 1.84b    |
| Palmitic acid (16:0)              | 37.68 ± 4.64a         | 29.39 ± 3.71b        | 34.62 ± 3.14a | 6.52 ± 1.16           | 7.41 ± 1.55          | 6.38 ± 1.82     |
| Palmitoleic acid (16:1n7)         | 37.43 ± 7.09a         | 23.65 ± 4.16b        | 32.55 ± 5.84a | tr <sup>b</sup>       | tr <sup>b</sup>      | tr <sup>b</sup> |
| Stearic acid (18:0)               | 1.08 ± 0.69b          | 1.73 ± 0.64a         | 1.59 ± 0.57ab | 2.13 ± 0.29           | 2.19 ± 0.44          | 2.23 ± 0.69     |
| Oleic acid (18:1n9)               | 7.56 ± 3.97b          | 16.67 ± 6.84a        | 9.33 ± 3.40b  | 12.62 ± 3.75b         | 16.37 ± 3.77a        | 13.96 ± 4.46ab  |
| Vaccenic acid (18:1n7)            | 6.01 ± 1.79c          | 16.68 ± 6.20a        | 9.32 ± 3.63b  | 1.07 ± 0.37b          | 1.80 ± 0.39a         | 1.37 ± 0.55b    |
| Linoleic acid (18:2n6)            | 9.55 ± 2.76ab         | 8.34 ± 5.54b         | 11.53 ± 2.92a | 42.10 ± 3.08          | 40.44 ± 4.06         | 42.87 ± 4.62    |
| $\alpha$ -Linolenic acid (18:3n3) | 0.69 ± 0.41b          | 3.54 ± 2.09a         | 1.07 ± 0.64b  | 35.56 ± 4.13a         | 31.78 ± 2.91b        | 33.20 ± 4.89 ab |
| MUFA                              | 51.00 ± 5.38b         | 57.00 ± 9.46a        | 51.20 ± 3.52b | 13.69 ± 3.93b         | 18.18 ± 4.09a        | 15.33 ± 4.90ab  |
| PUFA                              | 10.24 ± 2.98          | 11.89 ± 7.54         | 12.60 ± 3.37  | 77.66 ± 4.31a         | 72.22 ± 5.54b        | 76.06 ± 6.23ab  |

294 <sup>a</sup> Values with different lowercase letters (a–c) are significantly different at  $p < 0.05$ .

295 <sup>b</sup> tr, trace (< 0.5%).

296 For sea buckthorn, the FA composition in the seed oil differed significantly from  
297 that in the pulp oil. The proportions of FAs ranked from high to low as linoleic (18:2n6),  
298  $\alpha$ -linolenic (18:3n3), oleic (18:1n9), palmitic (16:0), stearic (18:0) and vaccenic  
299 (18:1n7) acids in the seed oil of most accessions (Table 4). Linoleic acid varied from  
300 34.22 to 52.75% with an average of 42.17%. The proportion of  $\alpha$ -linolenic acid varied  
301 from 21.37 to 47.16% with an average of 34.67%. High CV values were observed in  
302 oleic (30.50%) and vaccenic (39.17%) acids. Furthermore, the level of palmitoleic acid  
303 (16:1n7, < 0.5%) was extremely low in the seed oil. The FA composition of sea  
304 buckthorn seeds was similar among berries of the two different subspecies and hybrid  
305 accessions. Small variations were found in the proportion of linoleic acid in seed oil  
306 (40.44 – 42.87%). Its proportion in hybrids was slightly higher than in *ssp. mongolica*  
307 (42.87% vs 42.10%), and had the highest value of the samples from the two different  
308 subspecies and hybrid accessions.  $\alpha$ -Linolenic acid showed little variation, with a larger  
309 proportion in *ssp. mongolica* than in *ssp. sinensis* (35.56% vs 31.78%). A higher  
310 proportion of palmitic (7.41% vs 6.38%) and oleic (16.37% vs 13.96%) acids and a  
311 lower proportion of stearic acid (2.19% vs 2.23%) were discovered between the  
312 accessions of *ssp. sinensis* and hybrids. The polyunsaturated fatty acids (PUFA) ratio  
313 in hybrids (76.06%) was slightly lower than that in *ssp. mongolica* (77.66%) and higher  
314 than that in *ssp. sinensis* (72.22%). Some hybrids (including ZJ1, Za1-2, Za13-25,  
315 Za05-6, LFZ, and ZCY12) contained a high proportion of PUFAs (> 80%) in seed oil,  
316 which was more than the average level of *ssp. mongolica* accessions (S6 Table).

317 In pulp oil, the dominant FAs were palmitoleic, palmitic, linoleic, oleic, and  
318 vaccenic acids (Table 3). Major differences were observed in the proportion of  
319 palmitoleic (17.93-57.75%), oleic (1.44-23.43%) and vaccenic (3.51-24.24%) acids.  
320 The special feature of pulp oil is high proportions (> 35%) of palmitoleic and palmitic  
321 acids. Compared to *ssp. sinensis*, *ssp. mongolica* contained a higher proportion of  
322 palmitoleic and palmitic acids in the berry pulp ( $p < 0.05$ ) (Table 4). In particular, the  
323 proportions of oleic and vaccenic acids were highest in *ssp. sinensis*, much higher than  
324 those in *ssp. mongolica* and hybrid accessions. The relative levels of  $\alpha$ -linolenic and  
325 stearic acids in pulp of *ssp. sinensis* were higher than *ssp. mongolica* ( $p < 0.05$ ) (Table  
326 4). For hybrids, the proportions of most FAs were between *ssp. mongolica* and *ssp.*  
327 *sinensis* accessions, except for linoleic acid. Similar to the results in seed oils, the  
328 hybrids had the highest proportions of linoleic acid (11.53%) and PUFA (12.60%). The  
329 monounsaturated fatty acid (MUFA) ratio in the pulp oil of *ssp. sinensis* (57.00%) was  
330 highest and that of *ssp. mongolica* (51.00%) was almost equal to that of the hybrids  
331 (51.20%). In the hybrids, the pulp oil of SCY2 contained 39.16% palmitoleic acid, and  
332 the content of MUFAs was 60.77%, which was higher than that in *ssp. sinensis* (S6  
333 Table).

334

## 335 **Correlations among the agronomic traits and oil** 336 **characteristics**

337 Canonical analyses allow direct comparisons of two data matrices. All sea buckthorn

338 accessions were represented in a two-dimensional space using CCA between  
339 phenotypic traits and oil characteristics (Fig 3). For berries of the two different  
340 subspecies and hybrid accessions, phenotypic characters (BLD, HBW, BSI, and BTD)  
341 of berries and oil traits in pulp showed a close correlation ( $r = 0.8725$ ,  $p = 0.0000$ ).  
342 Based on CCA, accessions of *ssp. mongolica* were clustered on the upper side (mainly  
343 positive on D1 and D2), those of *ssp. sinensis* on the other, and the hybrids in the middle  
344 in Fig 3A. The positioning of samples in the first dimension was mostly related to  
345 differences in their berry characteristics that were primarily provided by a marker of  
346 BLD. The second dimension indicated differences in the oil contents and FA  
347 compositions of pulp oil among sea buckthorn accessions. Differences between pulp  
348 oil traits were primarily related to percentages of oil content, 16:0 and 16:1n7, which  
349 were highest in *ssp. mongolica*, followed by hybrids, and lowest in *ssp. sinensis*. For  
350 seeds of 78 accessions, phenotypic characteristics (SL, SW, ST, and HSW) and seed oil  
351 traits were correlated ( $r = 0.7482$ ,  $p = 0.0000$ ). The positioning of samples was  
352 staggered (Fig 3B), which reflected that all seed samples had relatively little variation  
353 among phenotypic traits and oil characteristics. These results verified the previous  
354 analysis (Table 2 and Table 3).

355

356 **Fig 3. Canonical correspondence analysis of phenotypic traits (A. berry; B. seed) and oil**  
357 **characteristics (A. pulp oil; B. seed oil) of sea buckthorn germplasms.** D1, Dimension 1; D2,  
358 Dimension 2. ▲ = *ssp. mongolica*; ● = *ssp. sinensis*; ◇ = hybrid.

359

## SSR diversity

Twenty-three pairs of RNA-Seq SSR primers with good amplification and band stability were used in 78 accessions of sea buckthorn. A total of 69 bands were amplified using the 23 primer pairs, of which 59 were polymorphic, accounting for 85.51% of all bands. The number of amplified bands per locus ranged from 2 to 5, averaging 3, and Ne ranged from 1.0392 to 3.1049, averaging 1.6602 (Table 6). SB2, SB3, SB5, SB6, SB8, SB13, SB16 and SB23 were informative SSR loci, each revealing more than four effective alleles distributed among all of the accessions. Compared with Na, Ne and their average values were lower, which was caused by the uneven distribution of gene frequencies in SSR loci. In the genetic diversity analysis, Ho ranged from 0.0385 to 0.7949, with an average of 0.2965; He ranged from 0.0377 to 0.6779, with an average of 0.3291; and Is ranged from 0.0950 to 1.2152, with an average of 0.5681. The PIC value, regarded as discriminating power, varied from 0.0370 to 0.6174, with an average of 0.2845. Loci SB6 (PIC = 0.6174) and SB8 (PIC = 0.5820) showed higher effectiveness because of their high informativity and could be used to construct the fingerprint map of sea buckthorn germplasm. The characteristics of these 23 loci in the genetic diversity analysis of sea buckthorn germplasm are shown in Table 5.

Table 5. Characterization of 23 polymorphic SSR markers in the 78 sea buckthorn accessions.

| Loci code | Na | Ne     | Ho     | He     | PIC    | Is     |
|-----------|----|--------|--------|--------|--------|--------|
| SB1       | 3  | 1.2745 | 0.2436 | 0.2154 | 0.2025 | 0.3956 |

|      |   |        |        |        |        |        |
|------|---|--------|--------|--------|--------|--------|
| SB2  | 4 | 1.1382 | 0.1282 | 0.1214 | 0.1166 | 0.2791 |
| SB3  | 4 | 2.2372 | 0.4615 | 0.5530 | 0.4627 | 0.9090 |
| SB4  | 2 | 1.5006 | 0.2692 | 0.3336 | 0.2779 | 0.5160 |
| SB5  | 4 | 2.1129 | 0.3333 | 0.5267 | 0.4735 | 0.9288 |
| SB6  | 4 | 3.1049 | 0.7051 | 0.6779 | 0.6174 | 1.2152 |
| SB7  | 2 | 1.0799 | 0.0769 | 0.0740 | 0.0712 | 0.1630 |
| SB8  | 5 | 2.8490 | 0.3846 | 0.6490 | 0.5820 | 1.1890 |
| SB9  | 2 | 1.1509 | 0.1410 | 0.1311 | 0.1225 | 0.2550 |
| SB10 | 3 | 1.5350 | 0.2949 | 0.3485 | 0.3114 | 0.6253 |
| SB11 | 2 | 1.9287 | 0.1667 | 0.4815 | 0.3656 | 0.6745 |
| SB12 | 3 | 1.2430 | 0.2179 | 0.1955 | 0.1753 | 0.3687 |
| SB13 | 4 | 2.1644 | 0.4231 | 0.5380 | 0.4392 | 0.8687 |
| SB14 | 2 | 1.9987 | 0.3077 | 0.4997 | 0.3750 | 0.6928 |
| SB15 | 2 | 1.0662 | 0.0641 | 0.0620 | 0.0601 | 0.1418 |
| SB16 | 4 | 1.4567 | 0.1923 | 0.3135 | 0.2956 | 0.6427 |
| SB17 | 2 | 1.4175 | 0.3590 | 0.2945 | 0.2512 | 0.4706 |
| SB18 | 2 | 1.0392 | 0.0385 | 0.0377 | 0.0370 | 0.0950 |
| SB19 | 3 | 1.0804 | 0.0641 | 0.0744 | 0.0724 | 0.1804 |
| SB20 | 2 | 1.1803 | 0.1667 | 0.1528 | 0.1411 | 0.2868 |
| SB21 | 3 | 1.9123 | 0.7308 | 0.4771 | 0.3802 | 0.7318 |
| SB22 | 3 | 1.2905 | 0.2564 | 0.2251 | 0.2025 | 0.4084 |
| SB23 | 4 | 2.4239 | 0.7949 | 0.5874 | 0.5102 | 1.0284 |

380 Na, observed number of alleles; Ne, effective number of alleles; Ho, observed heterozygosity; He,

381 expected heterozygosity; PIC, polymorphism information content; Is, Shannon's information index.

382

### 383 **Genetic relationships among sea buckthorn germplasm**

384 Using 23 polymorphic SSR markers, the UPGMA dendrogram based on the proportion  
385 of shared alleles was constructed to assess the genetic relationships between the 78  
386 accessions (Fig 4). The results showed that all the accessions could be divided into two  
387 groups (I and II). The accessions of *ssp. sinensis* (JD, ZGSJ, MHC, ZGSJ<sup>wild</sup>, JPDH and  
388 ZXY) were clustered into group I. These accessions had closer relationships, despite  
389 great geographic differences. The second group was divided into 3 subgroups, namely,  
390 IIa, IIb, and IIc. The 20 hybrid accessions were all clustered into IIa. Subgroups IIb and  
391 IIc contained all the accessions of *ssp. mongolica* (introduced from Russia and  
392 Mongolia). Subgroup IIb included 6 accessions, namely WCF, LS1, QYSK, FX, SR,  
393 and MZ14. The remaining accessions of *ssp. mongolica* were clustered into IIc. Among  
394 them, KTN, WLGM, HS4, HS9, HS10, HS12, HS14, HS18, HS20, HS22, WCF, FX  
395 and MZ14 composed one sub-subgroup. SJ3, ZYH, SD, NR, FL, XE2, XE3, JYH and  
396 YLSD12 showed close relationships. The other 23 accessions clustered into the third  
397 sub-subgroup. Overall, the relationship between *ssp. mongolica* and *ssp. sinensis* was  
398 relatively distant. The hybrids are close to *ssp. mongolica*, to which their female parents  
399 belonged.

400

401 **Fig. 4. UPGMA dendrogram of sea buckthorn germplasm based on SSR data (sample**  
402 **abbreviations described in Table 1). ▲ = *ssp. mongolica*; ● = *ssp. sinensis*; ◇ = hybrid.**

403



## 404 **Discussion**

405 Morphological characteristics, biochemical traits, and microsatellite markers have been  
406 used for germplasm identification and genetic diversity analysis in many horticultural  
407 plants [26–27]. The diversity at the morphological, biochemical, and molecular levels  
408 of 78 sea buckthorn accessions, composed of 52 from ssp. *mongolica*, 6 from ssp.  
409 *sinensis*, and 20 hybrids, was investigated.

410 The morphological characterization of plant materials with desired traits is an  
411 essential step for the effective use of germplasm [28]. Here, 8 important agronomic  
412 traits were measured among 78 sea buckthorn accessions, and a considerable amount  
413 of variation in morphological traits was found. The sizes of berries from the two  
414 different subspecies and hybrid accessions were significantly different according to the  
415 HBW value ( $p = 0.000$ ). Compared to ssp. *sinensis* berries, ssp. *mongolica* berries were  
416 much larger on average. The berry size of hybrid accessions was between the two  
417 subspecies. In the PCA, we plotted 2D plots with PC1 and PC2 scores of phenotypes  
418 (Fig 2). PC1 was mainly related to BTD and HBW, which explained the largest portion  
419 of the variance in 78 accessions. The distribution of 78 accessions on PC1 and PC2 was  
420 consistent with their agronomic characteristics (Fig 2). These results estimating  
421 morphological traits are valuable tools for identifying variation among plant  
422 germplasms [26].

423 For biochemical traits, oil content and FA composition in the seeds and seedless  
424 parts were selected for their important roles in human health. The oil of sea buckthorn  
425 seems to be a good source of unsaturated FAs. Seed oil is rich in PUFAs, including

426 linoleic and  $\alpha$ -linolenic acids. The proportion of PUFAs did not differ significantly  
427 among berries from three origins, despite the differences in some morphological  
428 characteristics and in growth conditions. These results were consistent with previous  
429 studies [10]. The results of the present study and previous investigations also suggested  
430 that the berries of *ssp. mongolica* were a good source of palmitic and palmitoleic acids  
431 in pulp oil and that those of *ssp. sinensis* were a good source of oleic acid in both seeds  
432 and fruit pulp [29]. Although carefully selected for intersubspecies crosses, some  
433 hybrids displayed elite oil traits. For example, the proportion of MUFAs in the pulp of  
434 SCY2 and of PUFAs in the seeds of 6 accessions (including ZJ1, Za1-2, Za13-25, Za05-  
435 6, LFZ, and ZCY12) exceeded the average level of *ssp. mongolica* accessions, the  
436 subspecies that one of their parents belonged to. These results demonstrate the  
437 effectiveness of traditional cross breeding in the improvement of native accessions (*ssp.*  
438 *sinensis*), even though it is time-consuming and has low efficiency.

439 Previous studies found that berry size is a useful indicator of Vc, sugars and acids  
440 in population identification [19, 30]. The nutrients in the seedless fraction were more  
441 concentrated in the small berries of *ssp. sinensis* than in the large berries of *ssp.*  
442 *mongolica* [29]. In the present study, we analyzed the correlation between agronomic  
443 characteristics and oil traits at different levels (seed and pulp) by CCA. The results  
444 showed that the phenotypic characteristics (BLD, HBW, BSI, and BTD) of berries and  
445 the oil traits in pulp were positively correlated ( $r = 0.8725$ ,  $p = 0.0000$ ). The BLD, as a  
446 promising marker, provided the primary difference in CCA. Our results illustrated that  
447 berry size had different correlations with various biochemical characteristics in sea

448 buckthorn.

449 Variation in phenotypic traits among germplasms may be attributed to differences  
450 in genetic backgrounds, geographical location, climate, harvest period and berry  
451 maturity, while molecular markers are independent of environmental condition and  
452 growth stage [31]. Twenty-three polymorphic SSR markers were used to identify 78 sea  
453 buckthorn accessions. The 23 selected SSR markers detected 2–5 alleles, and their PIC  
454 values ranged from 0.1166 to 0.6155 and had an average of 0.3249. The PIC mean value  
455 was significantly lower than that of RAPD, ISSR and SRAP markers previously  
456 reported [15–16, 32], suggesting that the gene sequences of these SSR markers were  
457 conserved in sea buckthorn germplasm.

458 Based on UPGMA, the 78 accessions were classified into two groups. There is a  
459 large genetic distance between accessions of *ssp. sinensis* and *ssp. mongolica*. The  
460 hybrids were in between and rather close to *ssp. mongolica* accessions. Coincidentally,  
461 these hybrids were also ~~between *ssp. sinensis* and *ssp. mongolica* accessions on the~~  
462 PCA plot based on 8 agronomic characteristics. ~~This result illustrated~~ that the diversity  
463 of morphological characteristics could reflect genetic diversity and be used as markers  
464 in agronomy. Ruan et al. [15] assessed 14 Chinese, Russian and Mongolian sea  
465 buckthorn accessions using RAPD markers and obtained similar results. In a previous  
466 publication, the genetic relationship of 31 sea buckthorn accessions (also contained in  
467 this study) was analyzed based on 17 RNA-Seq SSRs [14]. However, the accessions of  
468 *ssp. mongolica* clustered in one group and those of *ssp. sinensis* and hybrids were  
469 divided in the other. This revealed that genetic relationships mainly relied on the

470 diversity of genotypes and genetic backgrounds.

471 With the continuous development of high-throughput sequencing technology,  
472 transcriptome databases have become a powerful resource for SSR mining. An  
473 increasing number of RNA-Seq SSRs have been developed and applied to the study of  
474 species genetic diversity and population genetic structure [33–34]. The SSRs obtained  
475 by transcriptomes are associated with many important quantitative traits [35].

476 The results in the present study yielded useful knowledge regarding the diversity  
477 and genetic relationships of sea buckthorn germplasm in northern China, and could  
478 therefore facilitate further studies, including the selection of mapping populations and  
479 promising candidates, marker-trait association analysis based on establishing the  
480 consistency of the traits , and characterization of parents used in future breeding  
481 programs.

482

## 483 **Conclusion**

484 In the present study, 8 phenotypic characteristics, oil traits in seeds and seedless parts,  
485 and 23 SSR markers successfully distinguished all 78 sea buckthorn accessions. In PCA,  
486 BTD and HBW in the first PC were the most important characteristics for distinguishing  
487 the accessions. The agronomic traits of berries were closely correlated with the oil  
488 content and FA composition in the pulp by CCA. This information will be valuable for  
489 germplasm identification and genotypic diversity analysis in *Hippophae rhamnoides*.

490

## 491 **Supporting information**

492 **S1 Fig. 78 berry samples used in this study.** Numbers are the variety codes listed in  
493 [Table 1.](#)

494 (TIF)

495 **S2 Fig. Total ion flow chromatography of 37 FAMEs Mix (A) and FAMEs in pulp  
496 oil in MHC (B).**

497 (TIF)

498 **S1 Table. Samples of sea buckthorn grouped according to different genetic  
499 backgrounds.**

500 (DOCX)

501 **S2 Table. Characterization of the hybrids of sea buckthorn accessions studied.**

502 (DOCX)

503 **S3 Table. Climatic conditions at different growth sites of sea buckthorn samples  
504 in China.**

505 (DOCX)

506 **S4 Table. Primer sequences, annealing temperature, and estimated allelic size of  
507 23 SSR markers.**

508 (DOCX)

509 **S5 Table. Descriptive statistics for morphological traits of berries and seeds among  
510 the sea buckthorn accessions studied.**

511 (DOCX)

512 **S6 Table. The morphological characteristics and oil traits of pulp and seeds of the  
513 78 sea buckthorn accessions studied.**

514 (XLSX)

515 **S7 Table. Fruit traits and Vc contents of large berry accessions of sea buckthorn**  
516 **in two experimental fields (located in Suiling and Dengkou).**

517 (DOCX)

518 **S8 Table. Allele combinations obtained at the 20 microsatellite loci in 78 sea**  
519 **buckthorn accessions.**

520 (TXT)

521

## 522 **Acknowledgements**

523 The authors are grateful to Hai Guo (Jiuchenggong Breeding Base of Sea Buckthorn)  
524 and Jun Zhang (Institute of Selection and Breeding of *Hippophae*) for the collection of  
525 plant materials.

526

## 527 **References**

- 528 1. Bartish IV, Jeppsson N, Nybom H, Swenson U. Phylogeny of *Hippophae* (Elaeagnaceae) inferred  
529 from parsimony analysis of chloroplast DNA and morphology. *Syst Bot.* 2002; 27:41–54.
- 530 2. Swenson U and Bartish IV. Taxonomic synopsis of *Hippophae* (Elaeagnaceae). *Nord J Bot.* 2002;  
531 22:369–374.
- 532 3. Teleszko M, Wojdyło A, Rudzińska M, Oszmiański J, Golis T. Analysis of Lipophilic and  
533 Hydrophilic Bioactive Compounds Content in Sea Buckthorn (*Hippophaë rhamnoides* L.) Berries.  
534 *J Agric Food Chem.* 2015; 63:4120–4129.
- 535 4. Pop MR, Weesepeel Y, Socaciu C, Pintea A, Vincken JP, Gruppen H. Carotenoid composition of

- 536 berries and leaves from six Romanian sea buckthorn (*Hippophae rhamnoides* L.) varieties. Food  
537 Chem. 2014; 147:1–9.
- 538 5. Raffo A, Paoletti F, Antonelli M. Changes in sugar, organic acid, flavonol and carotenoid  
539 composition during ripening of berries of three seabuckthorn (*Hippophae rhamnoides* L.) cultivars.  
540 Eur Food Res Technol. 2004; 219:360–368.
- 541 6. Bal ML, Meda V, Naik NS, Satya S. Sea buckthorn: A potential source of valuable nutrients for  
542 nutraceuticals and cosmoceuticals. Food Res Int. 2011; 44:1718–1727.
- 543 7. Suryakumar G, Gupta A. Medicinal and therapeutic potential of Sea buckthorn (*Hippophae*  
544 *rhamnoides* L.). J Ethnopharmacol. 2011; 138:268–278.
- 545 8. Grey C, Widén C, Adlercreutz P, Rumpunen K, Duan RD. Antiproliferative effects of sea buckthorn  
546 (*Hippophae rhamnoides* L.) extracts on human colon and liver cancer cell lines. Food Chem.2010;  
547 120: 1004–1010.
- 548 9. Xu YJ, Kaur M, Dhillon SR, Tappia SP, Dhalla SN. Health benefits of sea buckthorn for the  
549 prevention of cardiovascular diseases. J Func Foods. 2011; 3:2–12.
- 550 10. Yang B and Kallio H. Composition and Physiological Effects of Sea Buckthorn Lipids, Trends Food  
551 Sci Technol. 2002; 13:160–167.
- 552 11. Yang B and Kallio H. Fatty acid composition of lipids in sea buckthorn (*Hippophaë rhamnoides* L.)  
553 berries of different origins. J. Agric. Food Chem. 2001; 49:1939–1947.
- 554 12. Ruan CJ, Li H, Mopper S. Characterization and identification of ISSR markers associated with  
555 resistance to dried-shrink disease in sea buckthorn. Mol. Breeding. 2009; 24:255–268.
- 556 13. Ruan CJ, Teixeira da Silva JA, Jin H, Li H, Li DQ. Research and biotechnology in sea buckthorn  
557 (*Hippophae* spp.). Medicinal and Aromatic Plant Science and Biotechnology. 2007; 1: 47–60.

- 558 14. Li H, Ruan CJ, Wang L, Ding J, Tian XJ. Development of RNA-Seq SSR markers and application  
559 to genetic relationship analysis among sea buckthorn germplasm. *J Amer Soc Hort Sci.* 2017;  
560 142(3):200-208.
- 561 15. Ruan CJ. Genetic relationships among some sea buckthorn cultivars from China, Russia and  
562 Mongolia using RAPD markers. *Sci Hort.* 2004; 101:417–426.
- 563 16. Li H, Ruan CJ, Teixeira da Silva J, Liu BQ. Associations of SRAP markers with dried-shrink disease  
564 resistance in a germplasm collection of sea buckthorn (*Hippophae L.*). *Genome.* 2010; 53:447–457.
- 565 17. Kalia RK, Rai MK, Kalia S, Singh R, Dhawan AK. Microsatellite markers: An overview of the  
566 recent progress in plants. *Euphytica.* 2011; 177:309–334.
- 567 18. Jain A, Chaudhary S, Sharma PC. Mining of microsatellites using next generation sequencing of  
568 seabuckthorn (*Hippophae rhamnoides L.*) transcriptome. *Physiol. Mol. Biol. Plants.* 2014; 20:115–  
569 123.
- 570 19. Patricia RR, Carmen GB, Beatriz CG, Jesús SG, Isabel T. Genotypic and phenotypic  
571 identification of olive cultivars from northwestern Spain and characterization of their extra  
572 virgin olive oils in terms of fatty acid composition and minor compounds. *Sci Hort.* 2018;  
573 232:269-279.
- 574 20. Tang X and Tigerstedt PMA. Variation of physical and chemical characters within an elite sea  
575 buckthorn (*Hippophae rhamnoides L.*) breeding population. *Sci. Hort.* 2001; 88(3):203–214.
- 576 21. Christie WW. A simple procedure for rapid transmethylation of glycerolipids and cholesteryl esters.  
577 *J Lipid Res.* 1982; 23:1072-1075.
- 578 22. Peakall R and Smouse PE. GENALEX 6: Genetic analysis in Excel. Population genetic software  
579 for teaching and research. *Mol Ecol Notes.* 2006; 6:288–295.



- 580 23. Peakall R and Smouse PE. GenAEx 6.5: Genetic analysis in Excel. Population genetic software for  
581 teaching and research – An update. *Bioinformatics*. 2012; 28:2537–2539.
- 582 24. Liu K and Muse SV. PowerMarker: An integrated analysis environment for genetic marker analysis.  
583 *Bioinformatics*. 2005; 21:2128–2129.
- 584 25. Tamura SK, Peterson GD, Filipski A, Kumar S. MEGA6: Molecular evolutionary genetics analysis  
585 version 6.0. *Mol Biol Evol*. 2013; 30:2725–2729.
- 586 26. Lee ON and Park HY. Assessment of genetic diversity in cultivated radishes (*Raphanus sativus*) by  
587 agronomic traits and SSR markers. *Sci Hort*. 2017; 223:19-30.
- 588 27. Goodarzi S, Khadivi A, Abbasifar A, Akramian M. Phenotypic, pomological and chemical  
589 variations of the seedless barberry (*Berberis vulgaris* L. var. *asperma*). *Sci Hort*. 2018; 238:38–50.
- 590 28. Santos RC, Pires JL, Correa RX. Morphological characterization of leaf, flower, fruit and seed traits  
591 among Brazilian *Theobroma* L. species. *Genet. Resour. Crop Evol*. 2012; 59:327–345.
- 592 29. Kallio H, Yang B, Peippo P, Tahvonen R, Pan R. Triacylglycerols, glycerophospholipids,  
593 tocopherols and tocotrienols in sea buckthorn *Hippophae rhamnoides* L. ssp. *sinensis* and ssp.  
594 *mongolica* berries and seeds. *J. Agric. Food Chem*. 2002; 50:3004–3009.
- 595 30. Kallio H, Yang B, Peippo P. Effects of Different Origins and Harvesting Time on Vitamin C,  
596 Tocopherols, and Tocotrienols in Sea Buckthorn (*Hippophae1 rhamnoides*) Berries. *J. Agric. Food*  
597 *Chem*. 2002; 50:6136–6142.
- 598 31. Ali M, Rajewski J, Baenziger P, Gill K, Eskridge KM, Dweikat I. Assessment of genetic diversity  
599 and relationship among a collection of US sweet sorghum germplasm by SSR markers. *Mol. Breed*.  
600 2008; 21:497–509.
- 601 32. Li, H., C.J. Ruan, and J.A. Teixeira da Silva. 2009. Identification and genetic relationship based on

- 602        ISSR analysis in a germplasm collection of sea buckthorn (*Hippophae* L.) from China and other  
603        countries. *Sci. Hort.* 123:263–271.
- 604    33. Liu YL, Zhang PF, Song ML, Hou JL, Qing M, Wang WQ, Liu CS. Transcriptome analysis and  
605        development of SSR molecular markers in *Glycyrrhiza uralensis* Fisch. *PLoS One.* 2015;  
606        10:e0143017. doi:10.1371/journal.pone.0143017
- 607    34. Zhang LW, Li YR, Tao AF, Fang PP, Qi JM. Development and characterization of 1,906 EST-SSR  
608        markers from unigenes in jute (*Corchorus* spp.), *PLoS One.* 2015; 10(10):e0140861.  
609        doi:10.1371/journal.pone.0140861
- 610    35. Ramchiary N, Nguyen VD, Li X, Hong CP, Dhandapani V, Choi SR, et al. Genic microsatellite  
611        markers in *Brassica rapa*: Development, characterization, mapping, and their utility in other  
612        cultivated and wild *Brassica* relatives. *DNA Res.* 2011; 18:305–320.

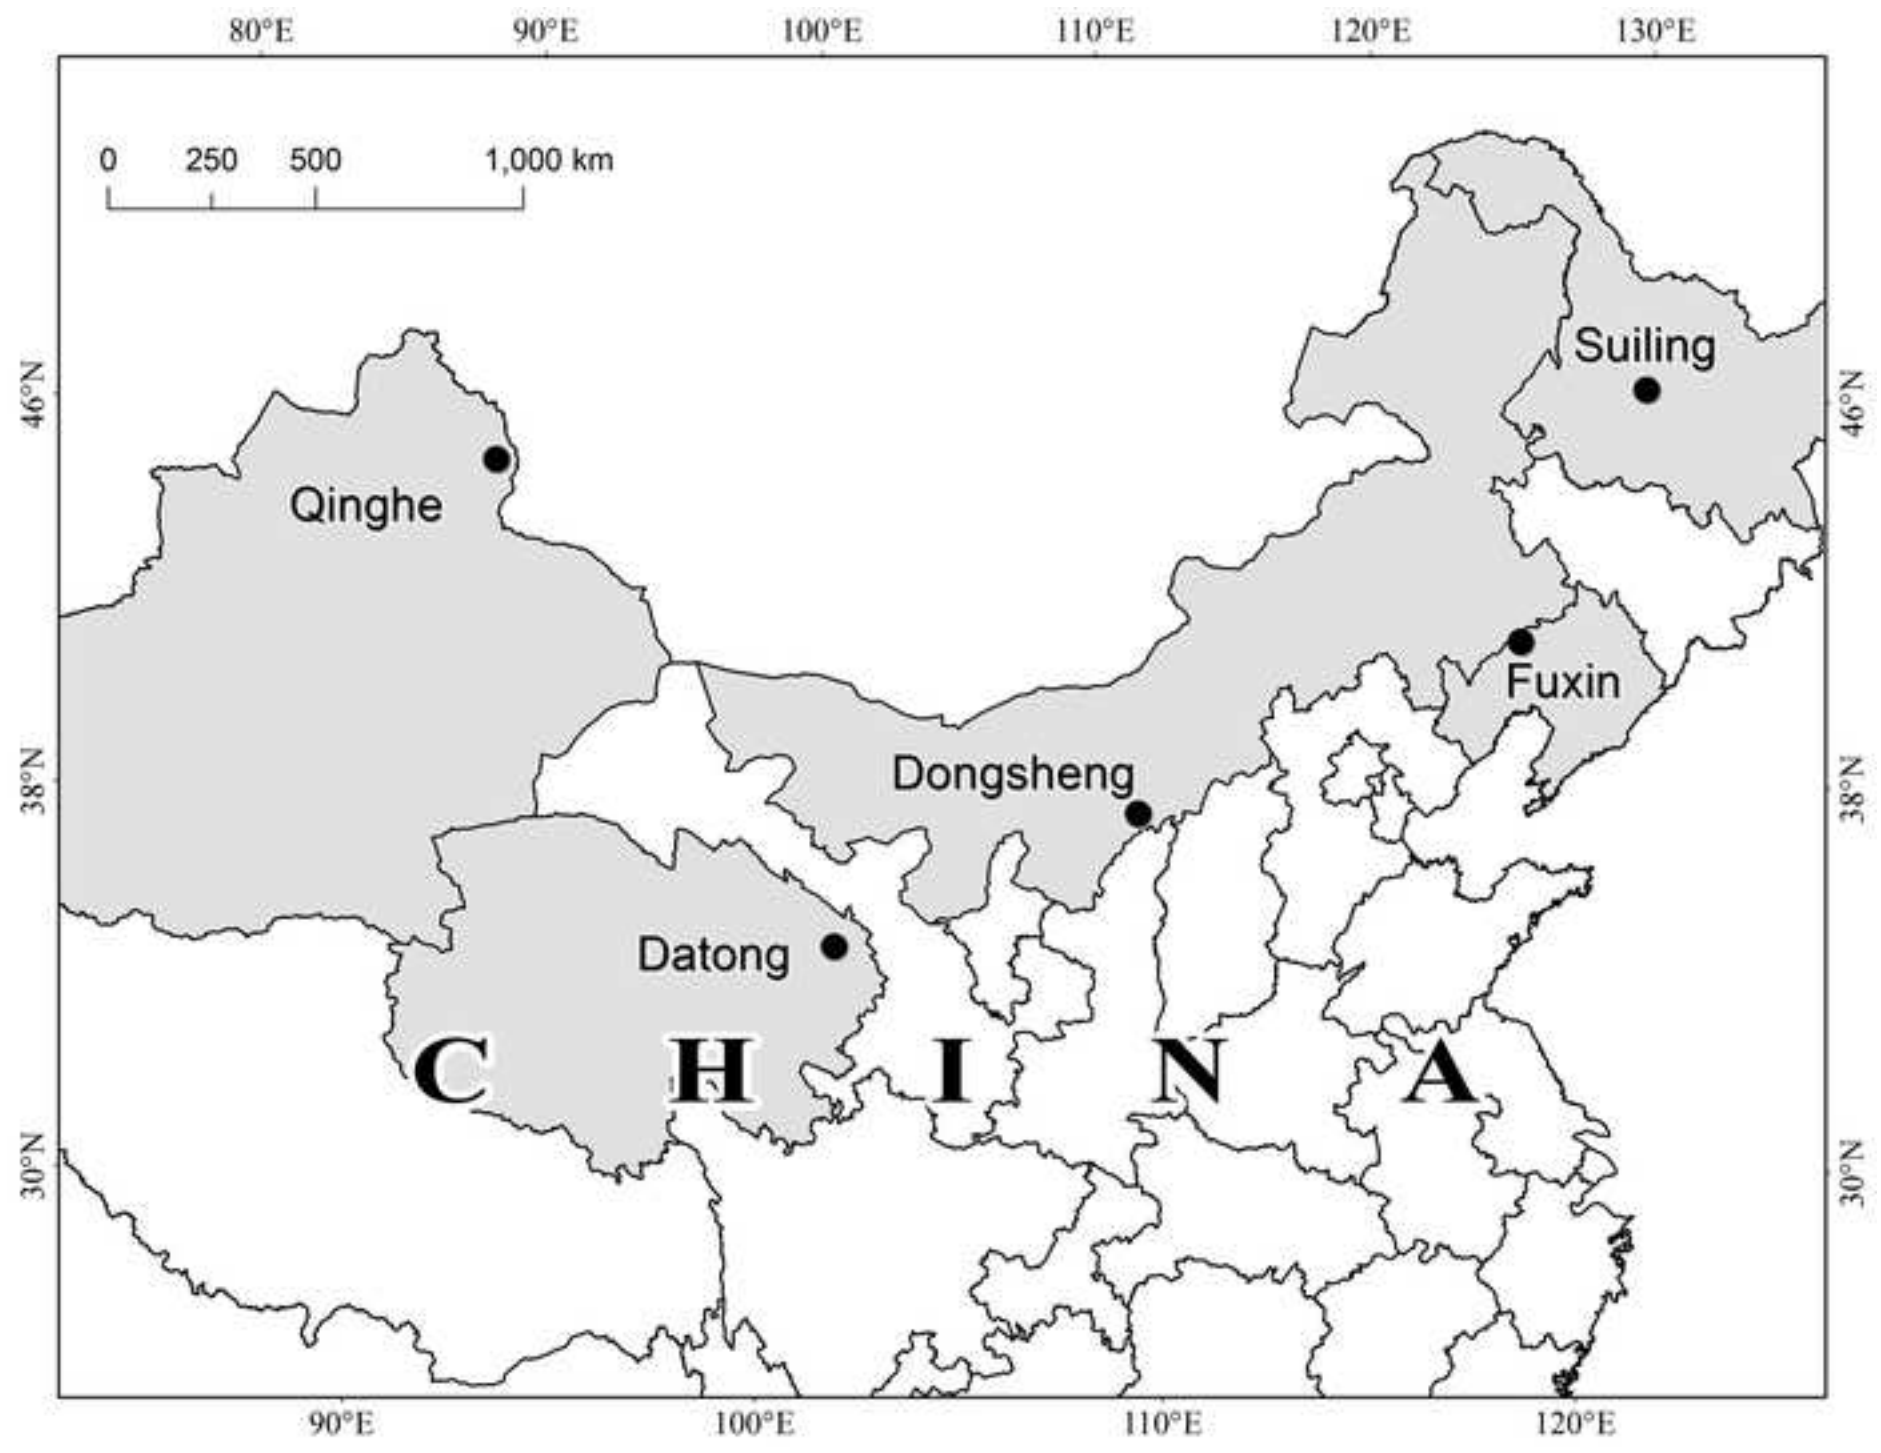

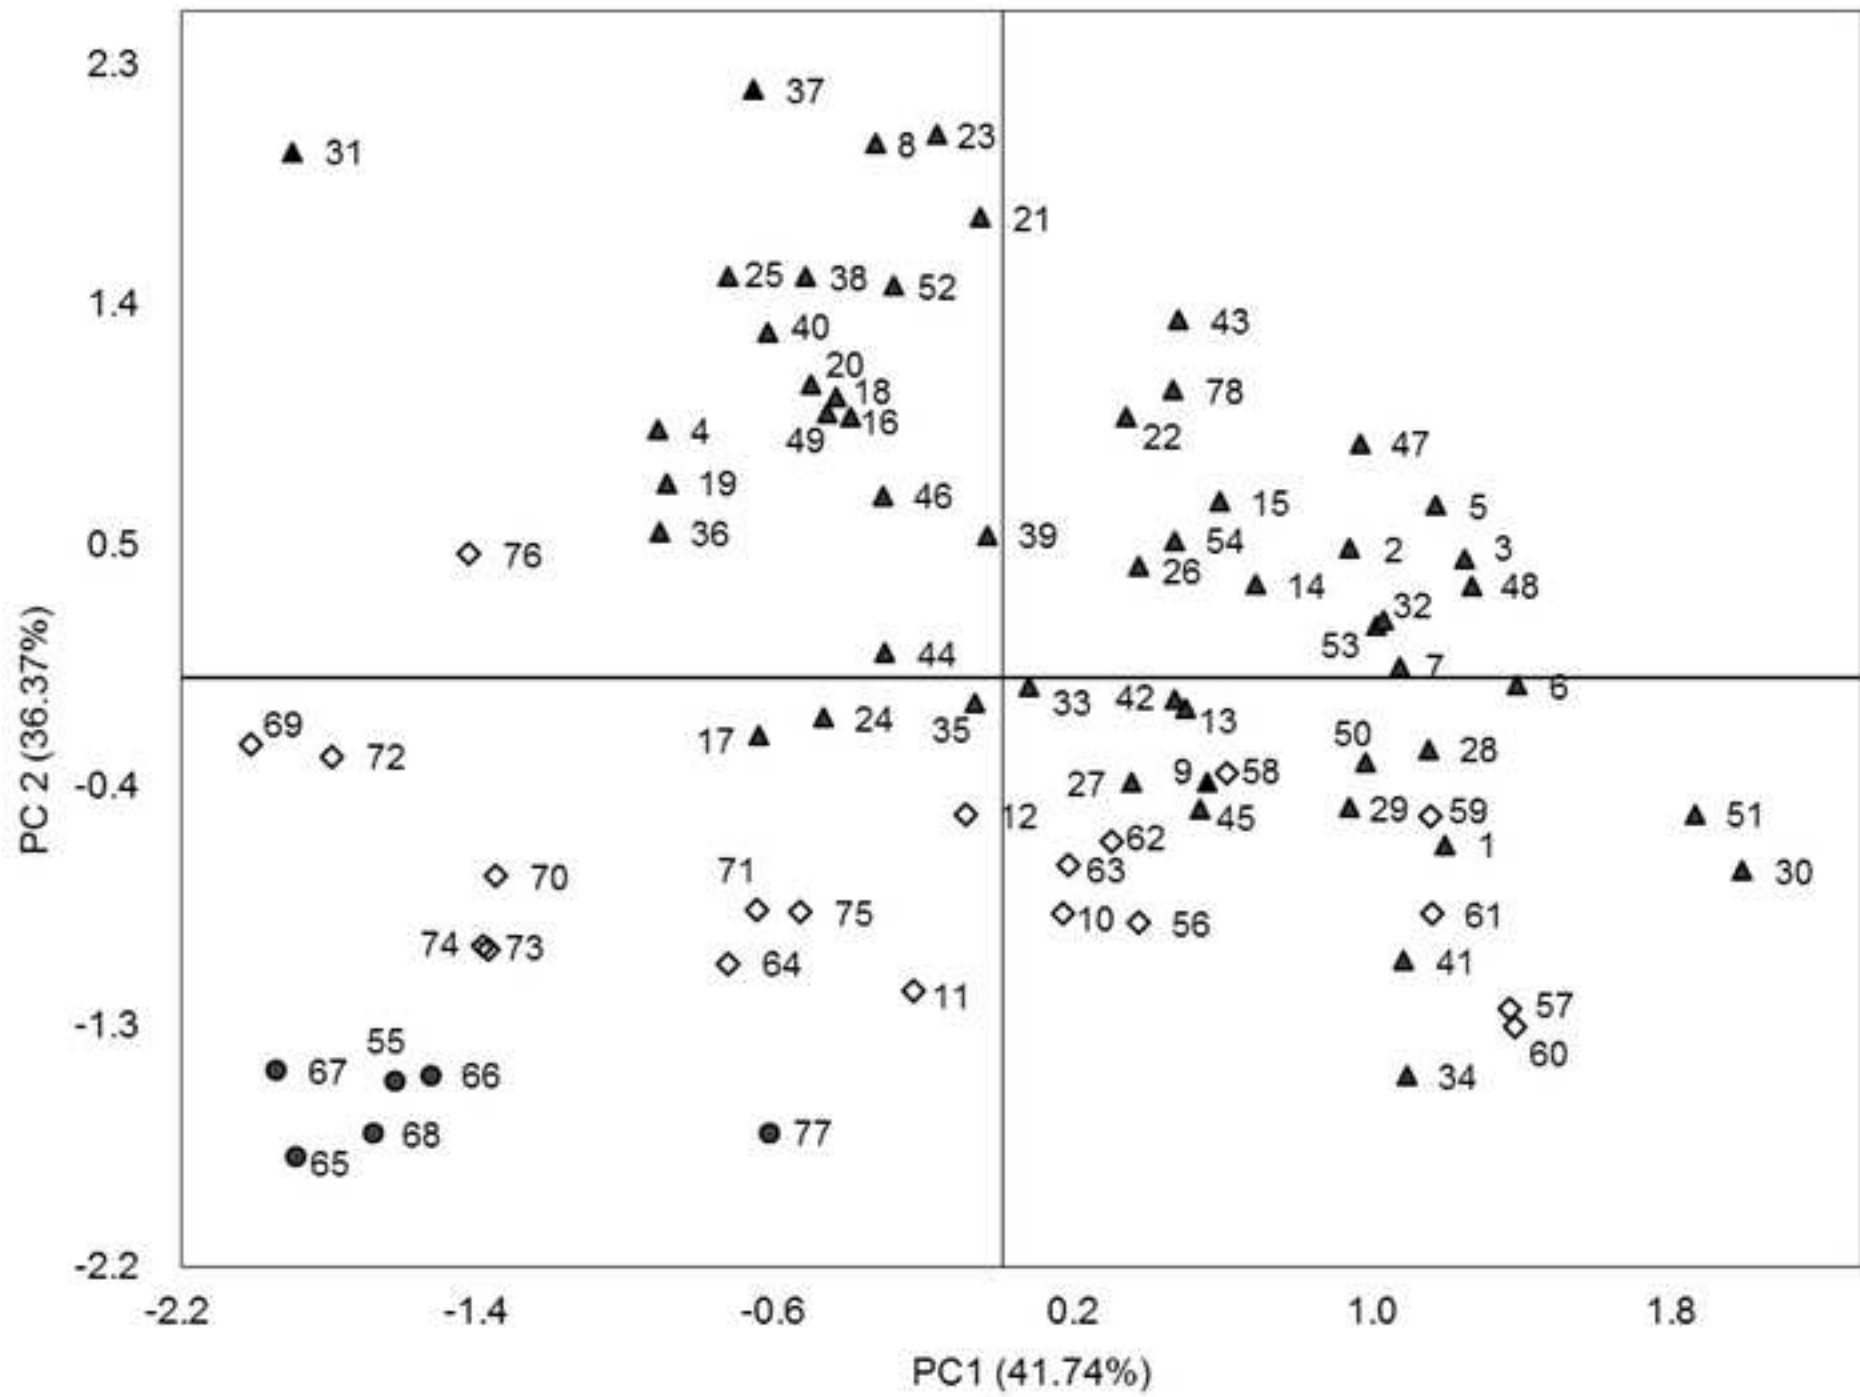

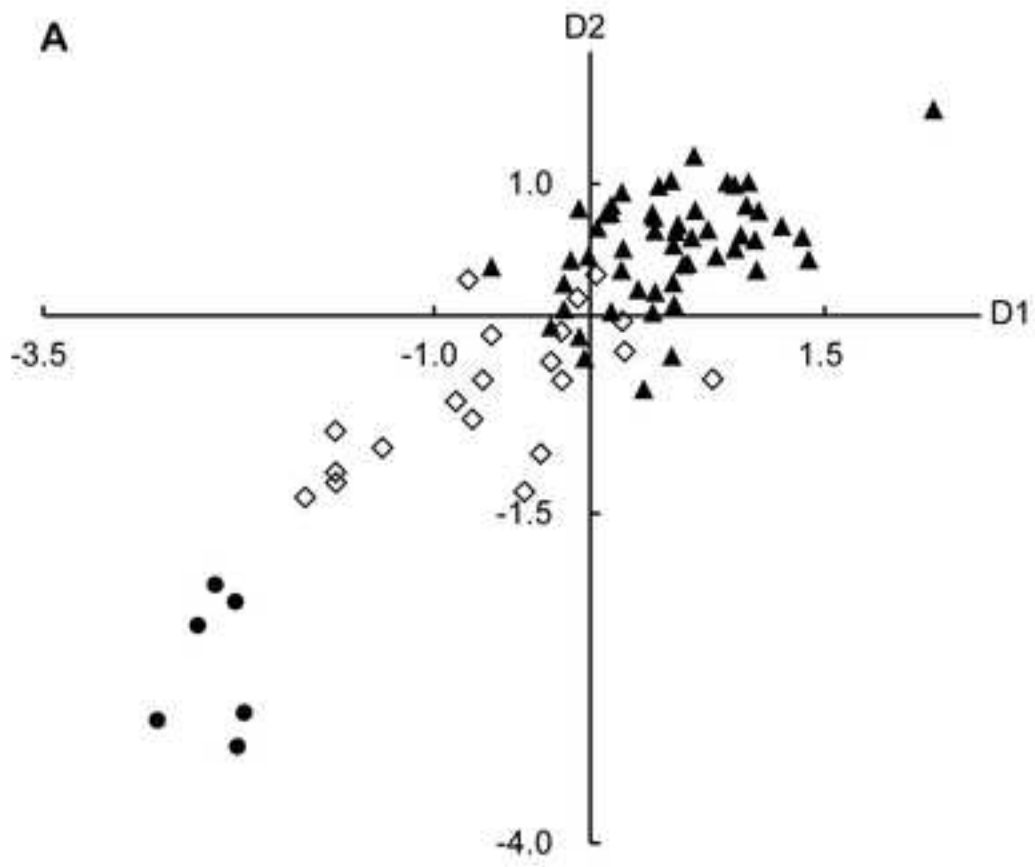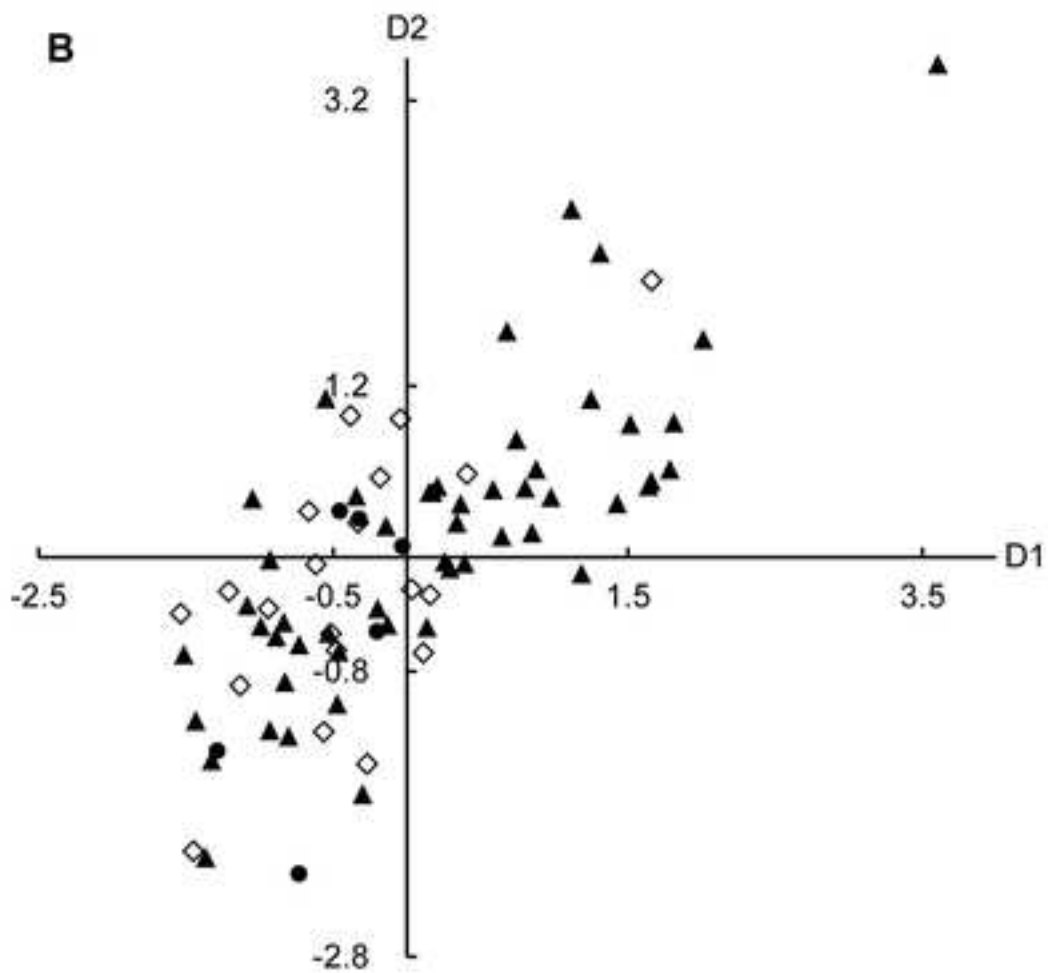

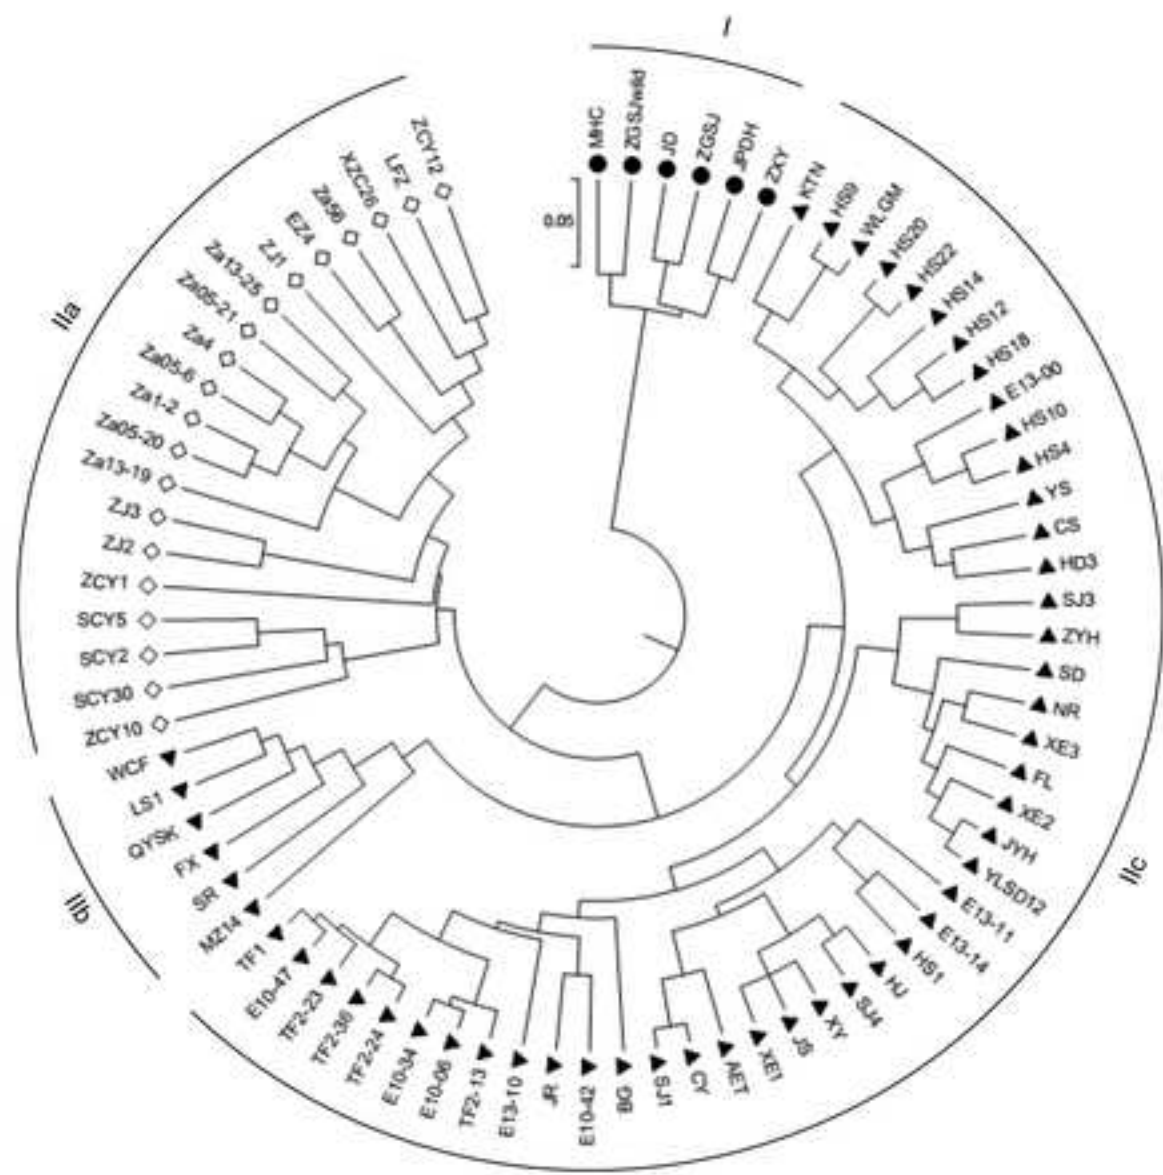

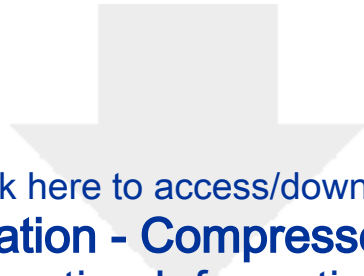

[Click here to access/download](#)

**Supporting Information - Compressed/ZIP File Archive**  
Supporting Information.zip

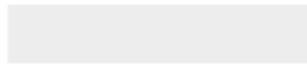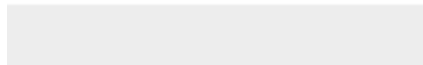

Supplement: pone.0230356.s016.pdf [file pone.0230356.s016.pdf]
